# Supplementary material for: Design, synthesis, and antibacterial evaluation of a novel series of biaryloxazolidinone derivatives against Gram-positive bacteria
Source: Royal Society of Chemistry journal article supplement (doi:10.1039/d2nj00479h), 2022-01-01
Supplement: d2nj00479h1.pdf [file d2nj00479h1.pdf]

*Supporting Information*

**Design, synthesis and antibacterial evaluation of a novel series of biaryloxazolidinone derivatives against antibiotic-susceptible and antibiotic-resistant Gram-positive bacteria**

Yinliang Qi <sup>a</sup>, Xiudong Ding <sup>b</sup>, Kun Wang <sup>a</sup>, Pinzhen Yan <sup>a</sup>, Xinxin Guo <sup>a</sup>, Shiwei Ma <sup>a</sup>, Mingfei Xiao <sup>a</sup>, Pengrui Sun <sup>b</sup>, Siyu Liu <sup>a</sup>, Yunlei Hou <sup>a,\*</sup>, Yanfang Zhao <sup>a,\*</sup>

<sup>a</sup> School of Pharmaceutical Engineering, Shenyang Pharmaceutical University, 103 Wenhua Road, Shenhe District, Shenyang, Liaoning, 110016, China.

<sup>b</sup> Department of Clinical Laboratory, The Eighth Medical Center of PLA General Hospital, Beijing 100091, China

**1. <sup>1</sup>H-NMR Spectra**

**Compound 9**

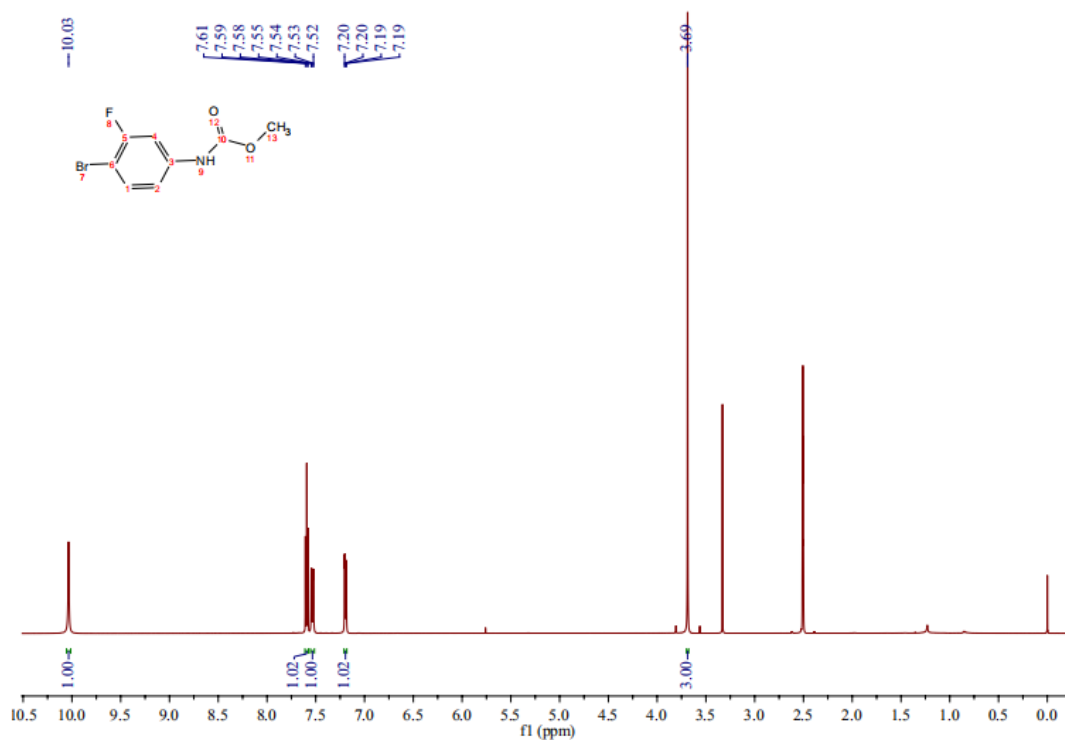

**Compound 10**

\* Corresponding author

\*\* Corresponding author

E-mail addresses: houyunlei901202@163.com (Y. Hou), yanfangzhao@126.com (Y. Zhao).

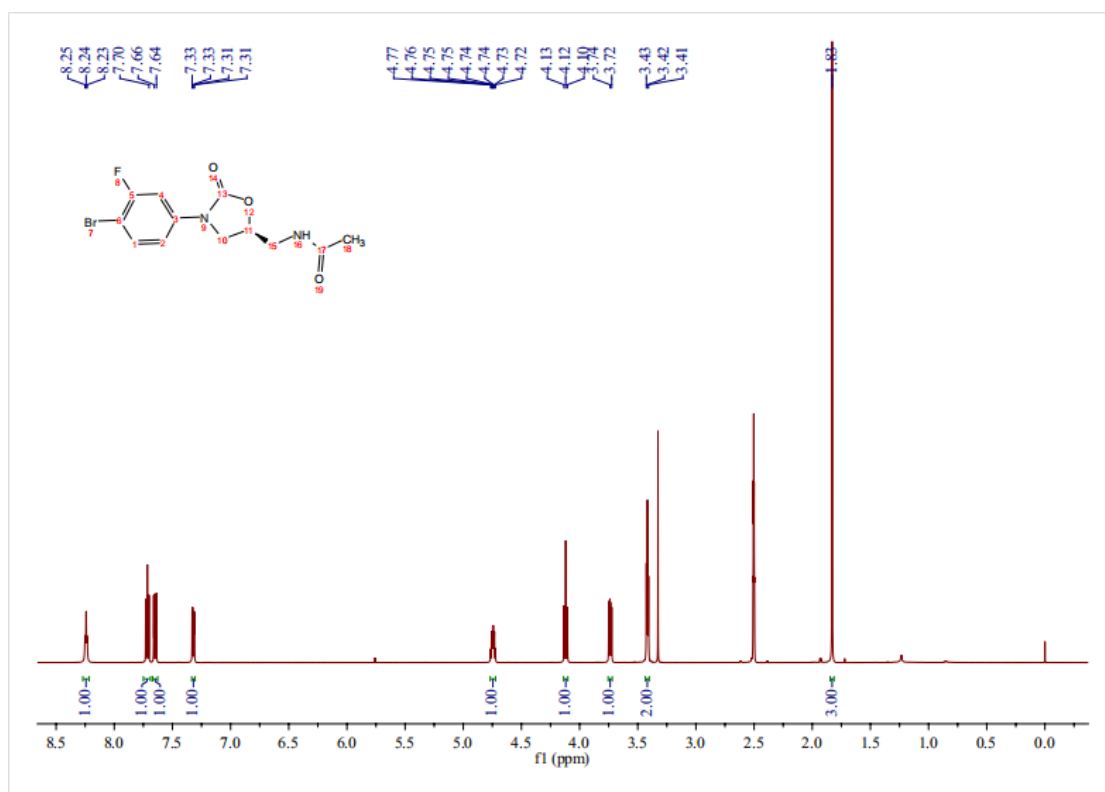

**Compound 13a-1**

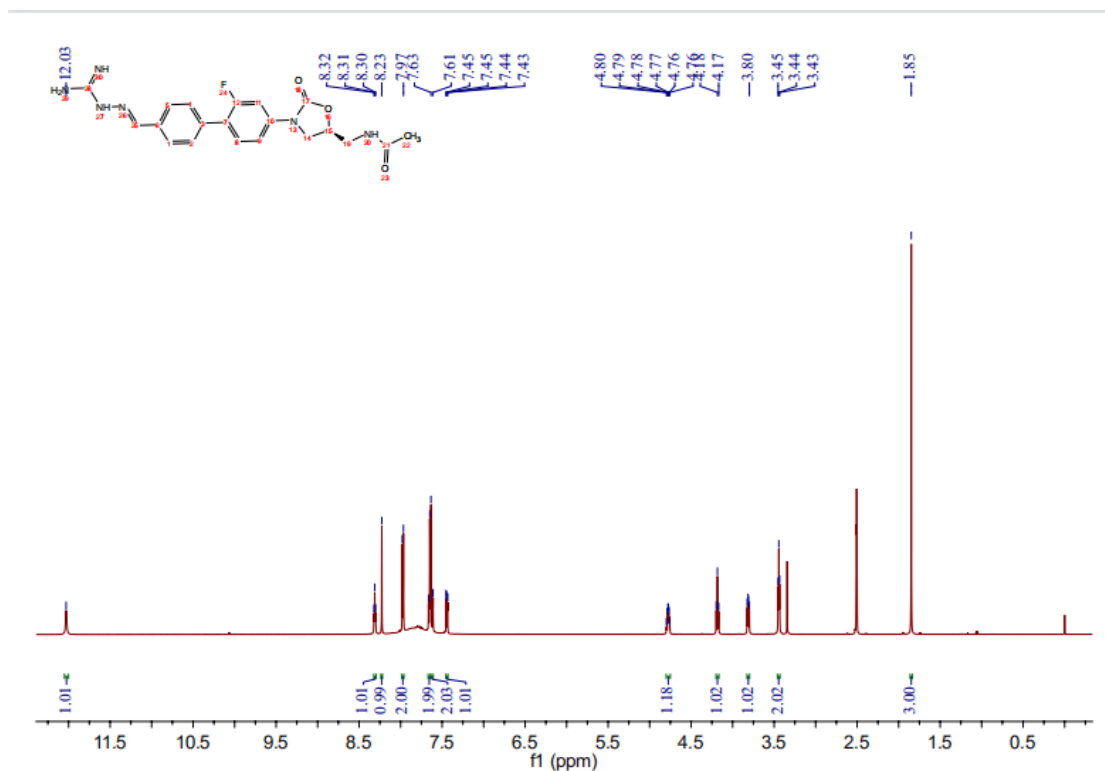

**Compound 13a-2**

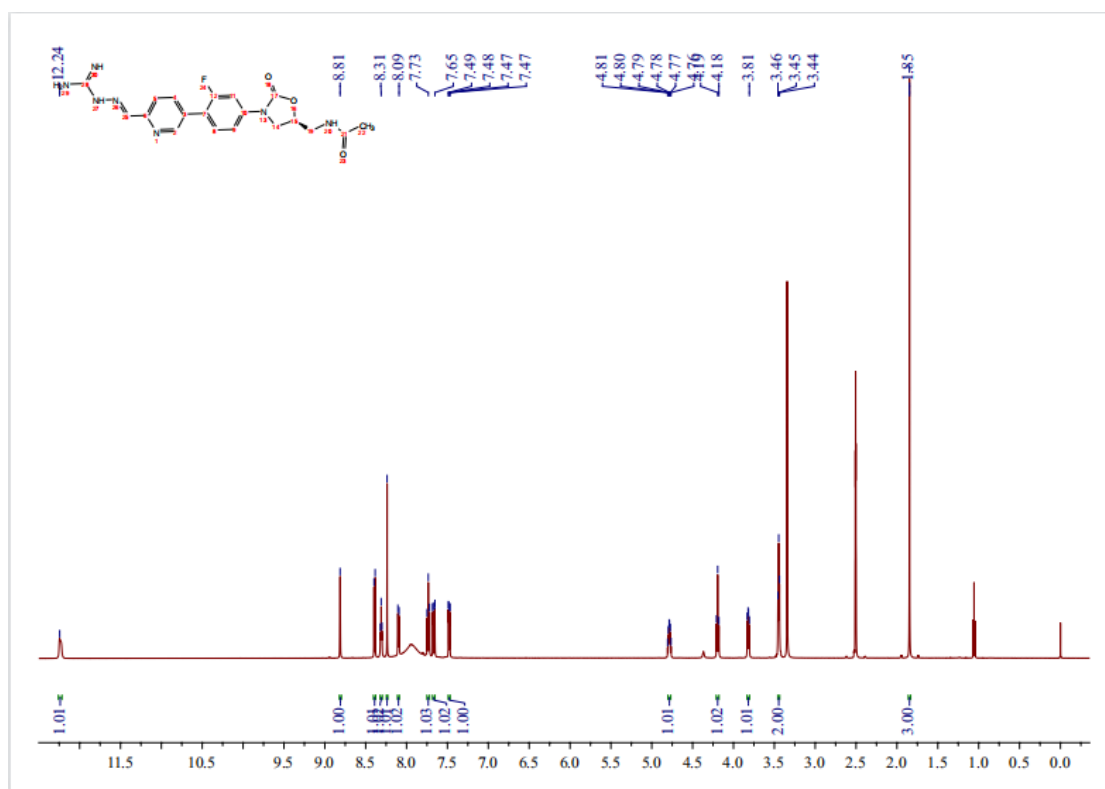

**Compound 13a-3**

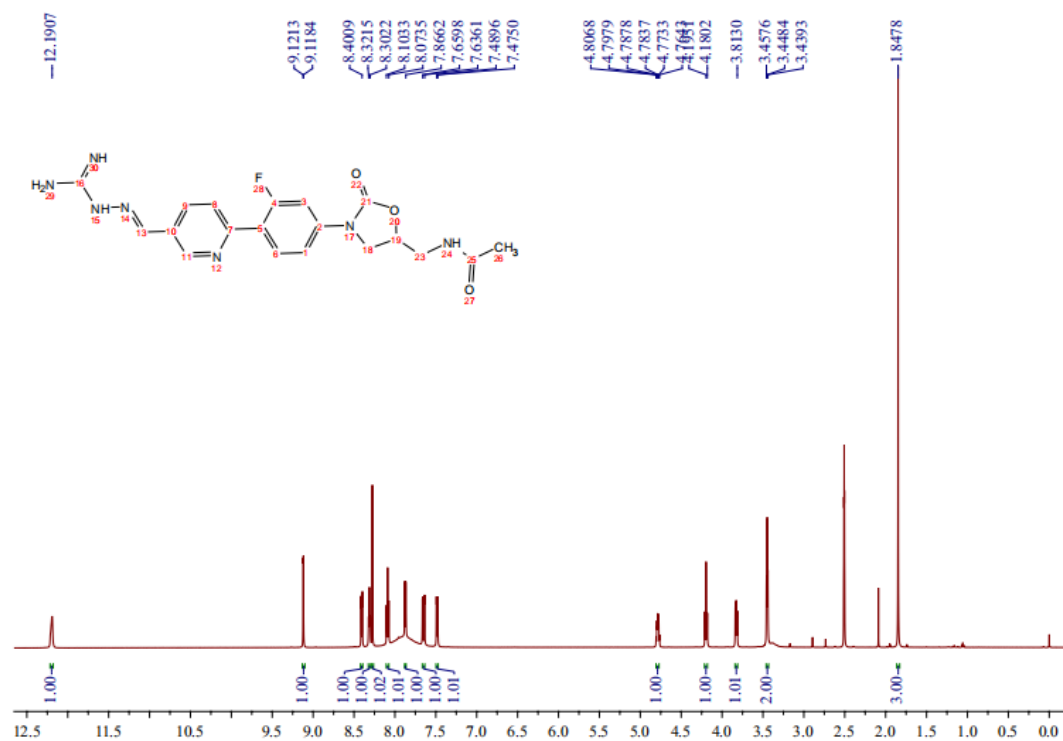

**Compound 13a-4**

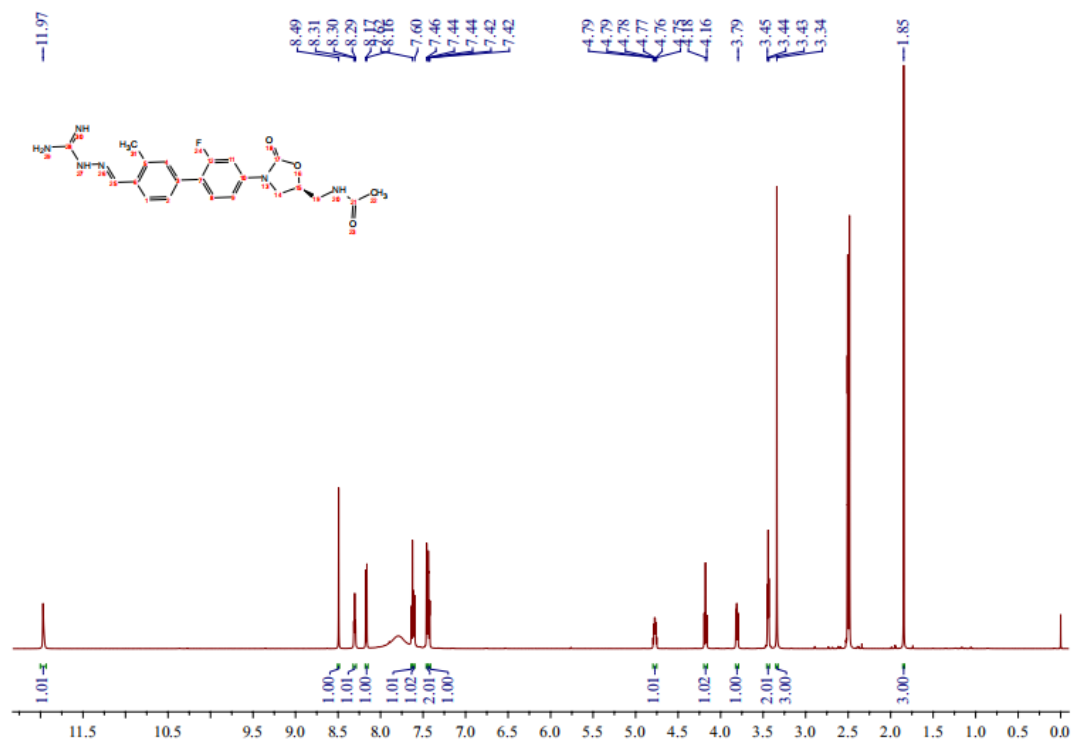

**Compound 13a-5**

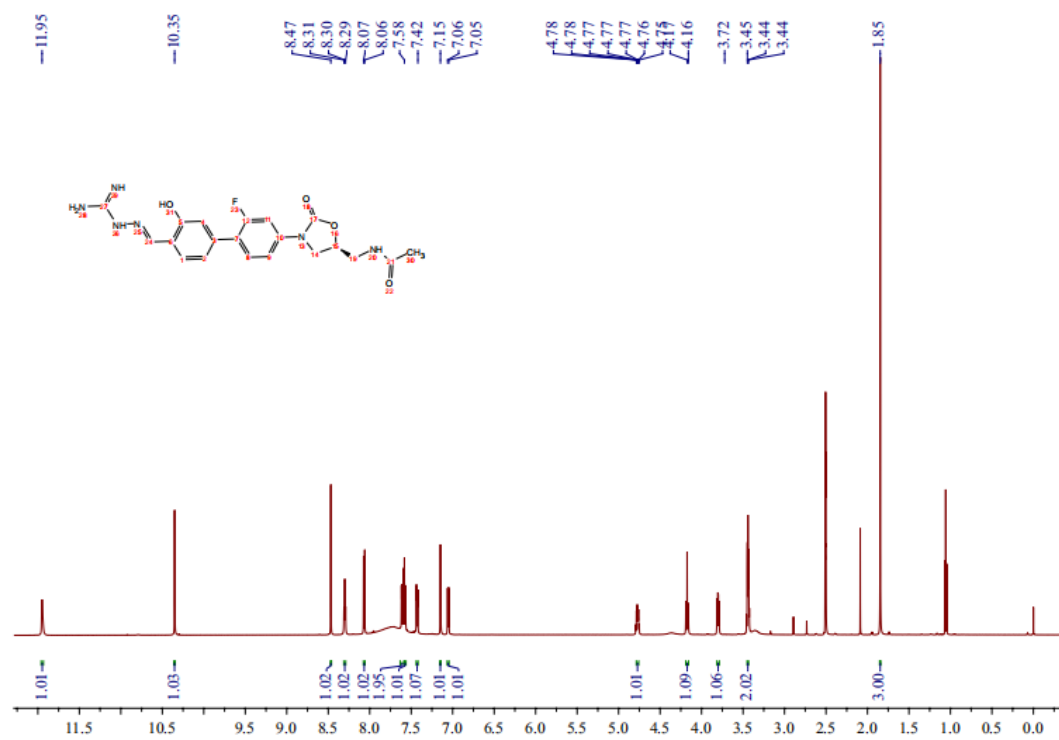

**Compound 13a-6**



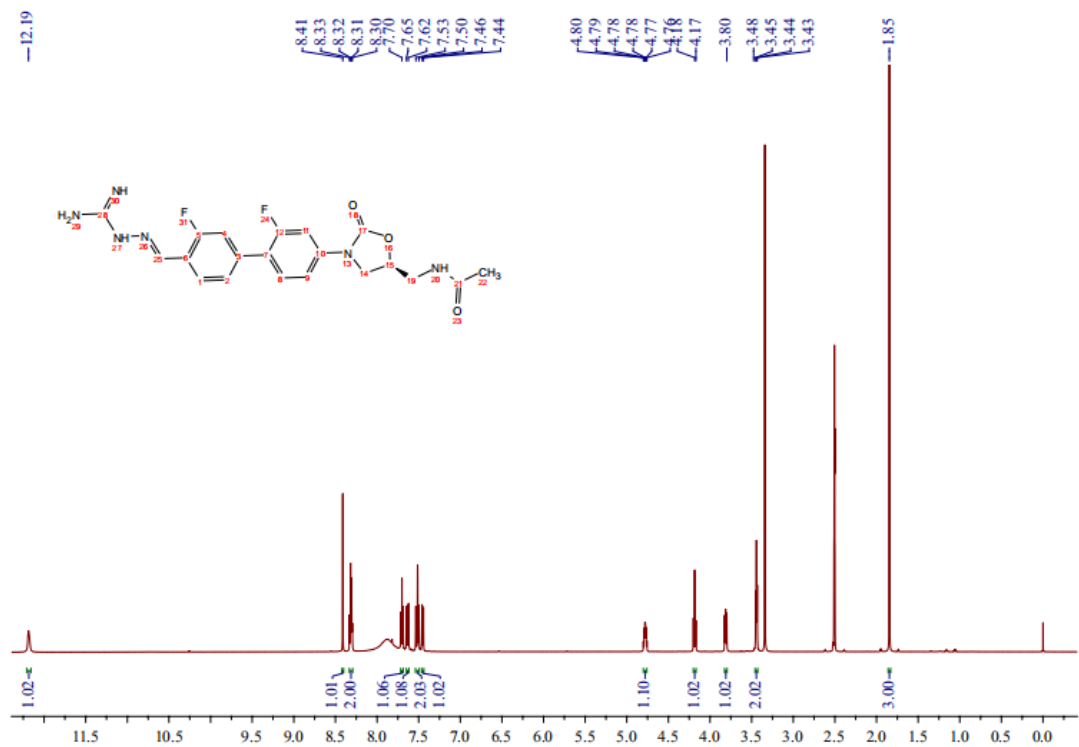

**Compound 13b-1**

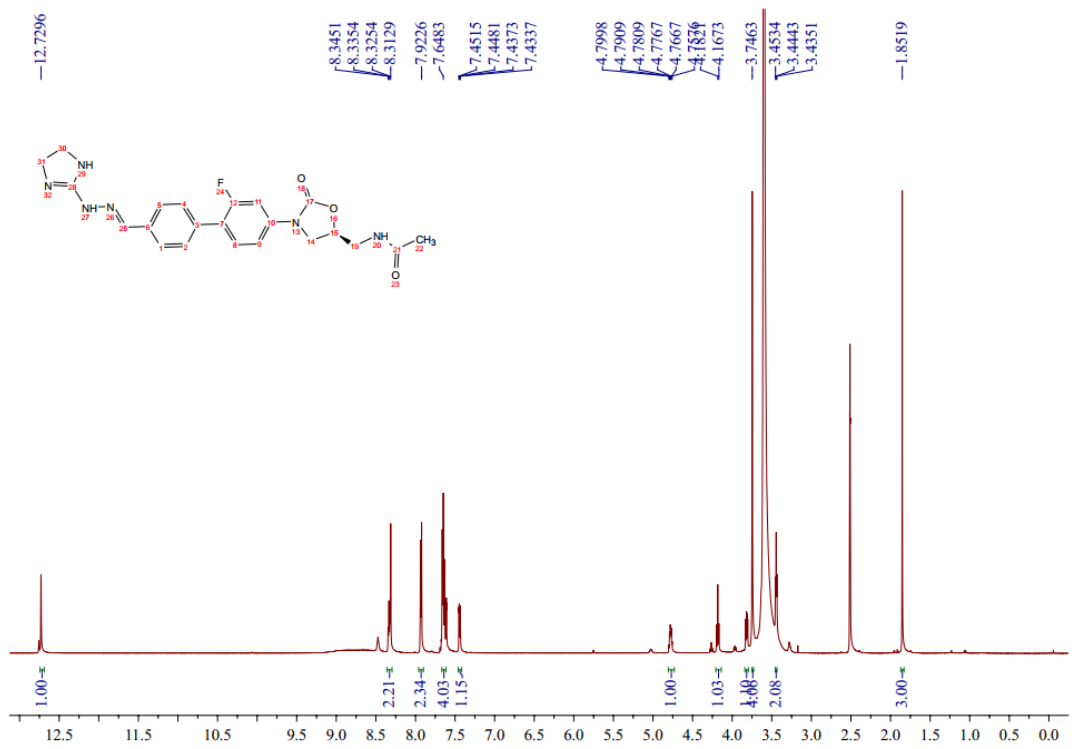

**Compound 13b-2**

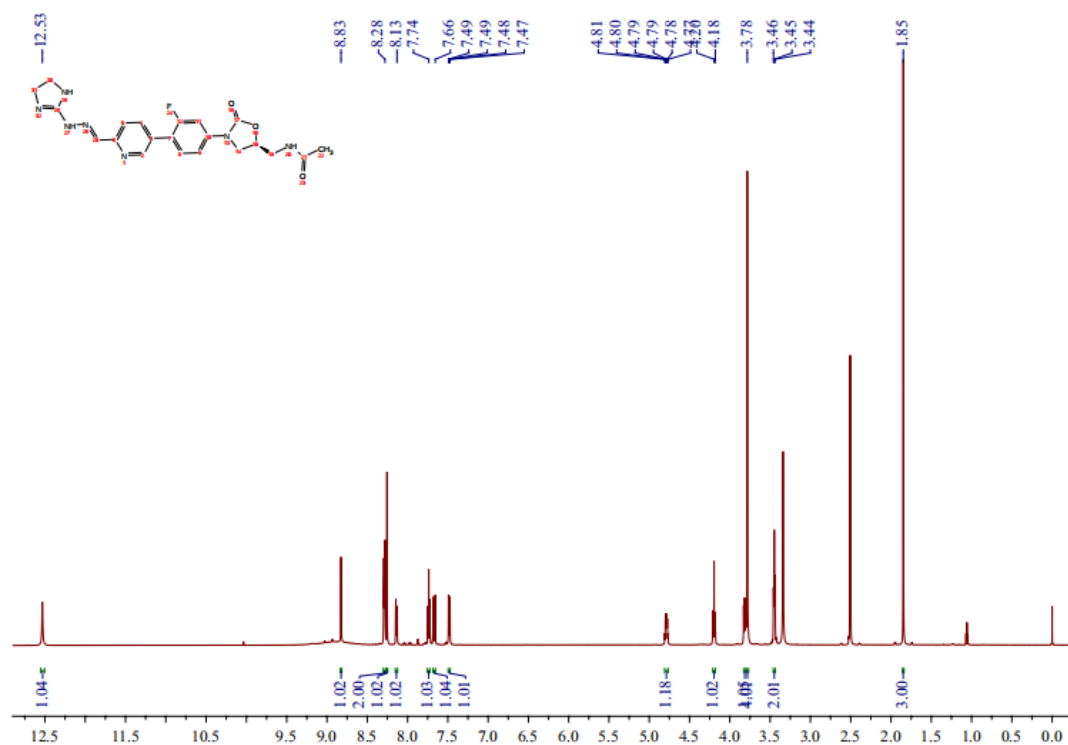

**Compound 13b-3**

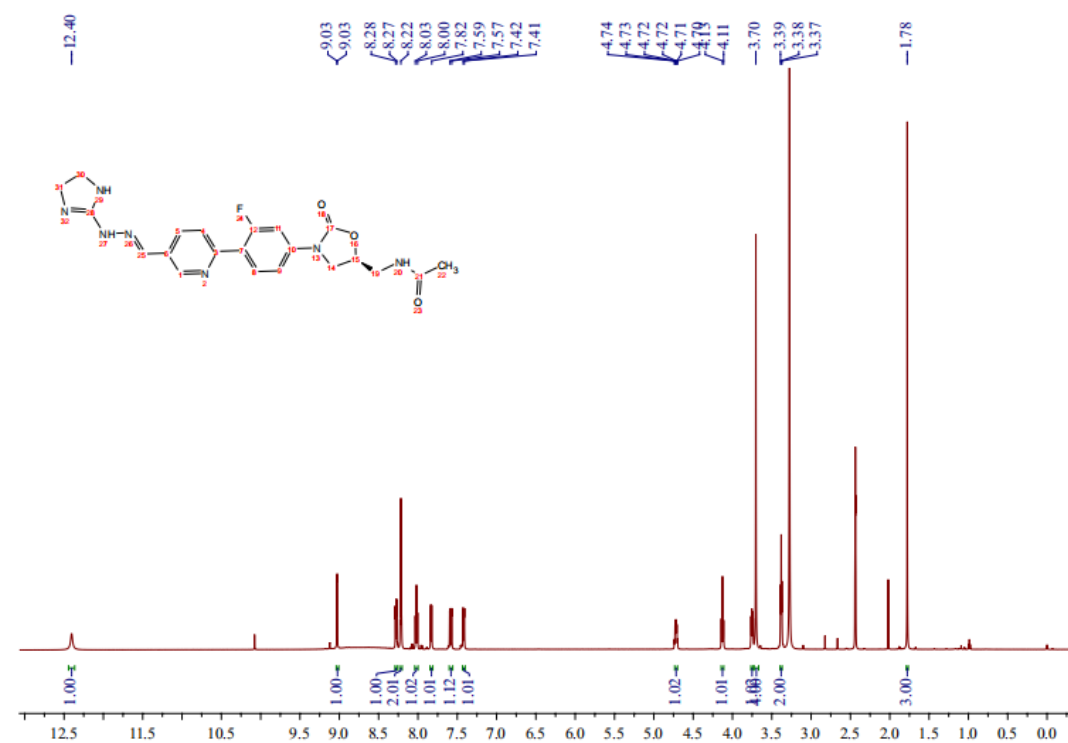

**Compound 13b-4**

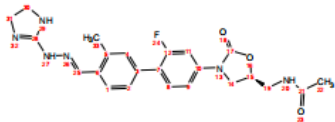

**Chemical structure of 10:** CC(=O)O[C@H]1O[C@@H](c2cc(O)c(O[C@H]3O[C@H](CO)O[C@H]3)c(F)c2)[C@H](O)[C@H](O)[C@H]1O

**<sup>1</sup>H NMR spectrum (DMSO-d<sub>6</sub>):**

| Chemical Shift (ppm) | Integration |
|----------------------|-------------|
| 12.17                | 1.00        |
| 10.21                | 1.00        |
| 8.45                 | 1.03        |
| 8.23                 | 1.04        |
| 8.21                 | 1.03        |
| 7.92                 | 1.04        |
| 7.35                 | 1.01        |
| 7.07                 | 1.02        |
| 7.02                 | 1.01        |
| 7.01                 | 1.02        |
| 4.72                 | 1.05        |
| 4.71                 | 1.02        |
| 4.71                 | 1.02        |
| 4.70                 | 4.02        |
| 4.69                 | 2.00        |
| 4.69                 | 2.00        |
| 4.09                 | 2.00        |
| 3.67                 | 2.00        |
| 3.38                 | 2.00        |
| 3.37                 | 2.00        |
| 3.36                 | 2.00        |
| 1.78                 | 3.00        |

### Compound 13b-6

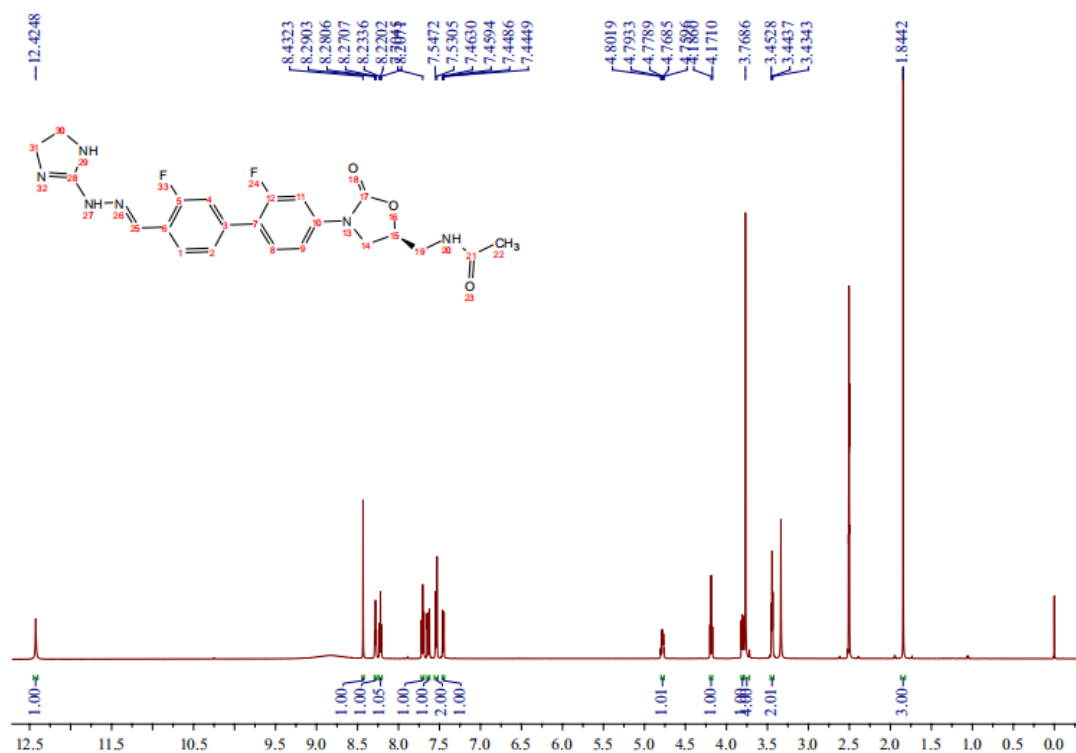

**Compound 14a-1**

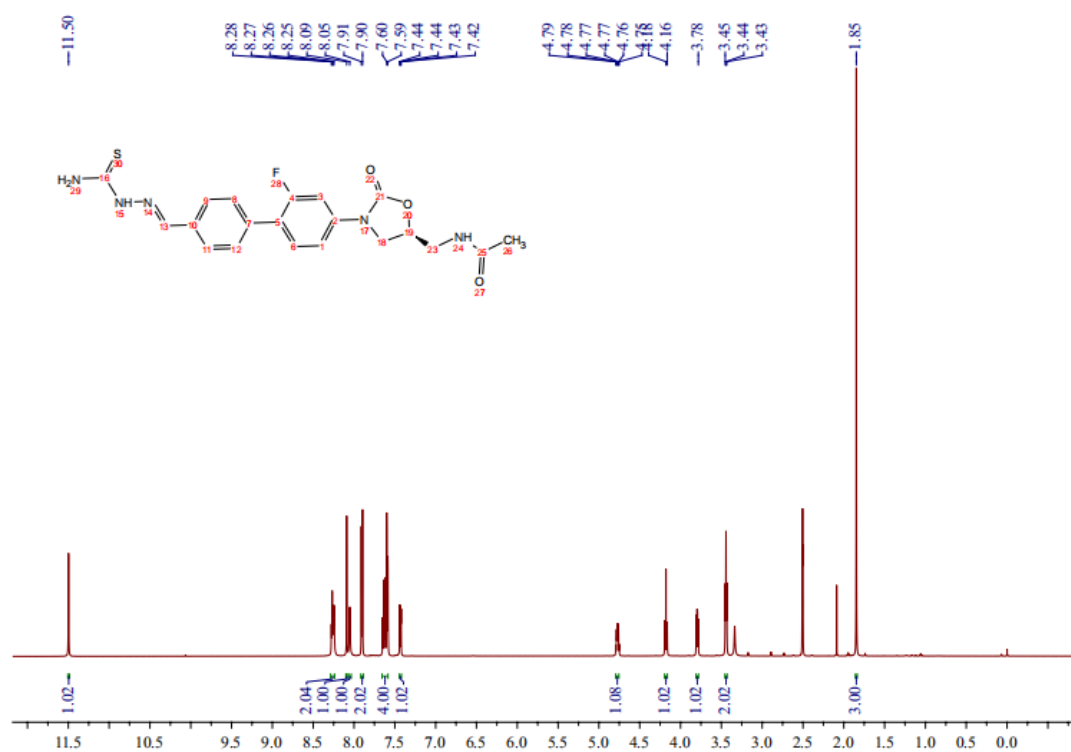

**Compound 14a-2**

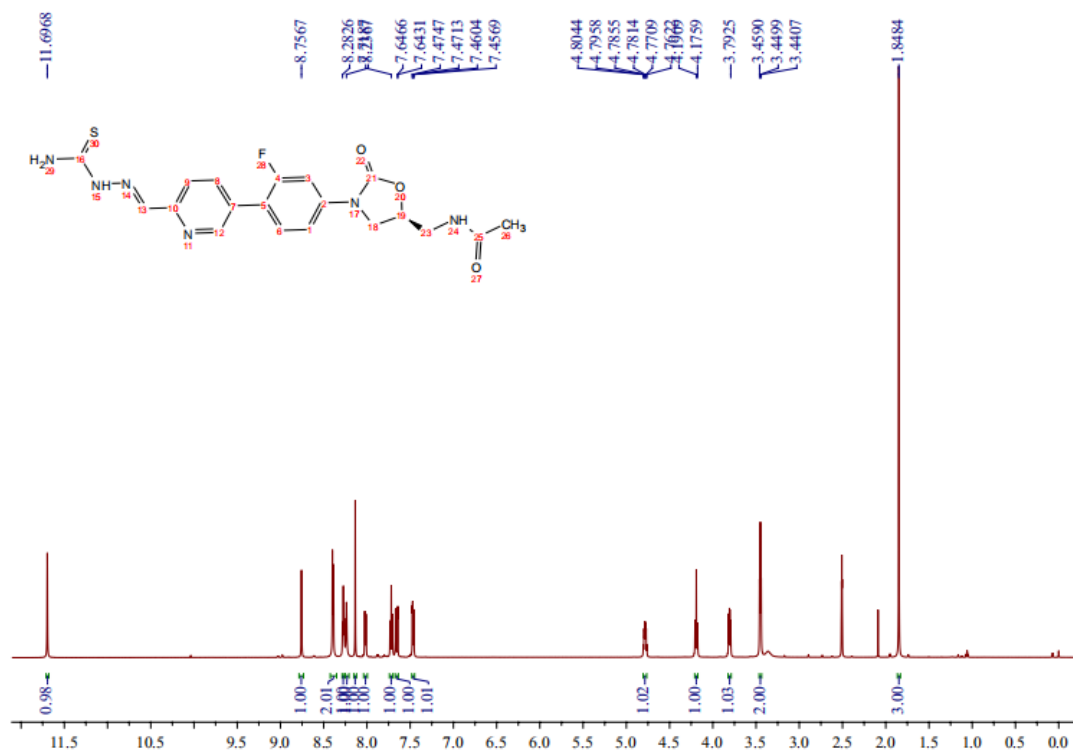

**Compound 14a-3**

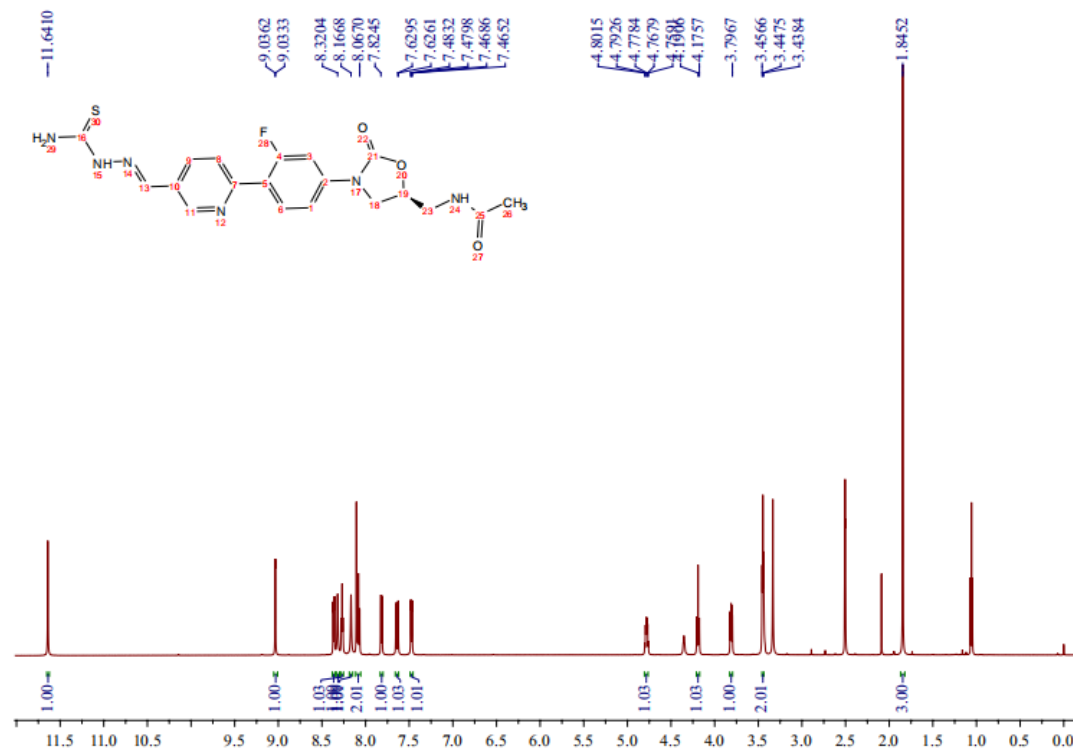

**Compound 14a-4**

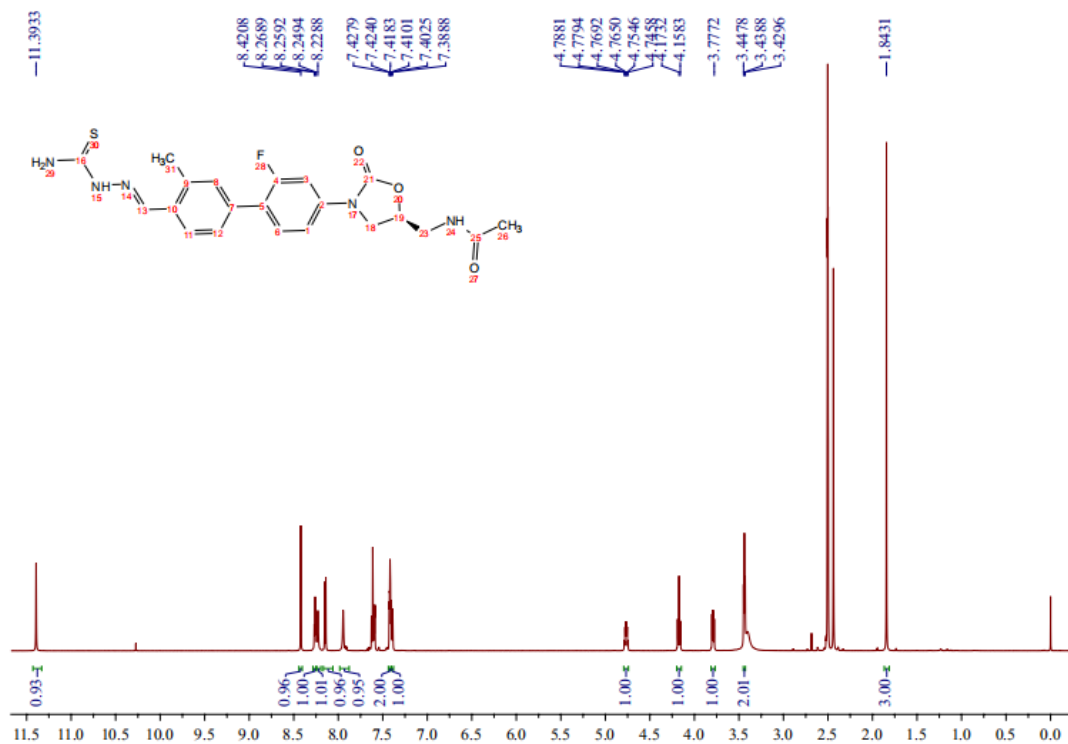

**Compound 14a-5**

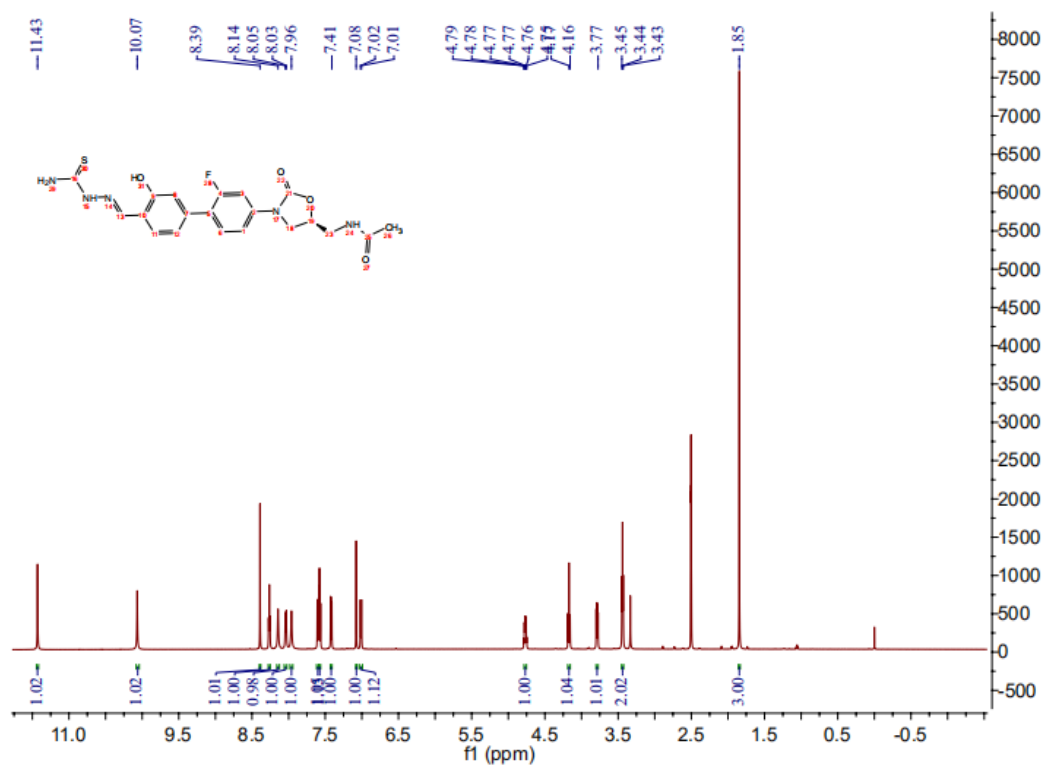

**Compound 14a-6**

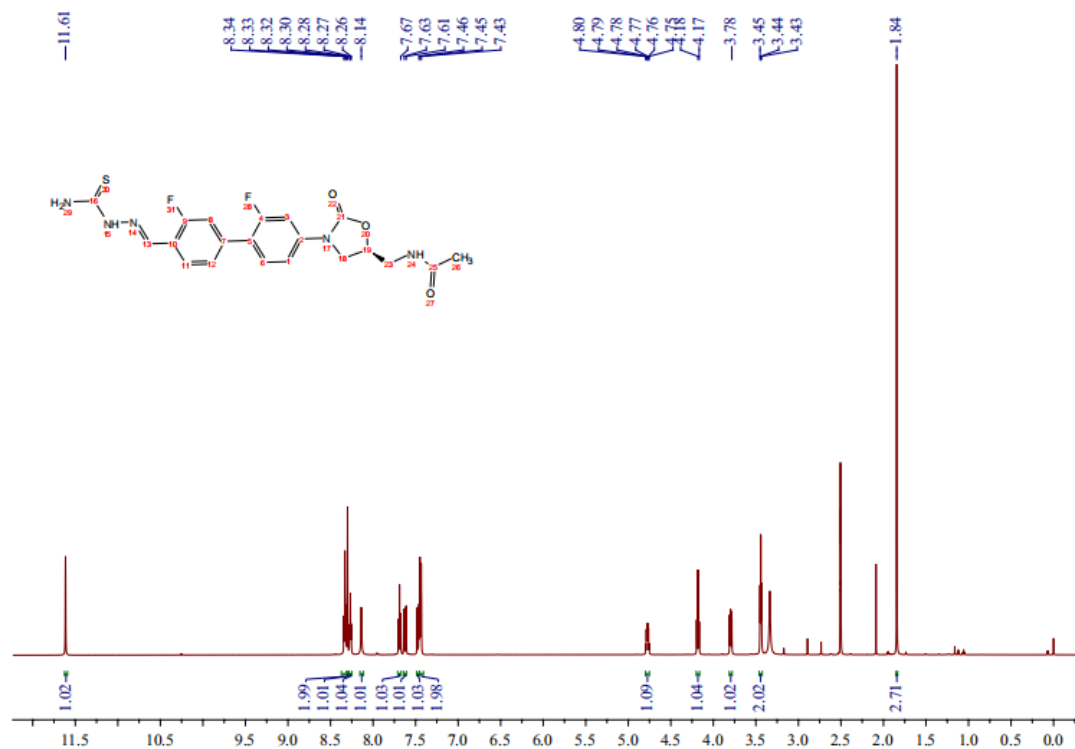

**Compound 14b-1**

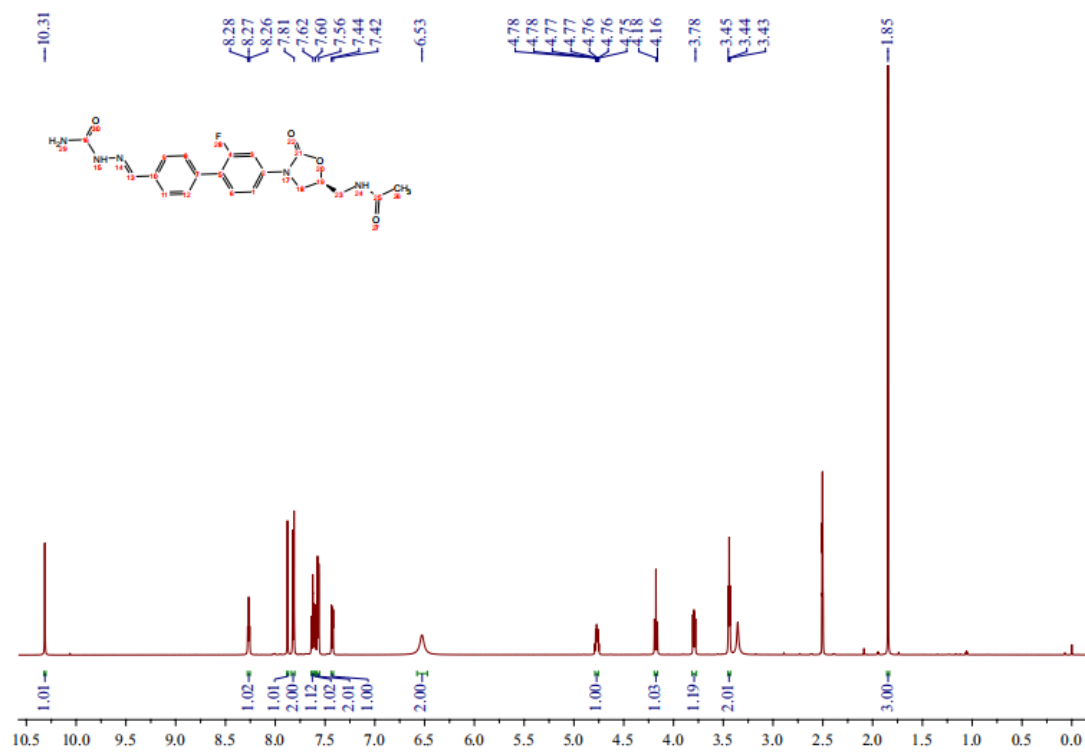

**Compound 14b-2**

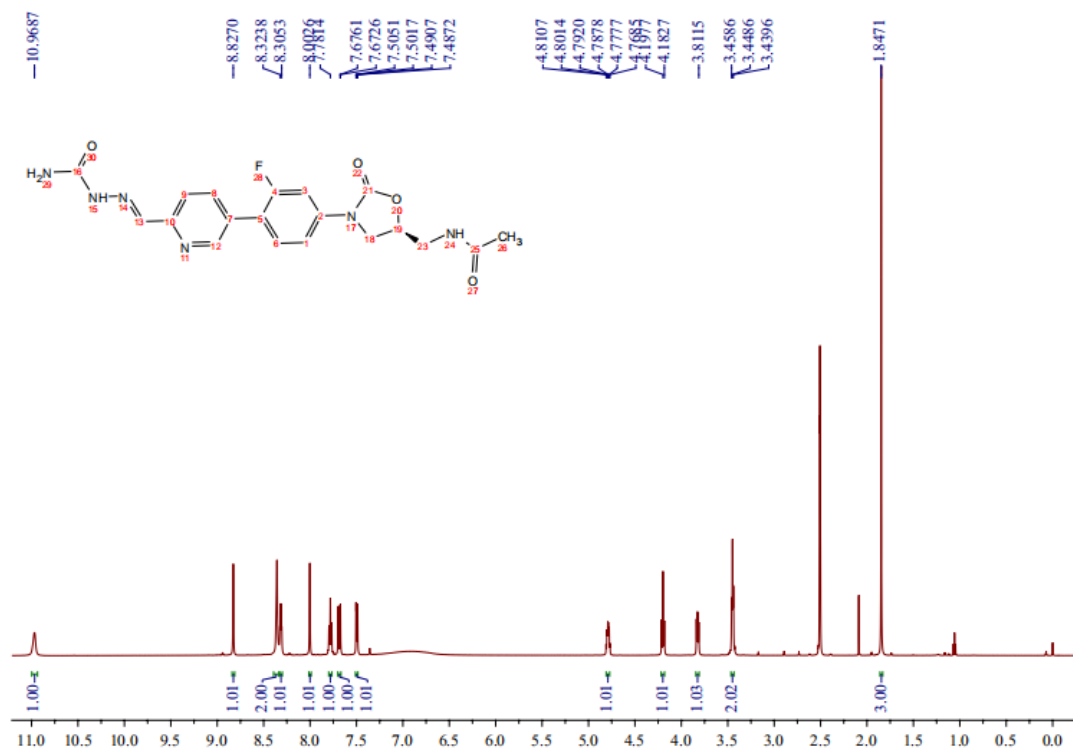

Compound 14b-3

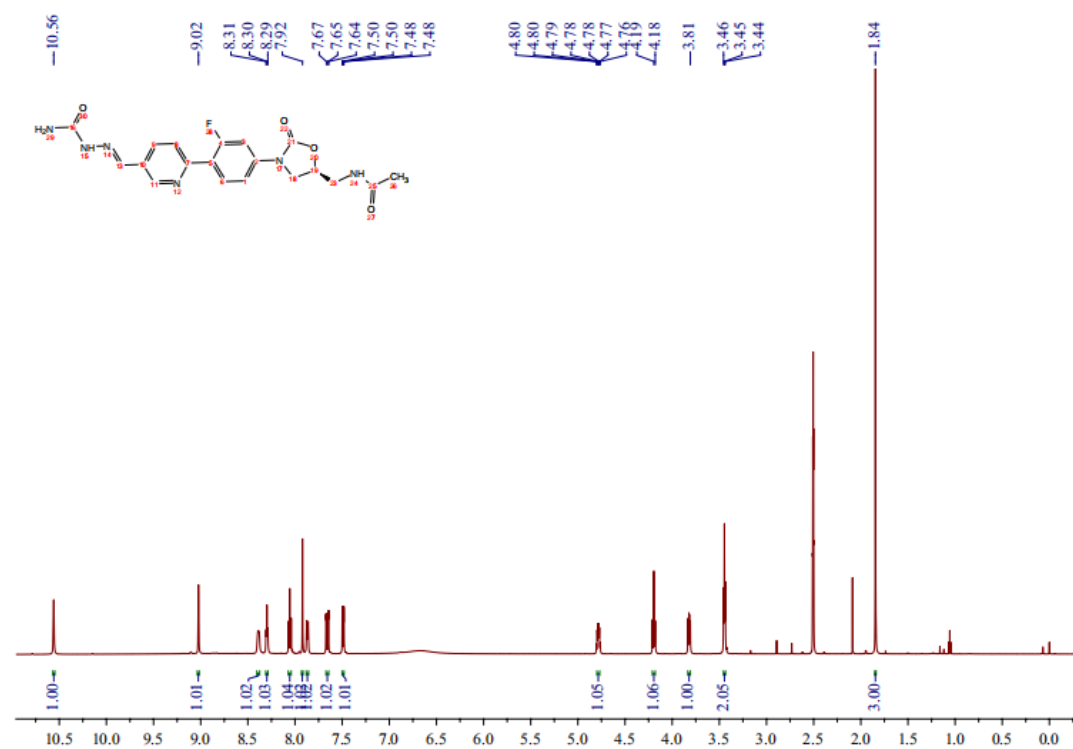

Compound 14b-4



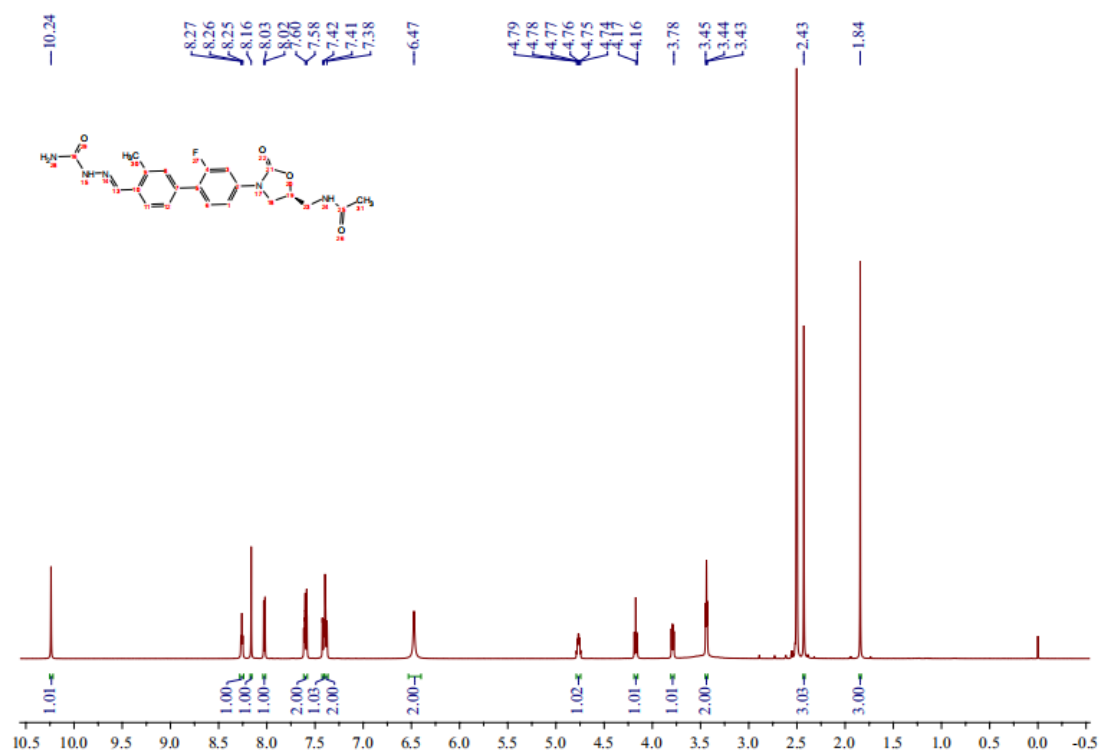

**Compound 14b-5**

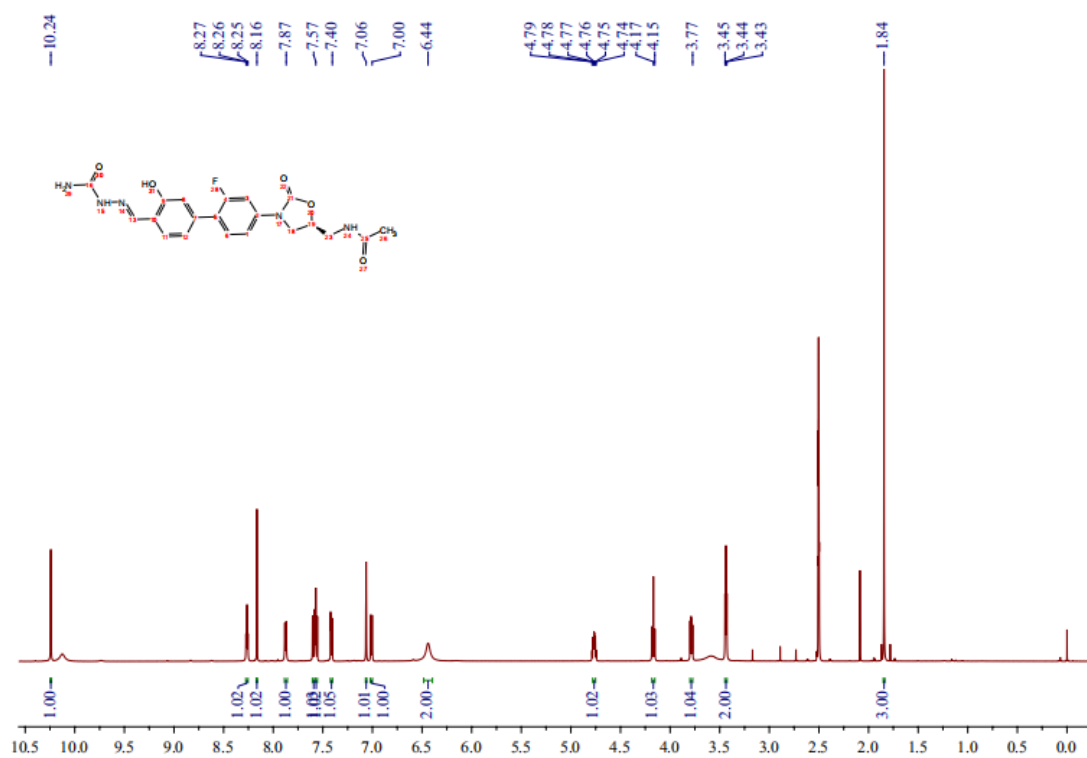

**Compound 14b-6**

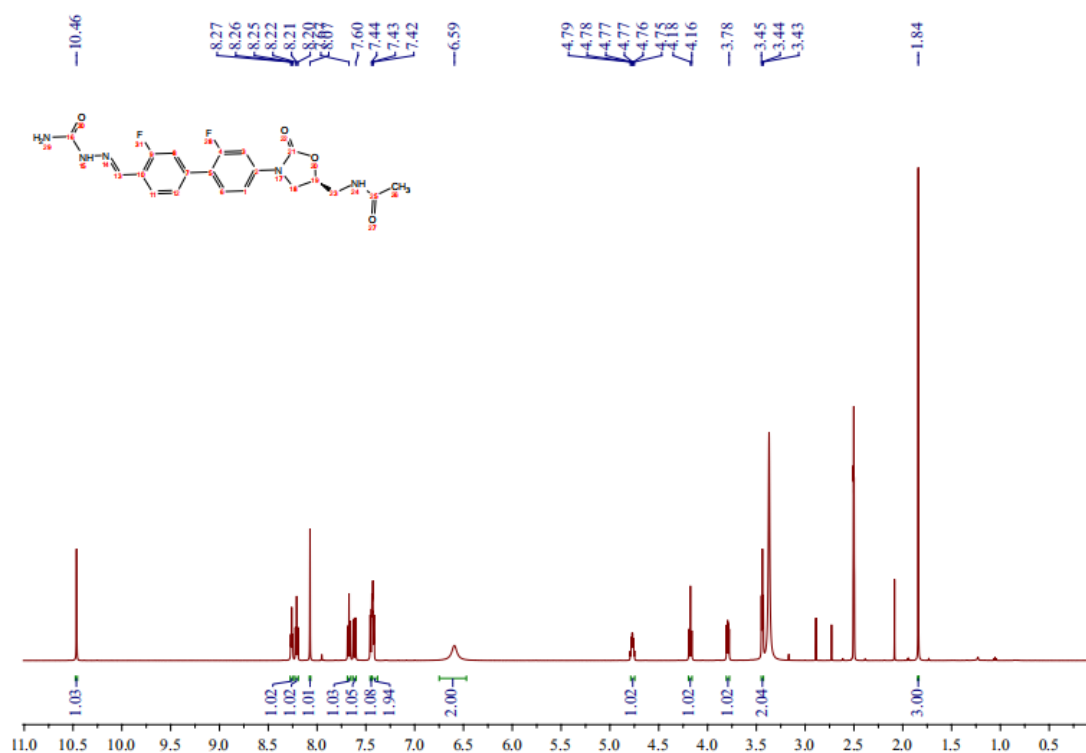

## 2. <sup>13</sup>C-NMR Spectra

### Compound 13a-1

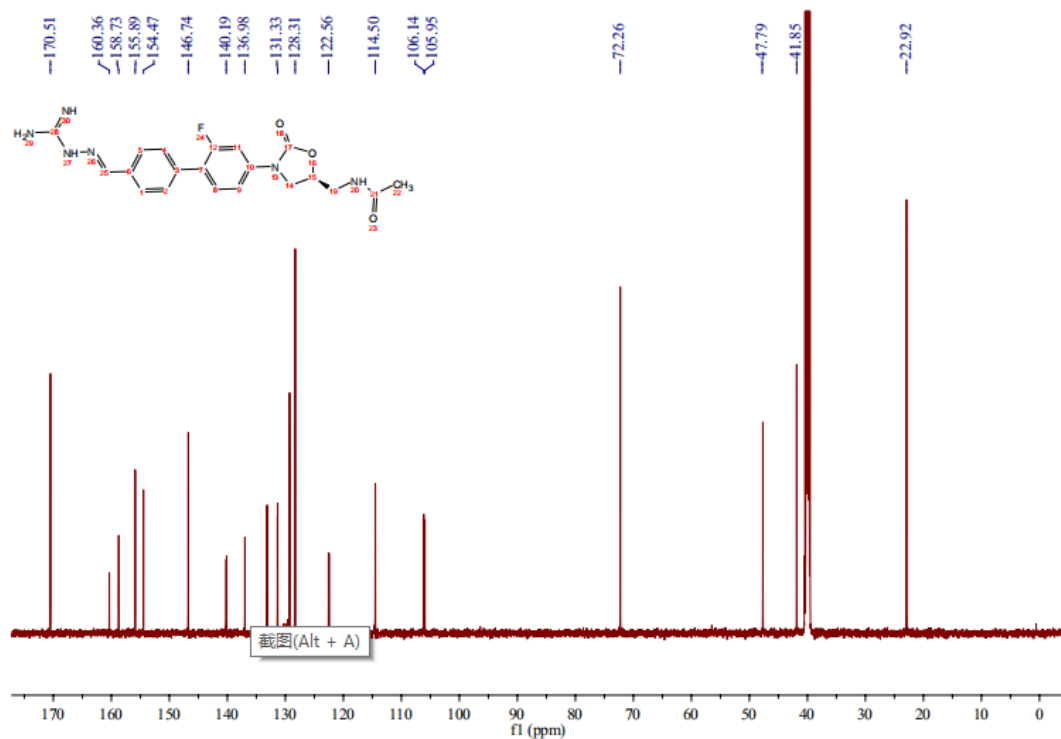

### Compound 13a-2

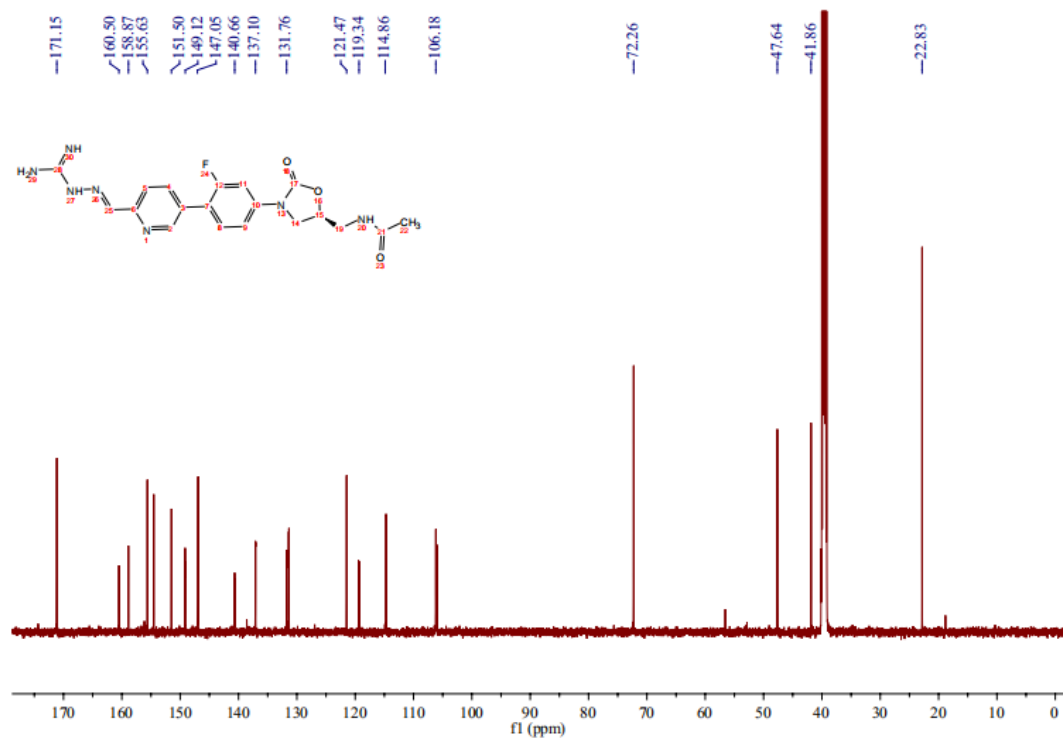

**Compound 13a-3**

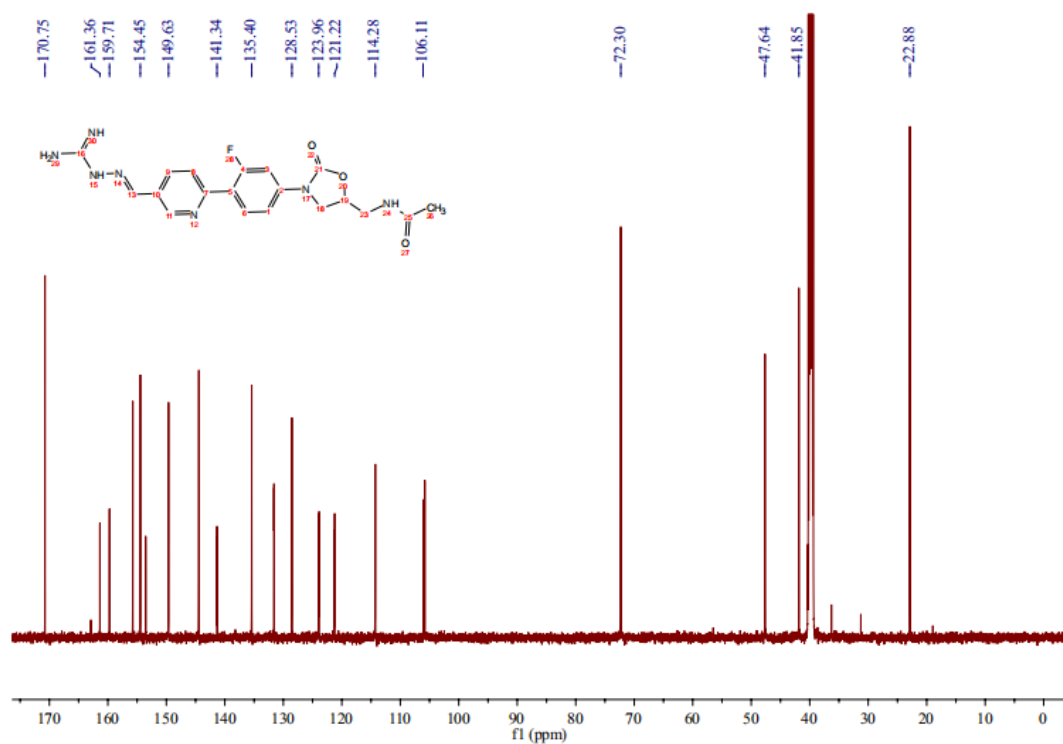

**Compound 13a-4**

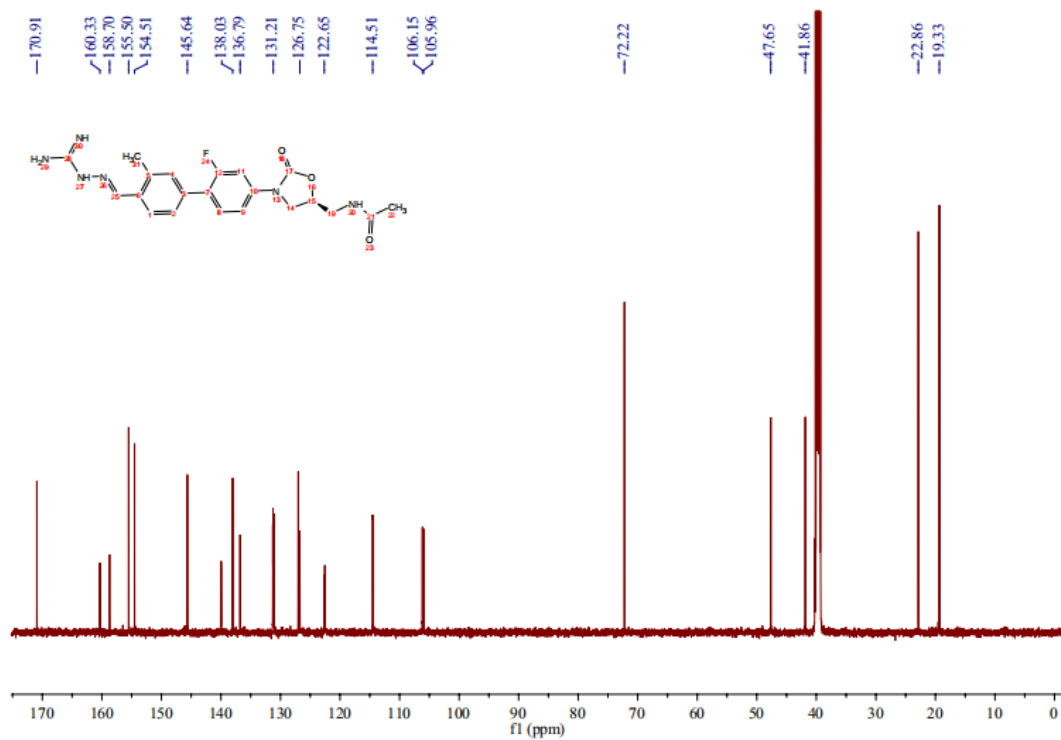

Compound 13a-5

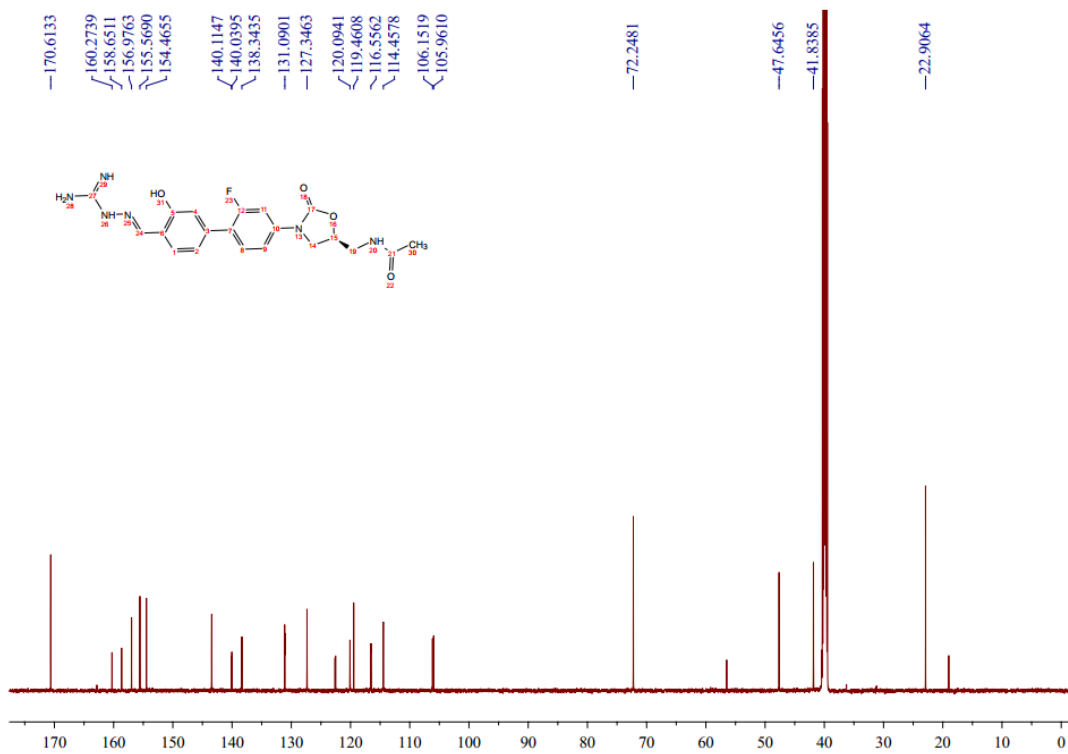

Compound 13a-6

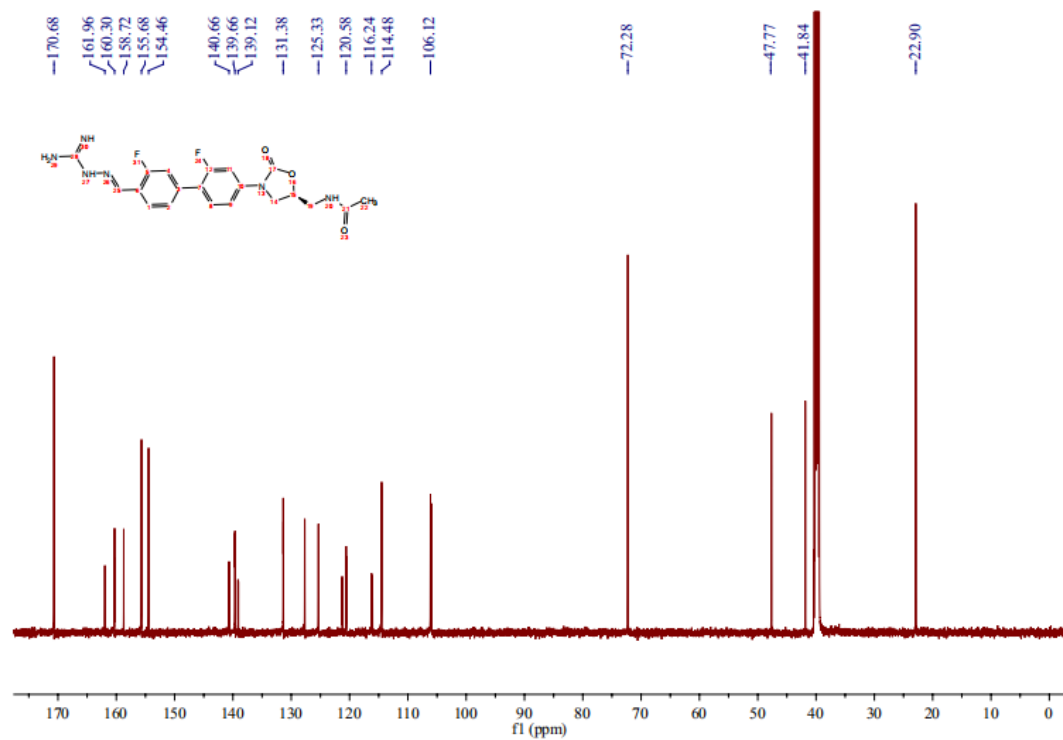

Compound 13b-1

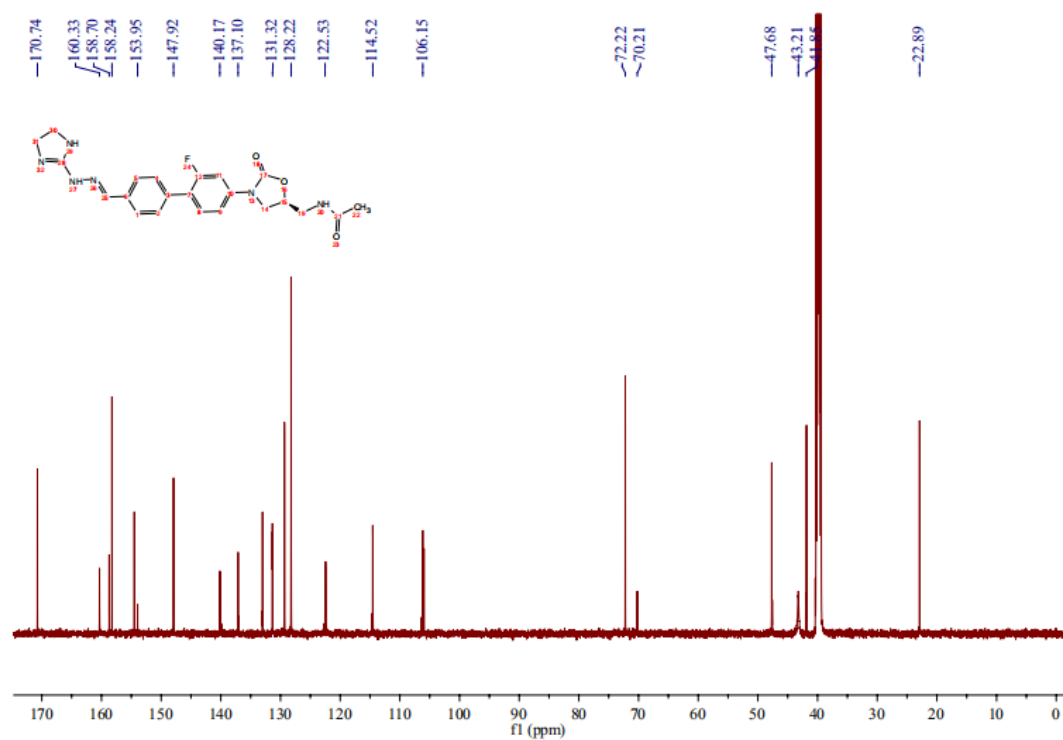

Compound 13b-2

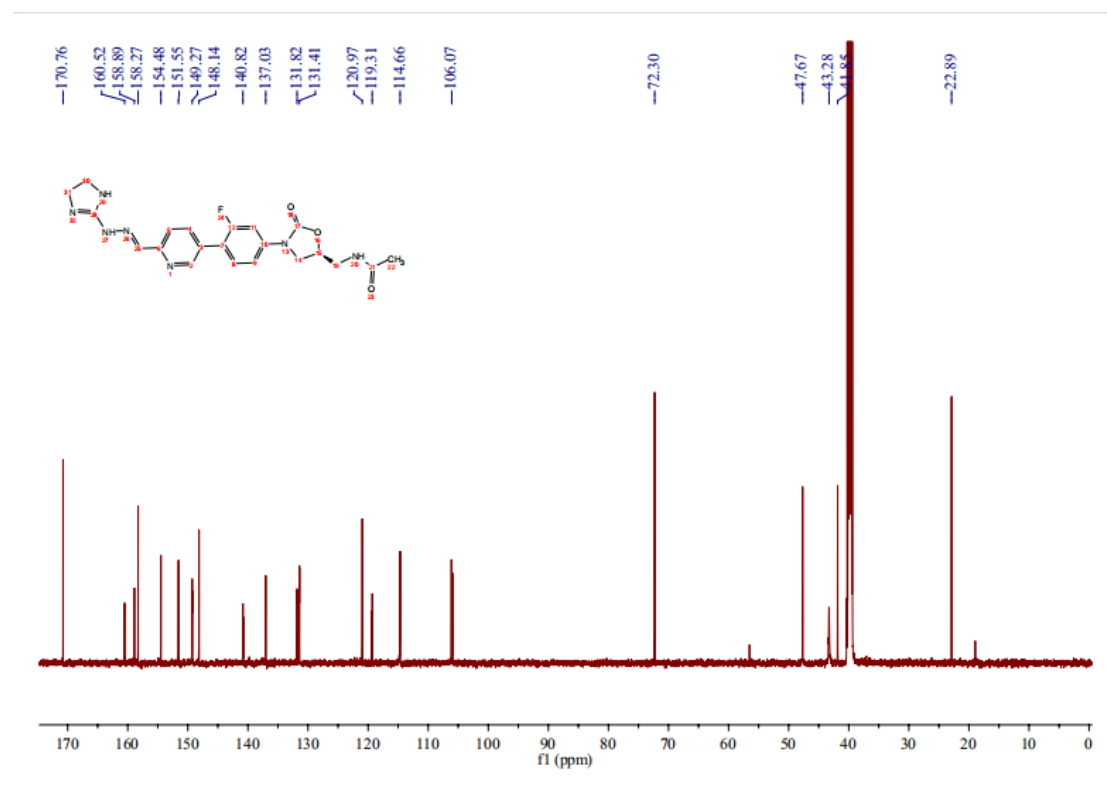

Compound 13b-3

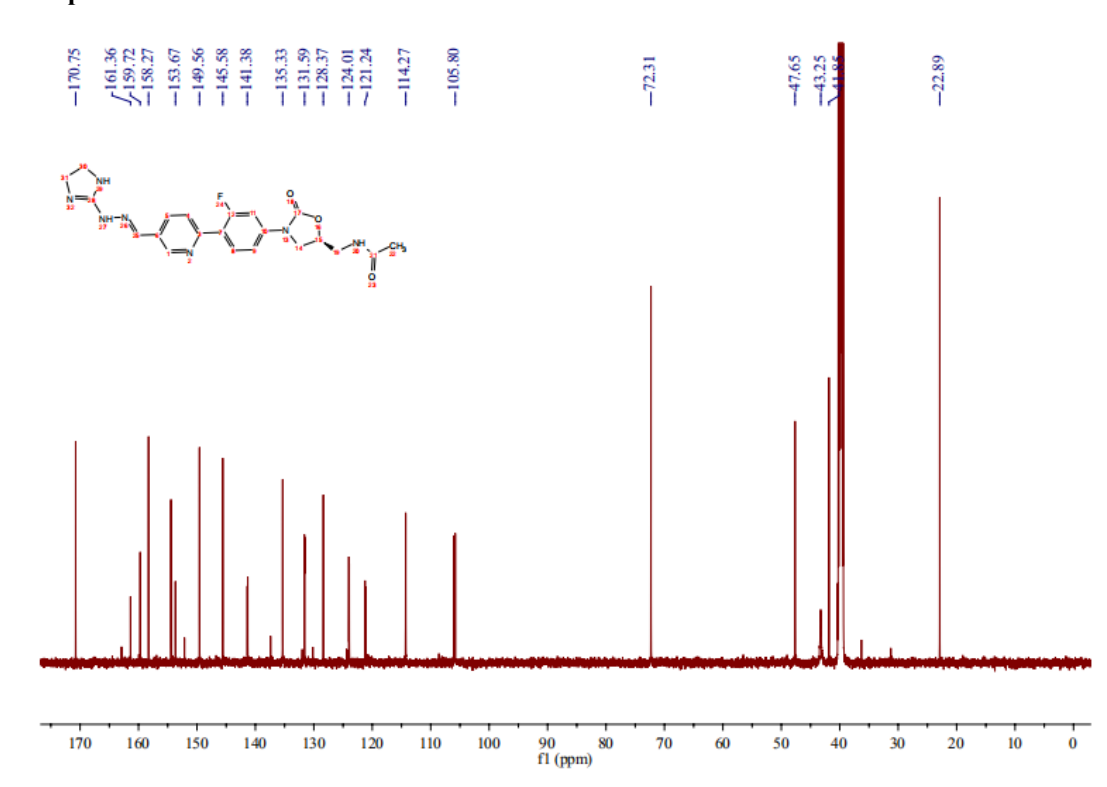

Compound 13b-4



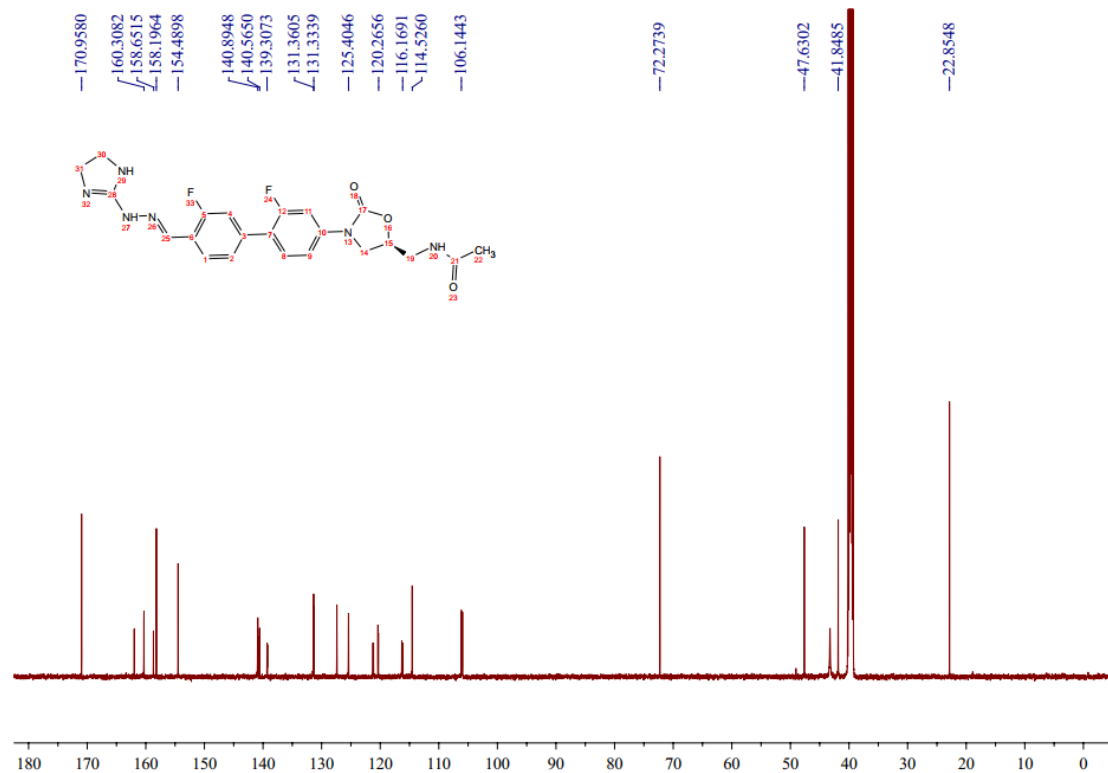

Compound 14a-1

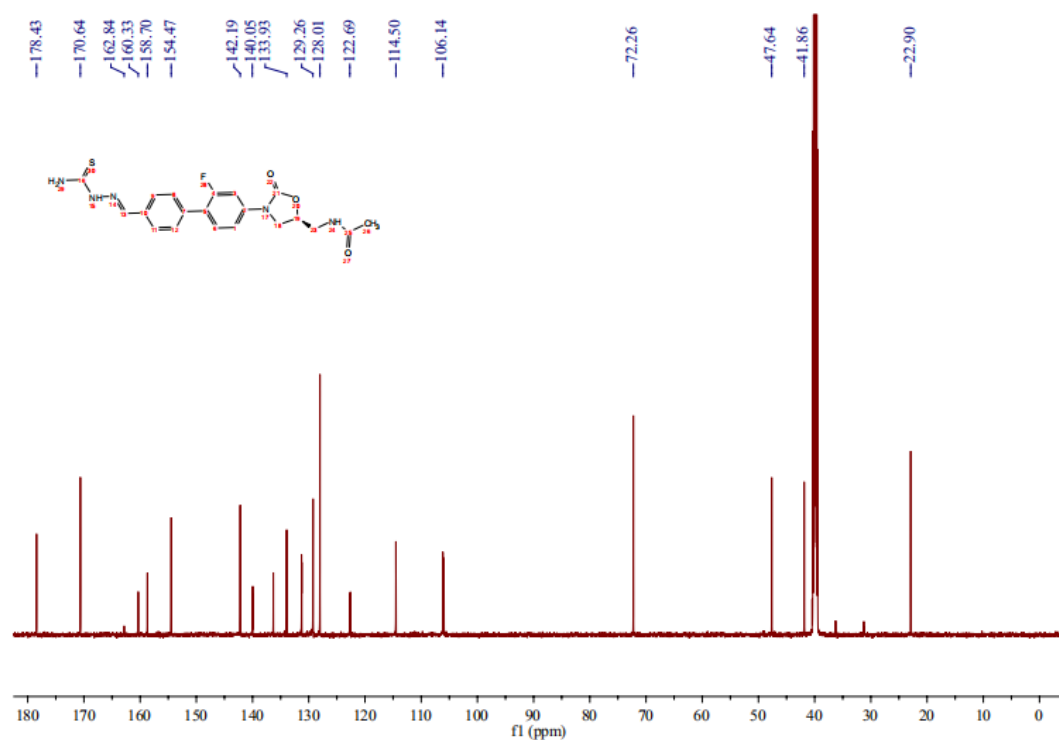

Compound 14a-2



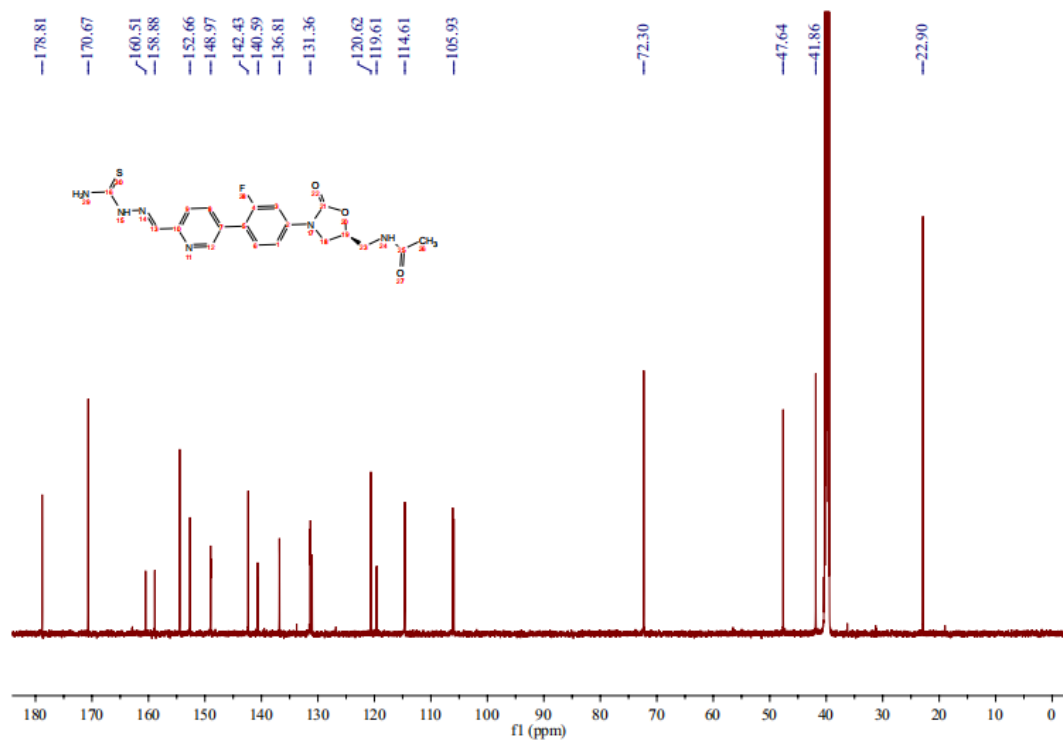

Compound 14a-3

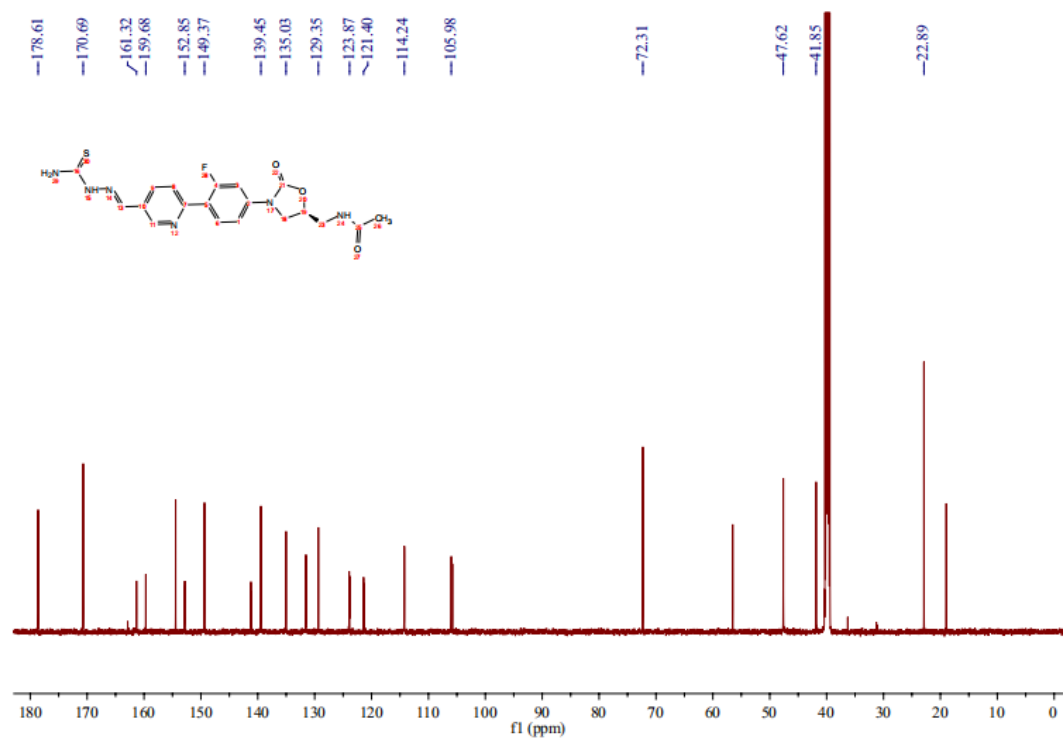

Compound 14a-4

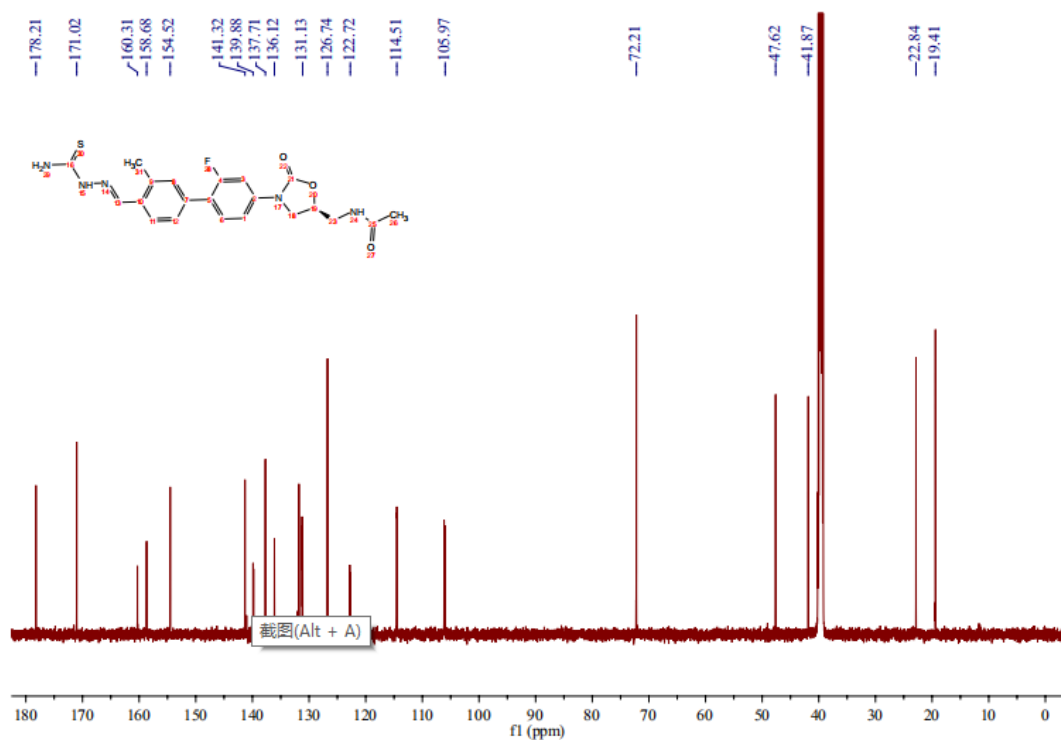

Compound 14a-5

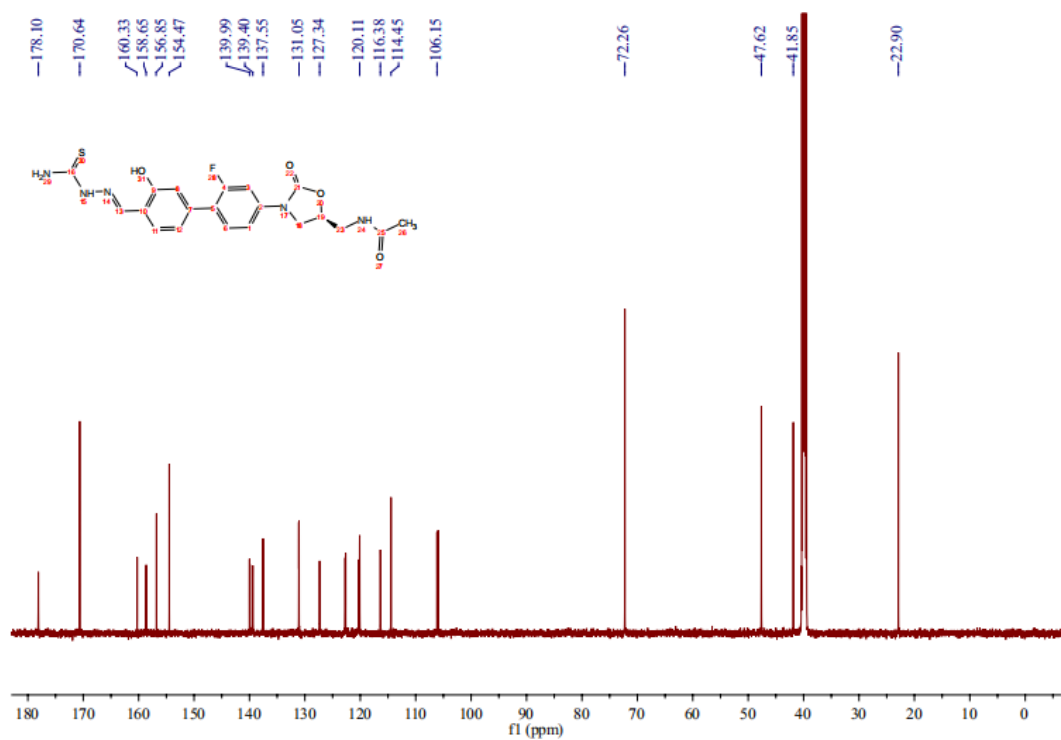

Compound 14a-6

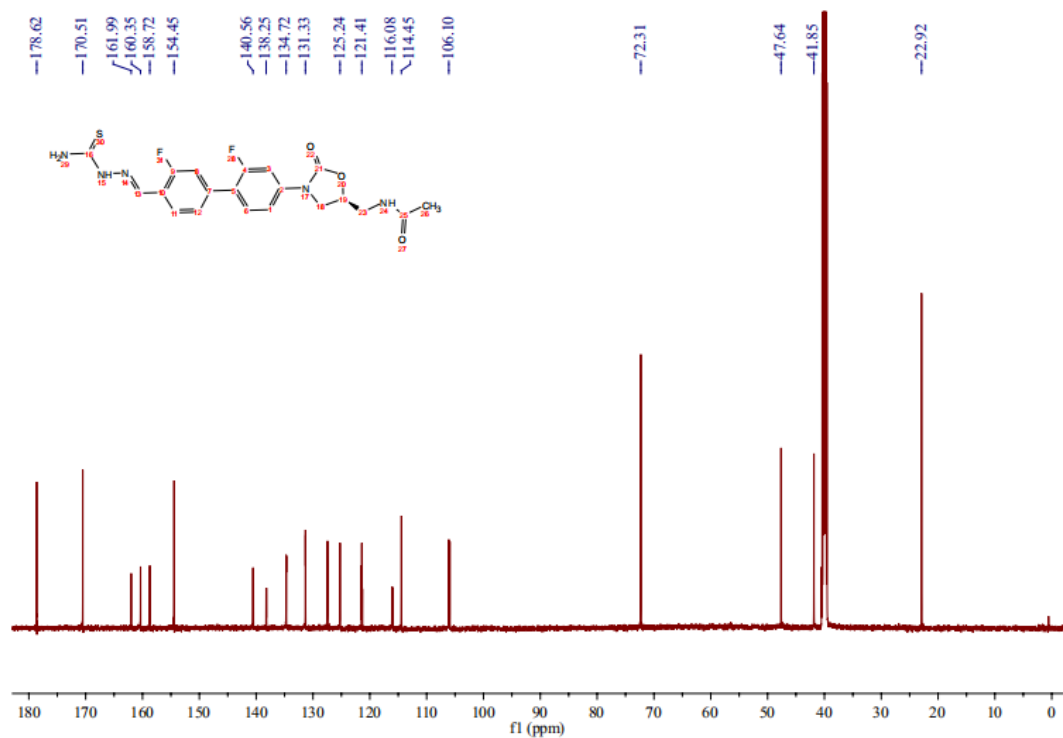

Compound 14b-1

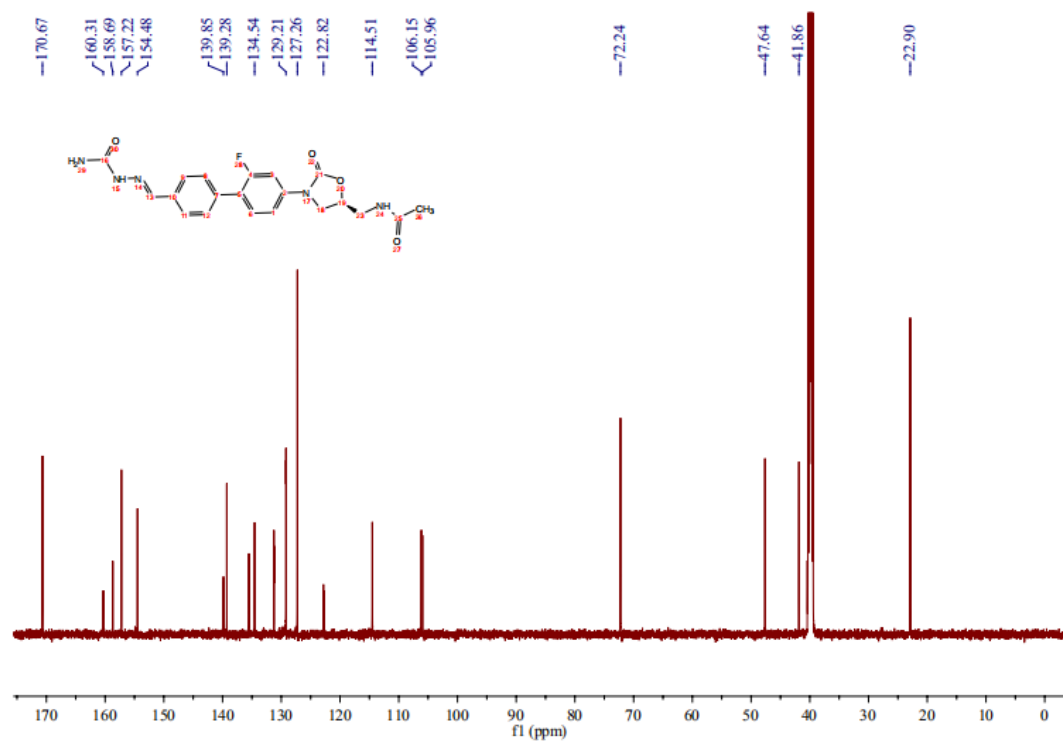

Compound 14b-2

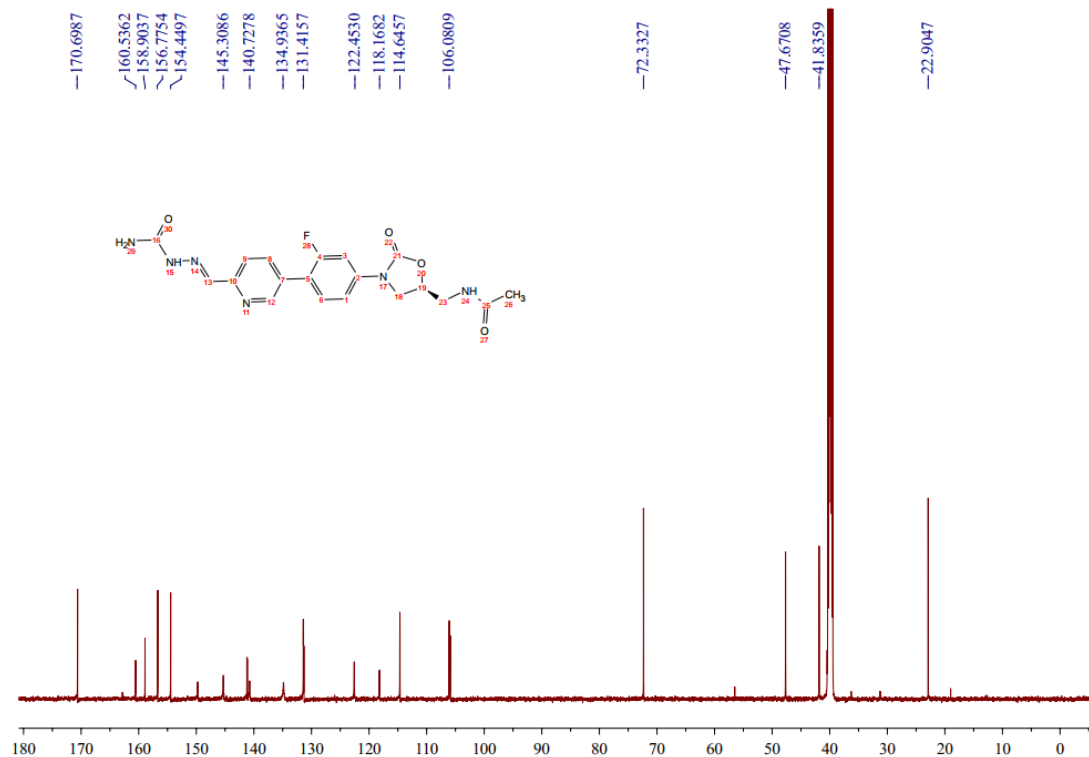

**Compound 14b-3**

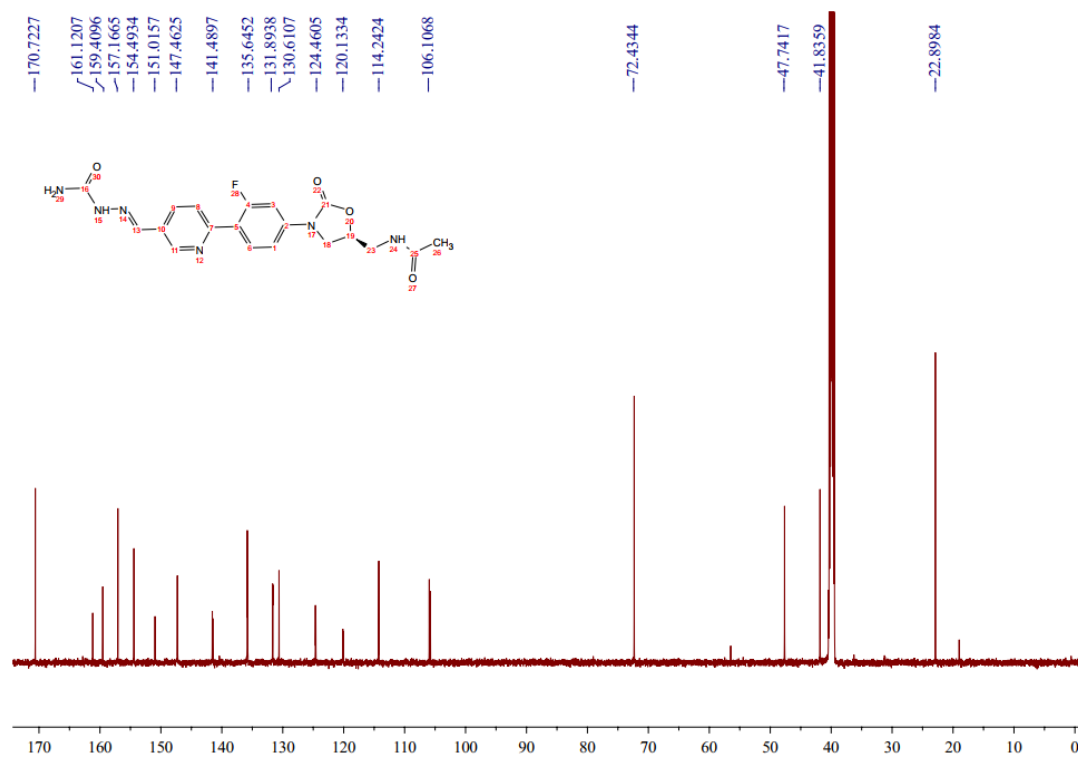

**Compound 14b-4**

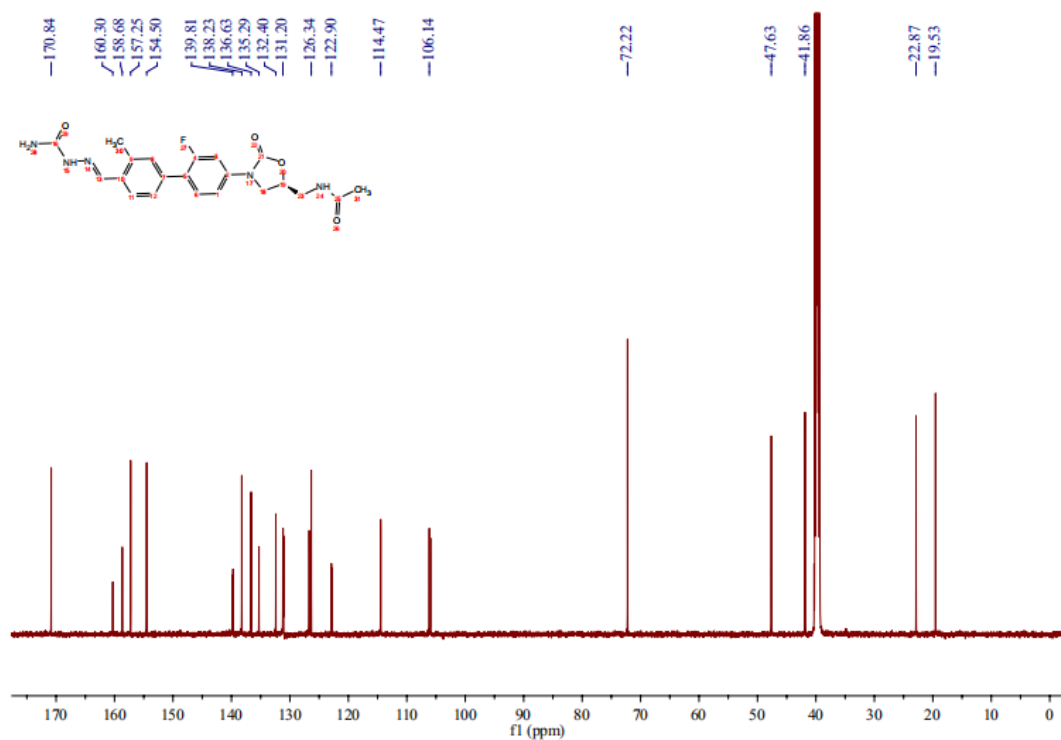

**Compound 14b-5**

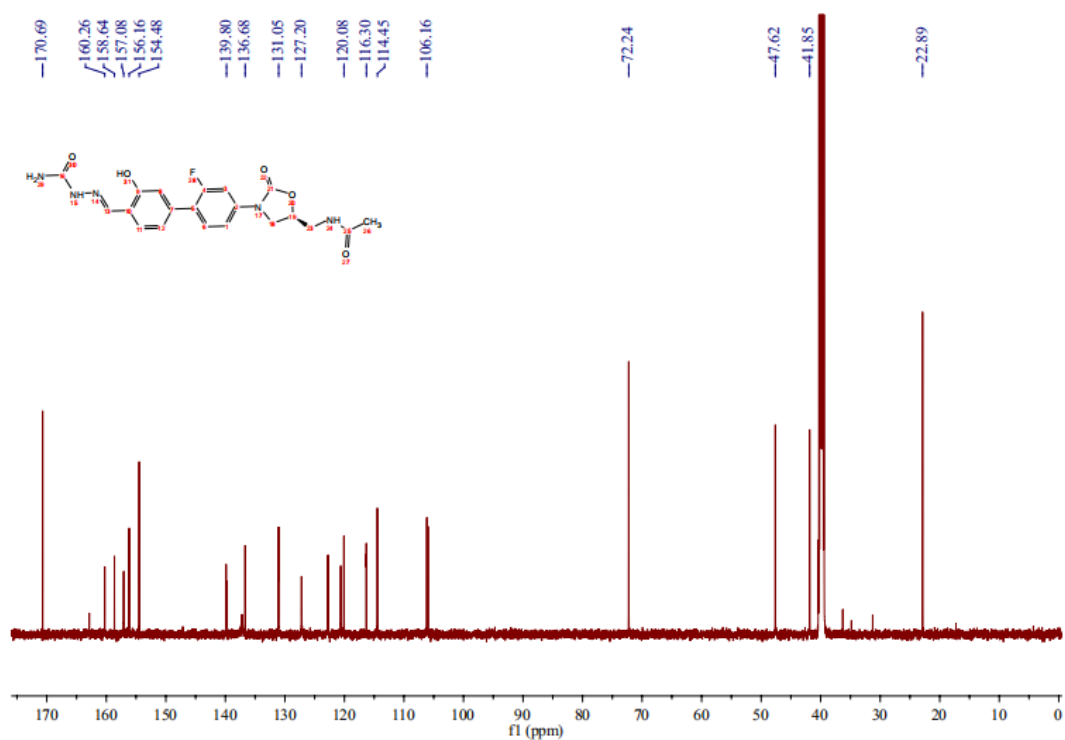

**Compound 14b-6**

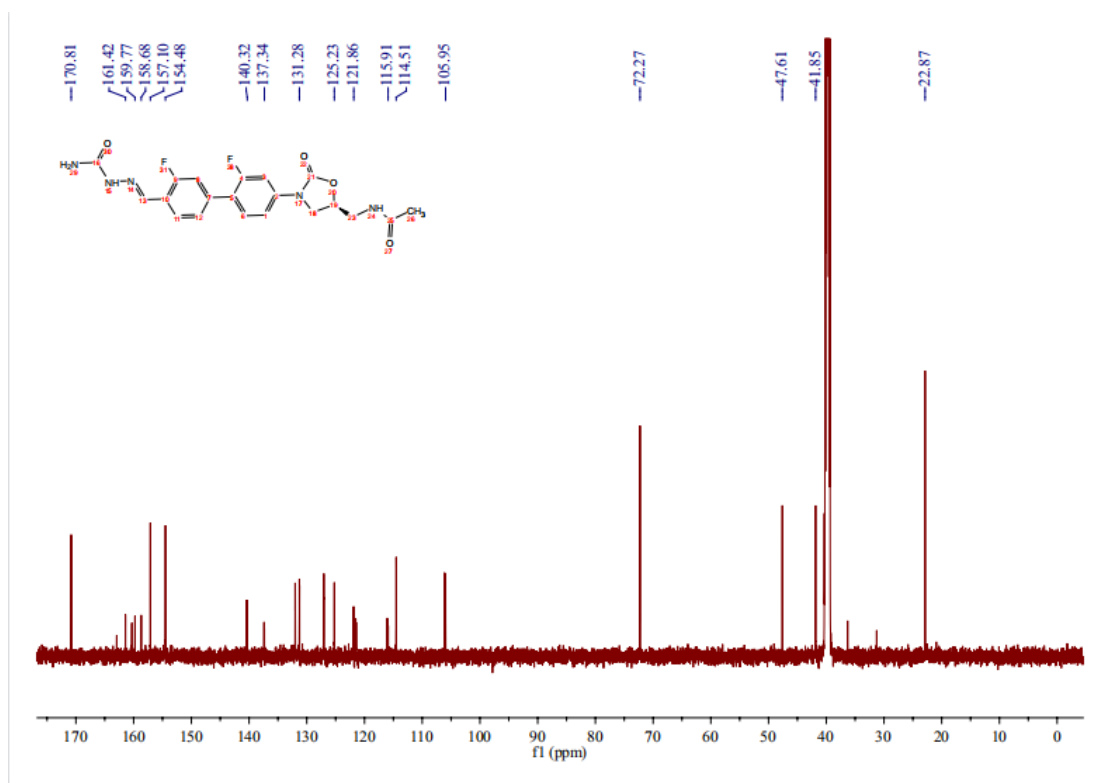

### 3. NOESY spectrum of compound 13b-6

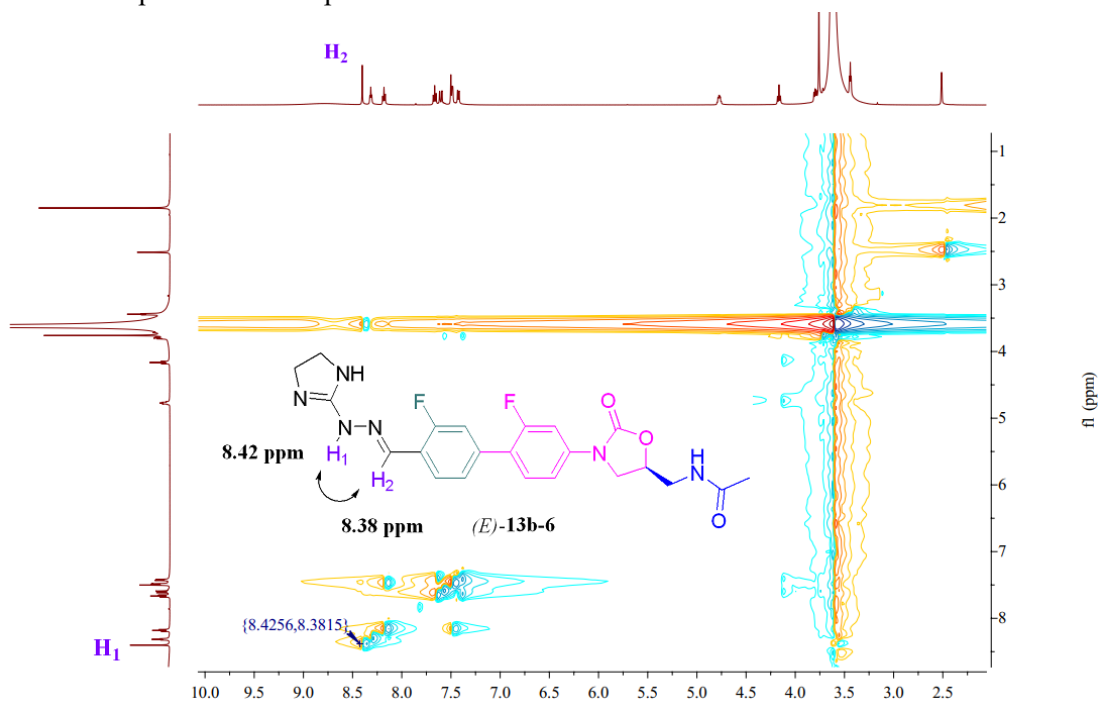

### 4. MS spectrum Compound 13a-1

30-Sep-2019

11:22:26  
QUATTROZQUATTROZQ

1:A,3

QYL 412 0930 21 (0.414)

1: Scan ES+  
1.34e8

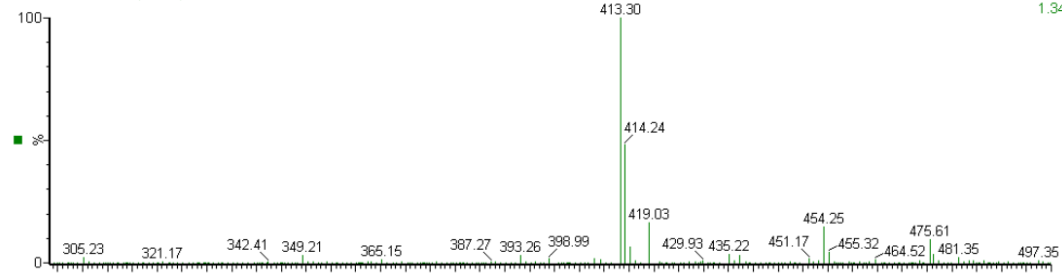

## Compound 13a-2

17-Sep-2019

12:18:46  
QUATTROZQUATTROZQ

1:B,7

QYLA 413 0917 18 (0.354)

1: Scan ES+  
7.65e7

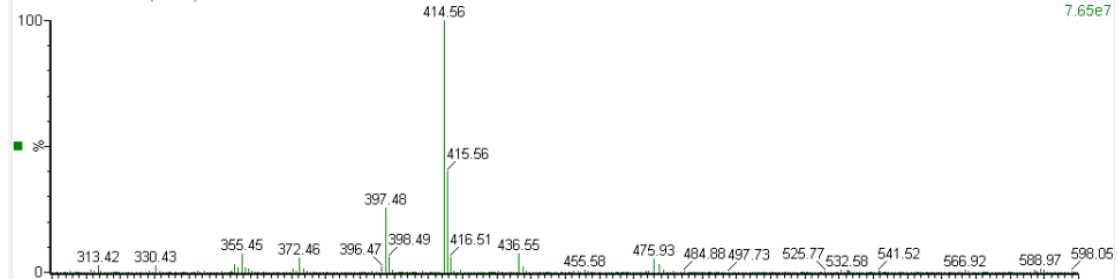

## Compound 13a-3

11-Nov-2019

14:29:07  
QUATTROZQUATTROZQ

1:E,1

QYL 413 1111 25 (0.495)

1: Scan ES+  
2.09e8

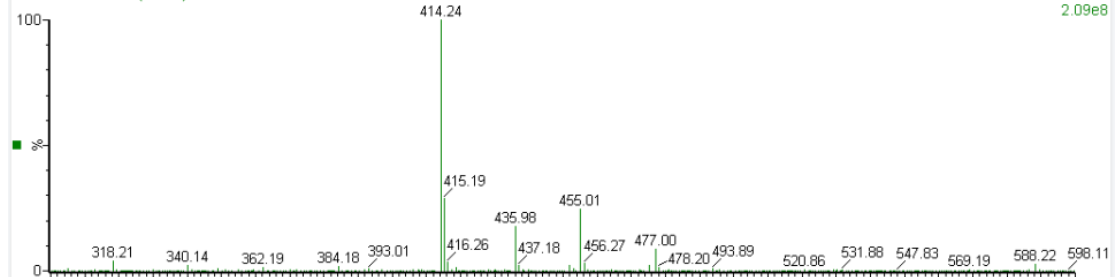

## Compound 13a-4

01-Nov-2019

17:04:04  
QUATTROZQUATTROZQ

1:B,5

QYL 426 1101 27 (0.535)

1: Scan ES+  
4.25e6

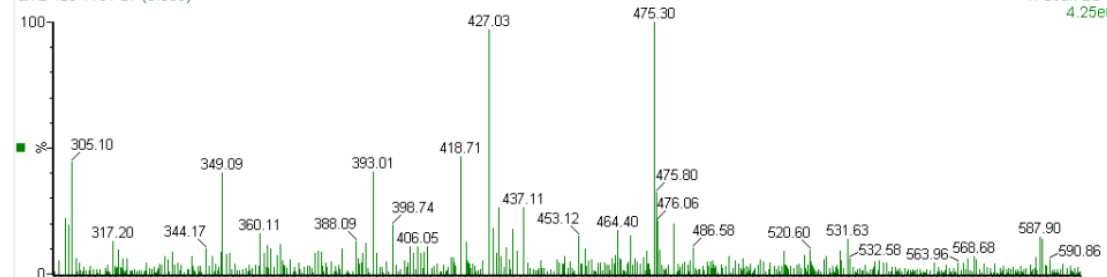

## Compound 13a-5

14-Nov-2019

14:48:47  
QUATTROZQUATTROZQ

1:E,5

QYL 428 1114 21 (0.414)

1: Scan ES+  
2.30e8

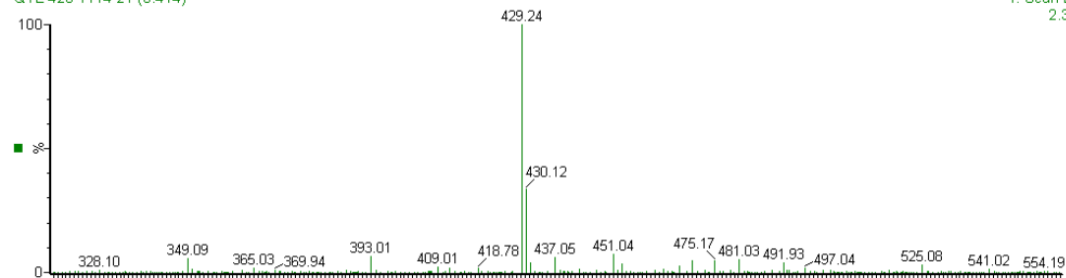

## Compound 13a-6

13-Nov-2019

12:23:31  
QUATTROZQUATTROZQ

1:C,3

QYL 430 1113 24 (0.475)

1: Scan ES+  
9.35e6

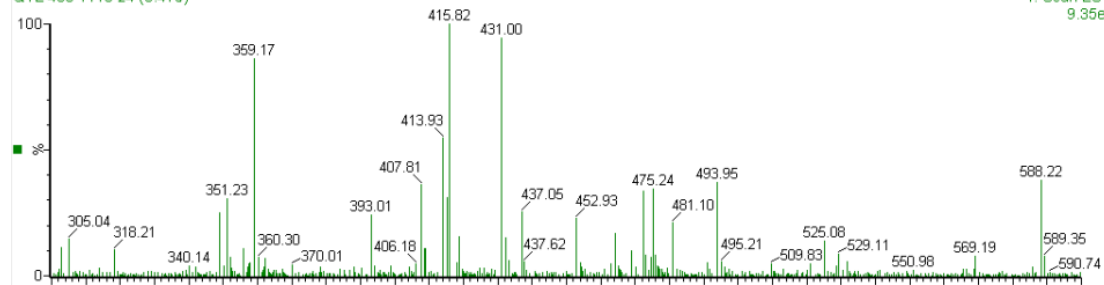

## Compound 13b-1

QYL A5 474 0107 21 (0.424)

2: Scan ES-  
4.51e4

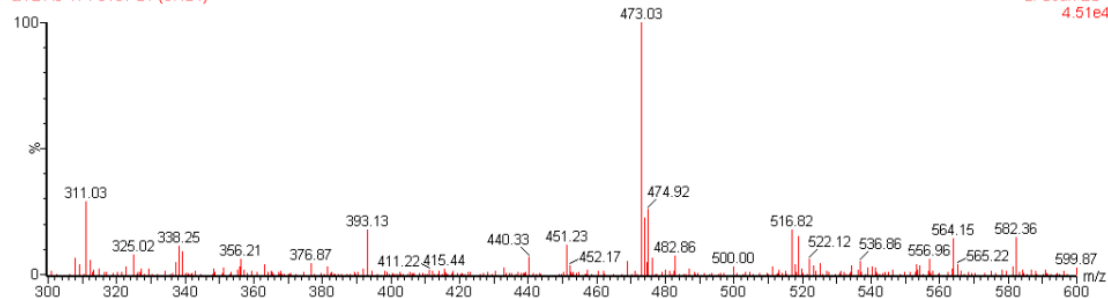

## Compound 13b-2

01-Nov-2019

17:27:51  
QUATTROZQUATTROZQ

1:C,1

QYL 439 1101 29 (0.576)

1: Scan ES+  
1.71e8

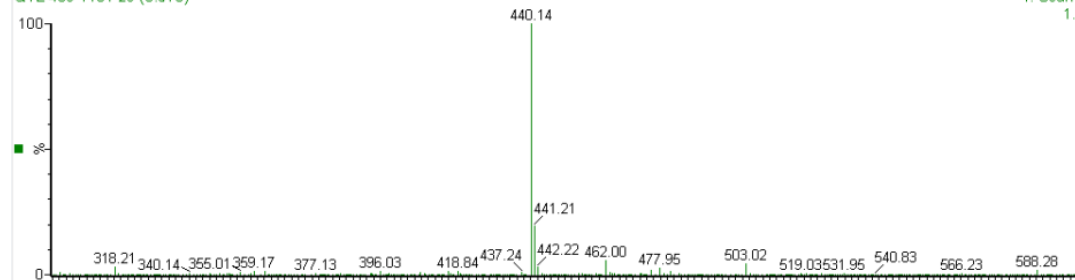



### Compound 13b-3

QYL A3 463 0107 20 (0.404)

2: Scan ES-  
1.77e5

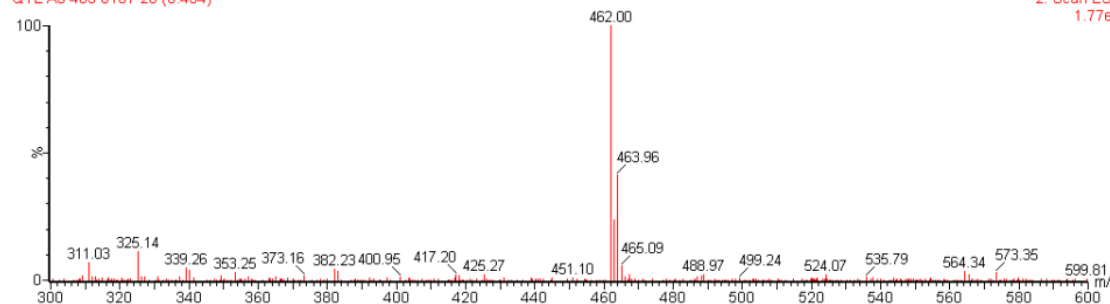

### Compound 13b-4

18-Nov-2019

14:29:28  
QUATTROZQUATTROZQ

1:E,3

QYL 452 1118 27 (0.535)

1: Scan ES+  
2.00e8

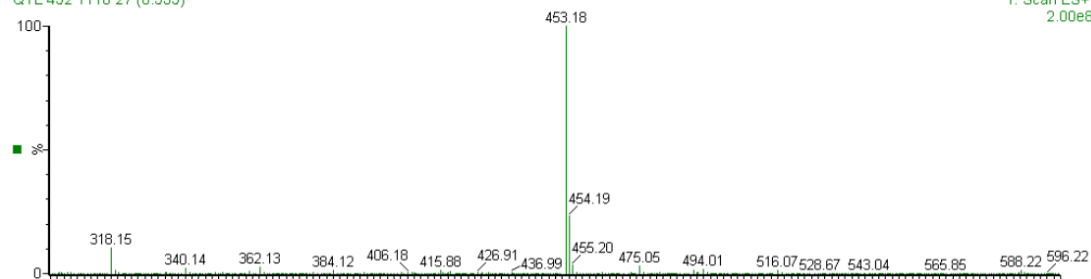

### Compound 13b-5

14-Nov-2019

14:54:43  
QUATTROZQUATTROZQ

1:E,6

QYL 454 1114 25 (0.495)

1: Scan ES+  
1.48e8

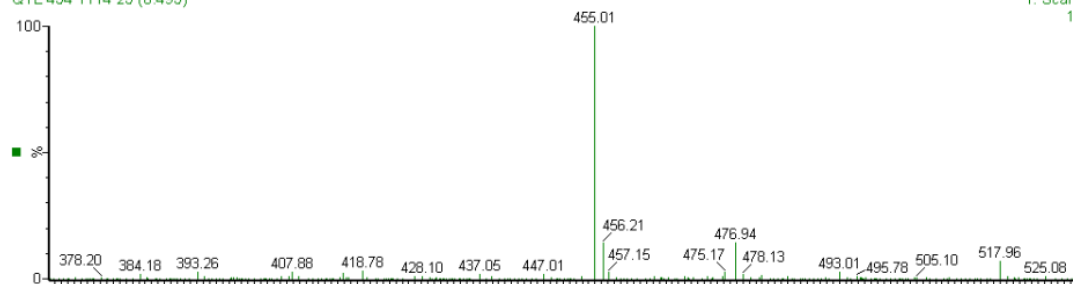

### Compound 13b-6

07-Jan-2020

12:35:50  
QUATTROZQUATTROZQ

1:B,6

QYL A8 456 0107 37 (0.737)

1: Scan ES+  
2.22e8

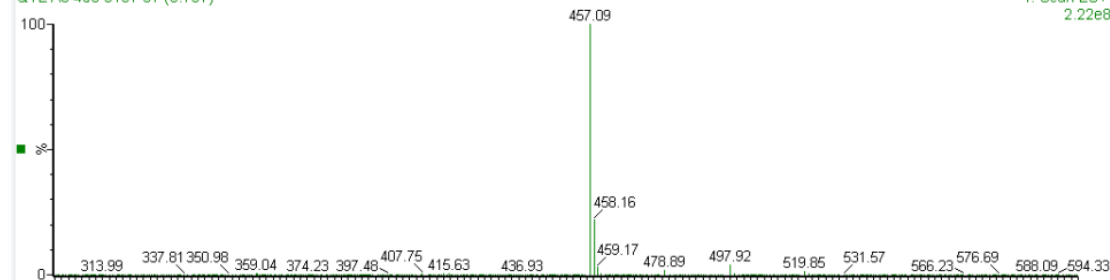

### Compound 14a-1

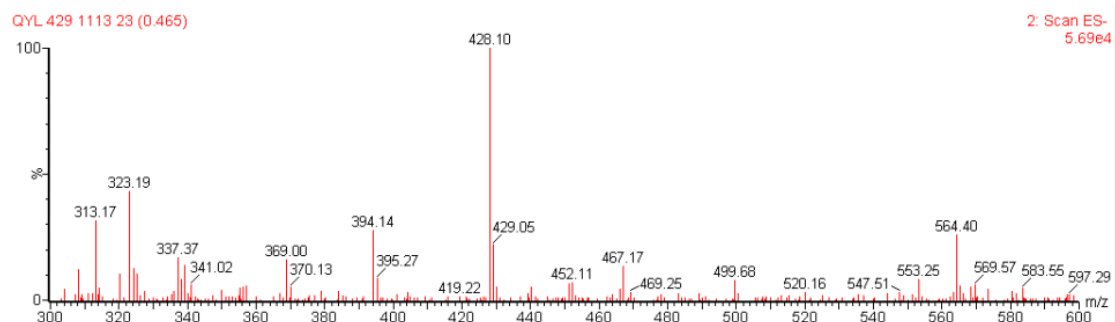

### Compound 14a-2

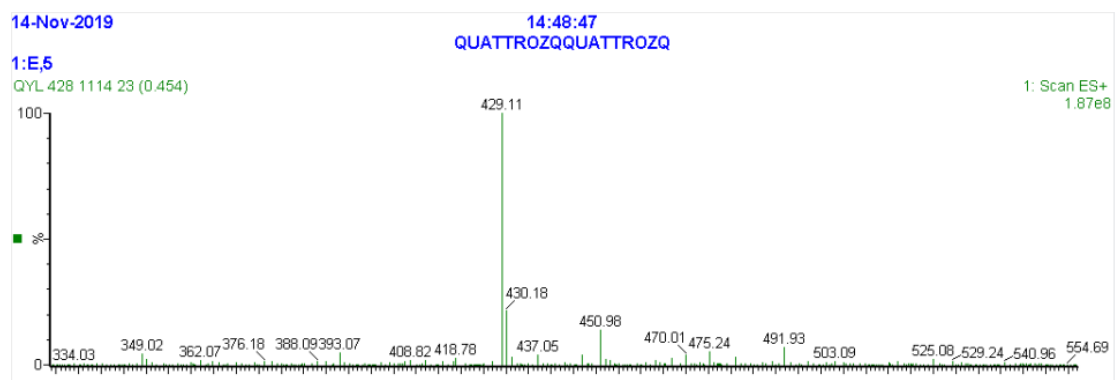

### Compound 14a-3

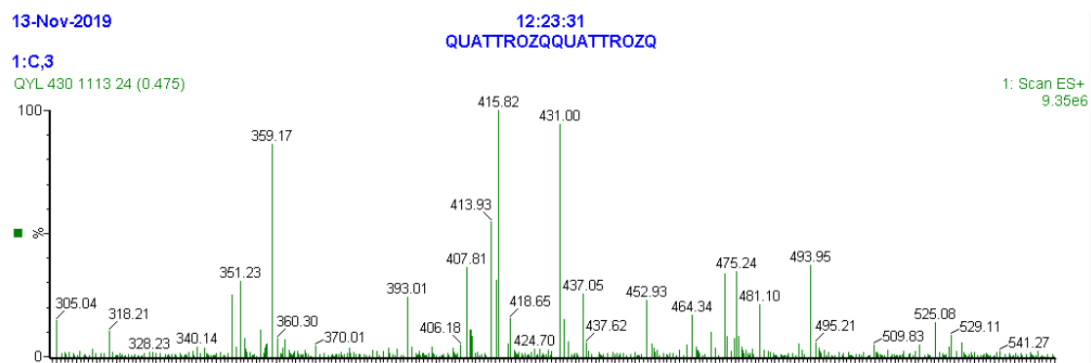

### Compound 14a-4

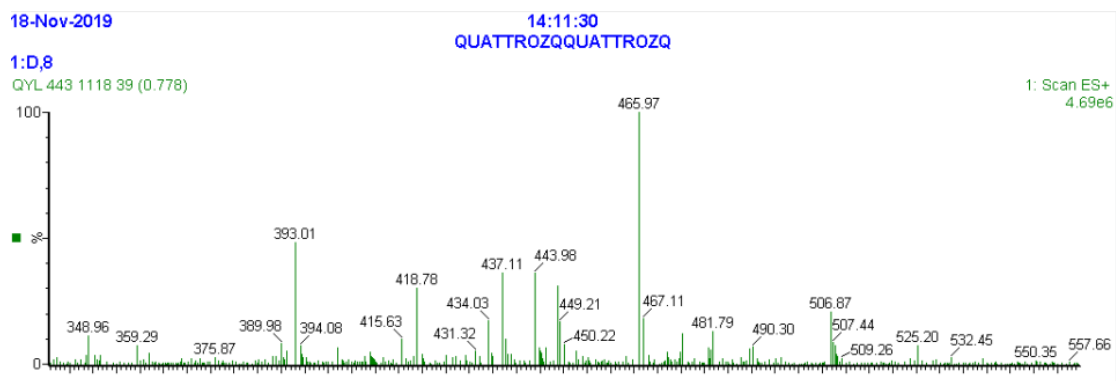

### Compound 14a-5

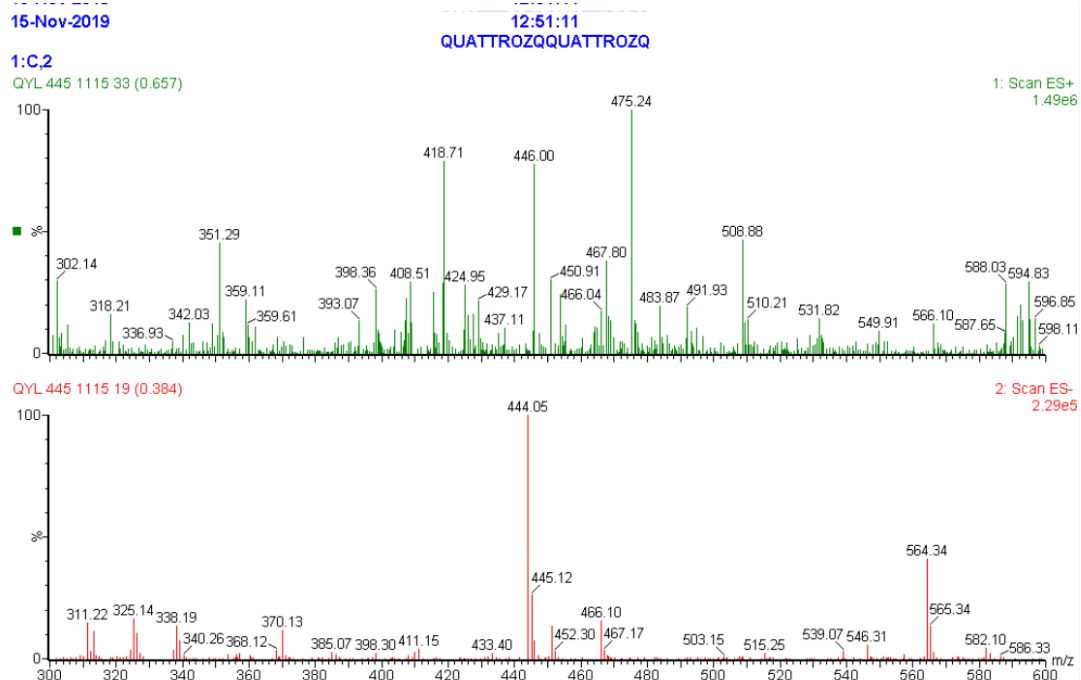

### Compound 14a-6

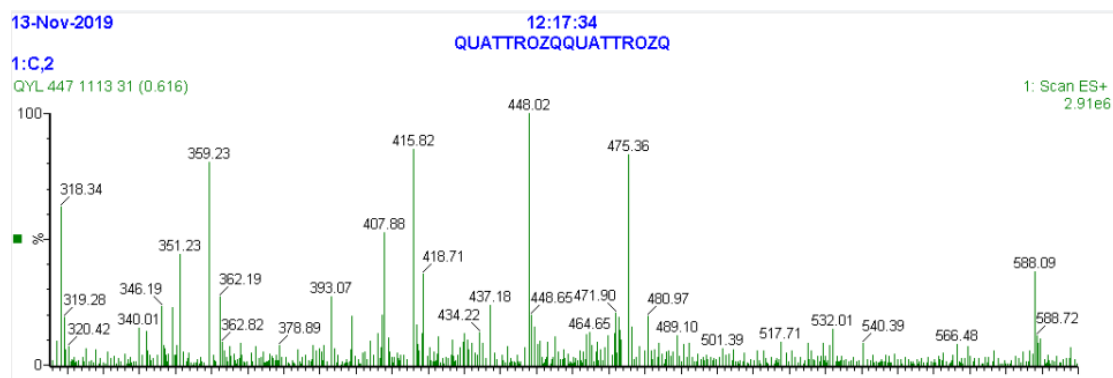

### Compound 14b-1

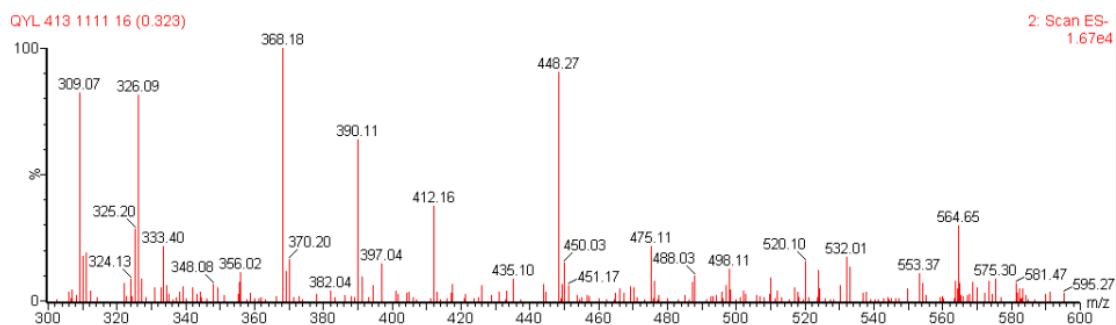

### Compound 14b-2

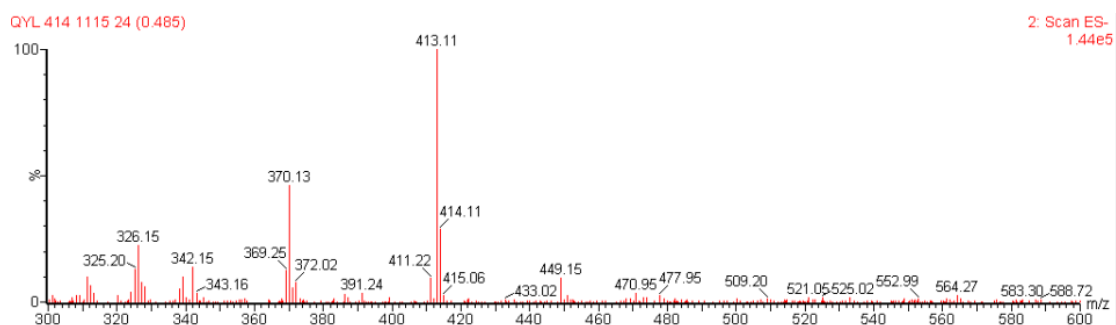

### Compound 14b-3

15-Nov-2019

12:45:14

QUATTROZQQUATTROZQ

1:C,1

QYL 414 1115 20 (0.394)

1: Scan ES+  
2.45e8

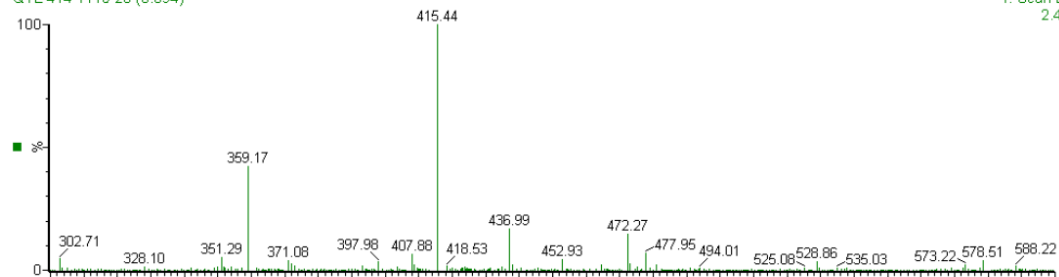

QYL 414 1115 28 (0.566)

2: Scan ES-  
6.10e4

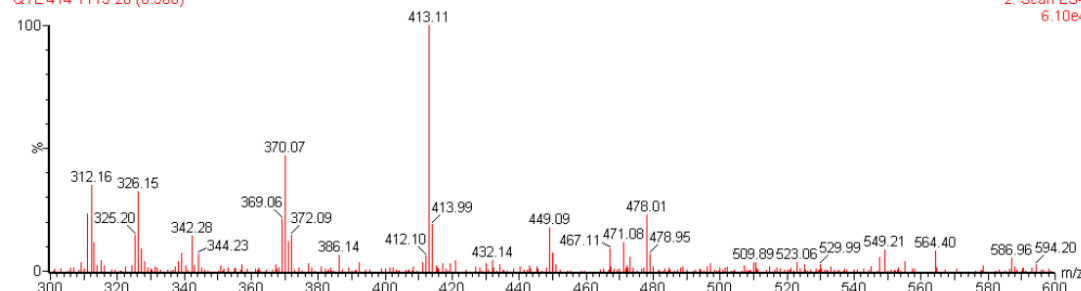

### Compound 14b-4

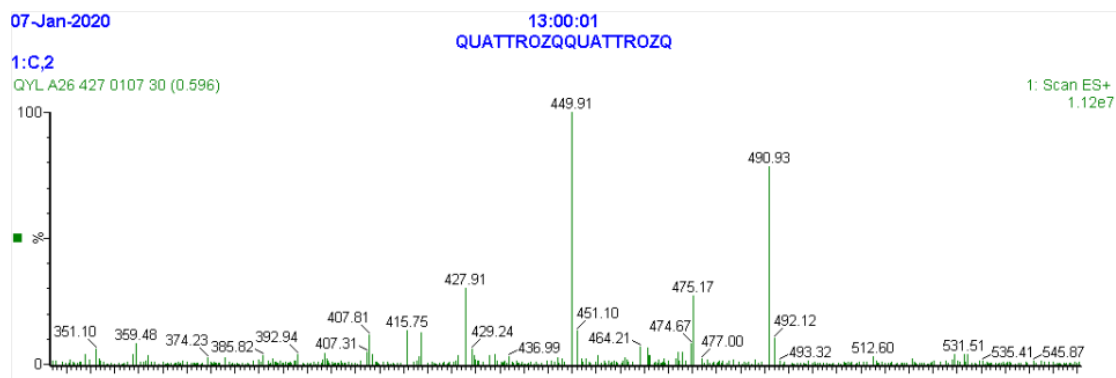

### Compound 14b-5

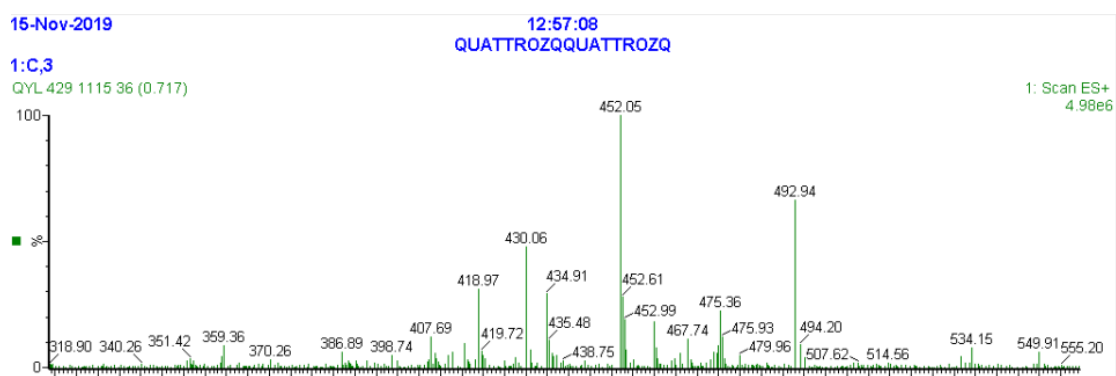

### Compound 14b-6

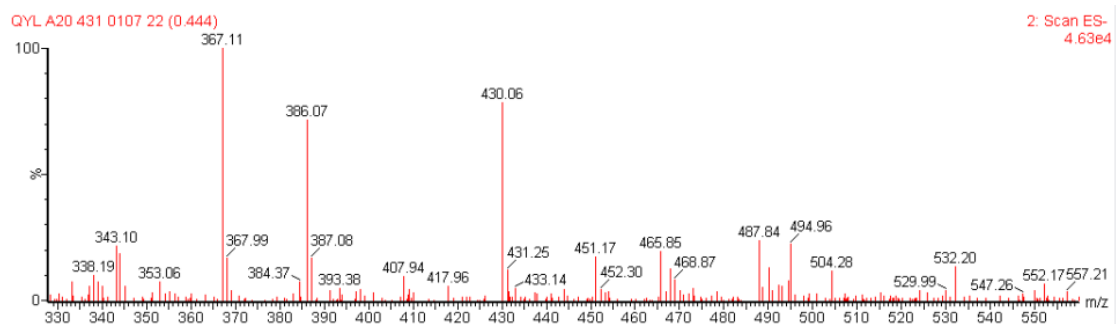

# Compound 13a-1

## Qualitative Analysis Report

Data Filename: 13A1.d Sample Name: 13A1  
Sample Type: Sample Position: P1-D6  
Instrument Name: Instrument 1 User Name:  
Acq Method: ZHENG100-1000.m Acquired Time: 12/18/2021 9:07:13 AM  
IRM Calibration Status: Success DA Method: 20170311.m  
Comment:

Sample Group: Info.  
Acquisition SW: 6200 series TOF/6500 series  
Version: Q-TOF B.05.01 (B5125.2)

### User Spectra

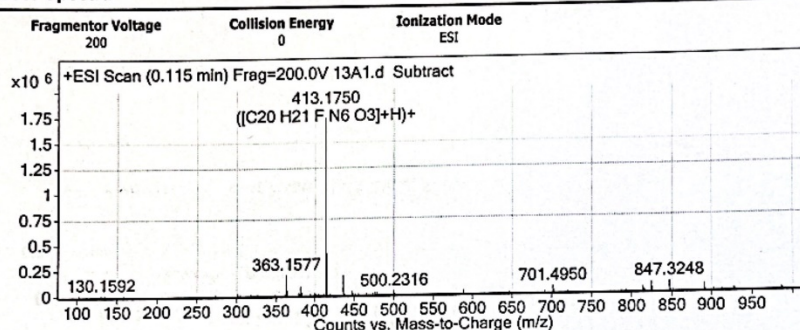

### Peak List

| m/z      | z | Abund      | Formula                                                         | Ion                |
|----------|---|------------|-----------------------------------------------------------------|--------------------|
| 363.1577 | 1 | 198729.25  |                                                                 |                    |
| 381.168  | 1 | 83921.41   |                                                                 |                    |
| 413.175  | 1 | 1737364.88 | C <sub>20</sub> H <sub>21</sub> F N <sub>6</sub> O <sub>3</sub> | (M+H) <sup>+</sup> |
| 414.1783 | 1 | 405704.5   | C <sub>20</sub> H <sub>21</sub> F N <sub>6</sub> O <sub>3</sub> | (M+H) <sup>+</sup> |
| 415.1801 | 1 | 49235.4    | C <sub>20</sub> H <sub>21</sub> F N <sub>6</sub> O <sub>3</sub> | (M+H) <sup>+</sup> |
| 435.1572 | 1 | 189675.69  |                                                                 |                    |
| 701.495  | 1 | 60968.27   |                                                                 |                    |
| 825.3427 | 1 | 79738.38   |                                                                 |                    |
| 847.3248 | 1 | 96803.23   |                                                                 |                    |
| 890.4175 | 1 | 63313.89   |                                                                 |                    |

### Formula Calculator Element Limits

| Element | Min | Max |
|---------|-----|-----|
| C       | 3   | 60  |
| H       | 0   | 120 |
| O       | 0   | 30  |
| N       | 0   | 30  |
| F       | 1   | 1   |

### Formula Calculator Results

| Formula                                                         | Best  | Mass     | Tgt Mass | Diff (ppm) | Ion Species                                                     | Score |
|-----------------------------------------------------------------|-------|----------|----------|------------|-----------------------------------------------------------------|-------|
| C <sub>20</sub> H <sub>21</sub> F N <sub>6</sub> O <sub>3</sub> | FALSE | 412.1678 | 412.1659 | -4.57      | C <sub>20</sub> H <sub>22</sub> F N <sub>6</sub> O <sub>3</sub> | 91.32 |

--- End Of Report ---



# Compound 13a-2

## Qualitative Analysis Report

Data Filename: 13A2.d Sample Name: 13A2  
Sample Type: Sample Position: P1-D7  
Instrument Name: Instrument 1 User Name:  
Acq Method: ZHENG100-1000.m Acquired Time: 12/18/2021 9:10:09 AM  
IRM Calibration Status: Success DA Method: 20170311.m  
Comment:  
Sample Group: Info.  
Acquisition SW: 6200 series TOF/6500 series  
Version: Q-TOF B.05.01 (B5125.2)

### User Spectra

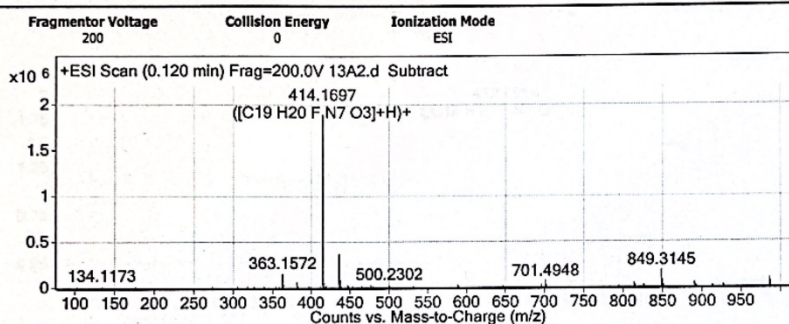

### Peak List

| m/z      | z | Abund      | Formula         | Ion    |
|----------|---|------------|-----------------|--------|
| 363.1572 | 1 | 153184.36  |                 |        |
| 381.1668 | 1 | 58807.92   |                 |        |
| 414.1697 | 1 | 1902151.25 | C19 H20 F N7 O3 | (M+H)+ |
| 415.1728 | 1 | 432729.94  | C19 H20 F N7 O3 | (M+H)+ |
| 436.1521 | 1 | 362744.38  |                 |        |
| 437.1554 | 1 | 75795.52   |                 |        |
| 701.4948 | 1 | 63117.52   |                 |        |
| 849.3145 | 1 | 179315.47  |                 |        |
| 850.316  | 1 | 77845.45   |                 |        |
| 985.7147 | 1 | 87618.44   |                 |        |

### Formula Calculator Element Limits

| Element | Min | Max |
|---------|-----|-----|
| C       | 3   | 60  |
| H       | 0   | 120 |
| O       | 0   | 30  |
| N       | 0   | 30  |
| F       | 1   | 1   |

### Formula Calculator Results

| Formula         | Best | Mass     | Tgt Mass | Diff (ppm) | Ion Species     | Score |
|-----------------|------|----------|----------|------------|-----------------|-------|
| C19 H20 F N7 O3 | TRUE | 413.1625 | 413.1612 | -3.12      | C19 H21 F N7 O3 | 95.59 |

--- End Of Report ---

## Compound 13a-3

## Qualitative Analysis Report

|                        |                             |               |                       |
|------------------------|-----------------------------|---------------|-----------------------|
| Data Filename          | 13A3.d                      | Sample Name   | 13A3                  |
| Sample Type            | Sample                      | Position      | P1-D8                 |
| Instrument Name        | Instrument 1                | User Name     |                       |
| Acq Method             | ZHENG100-1000.m             | Acquired Time | 12/18/2021 9:13:05 AM |
| IRM Calibration Status | Success                     | DA Method     | 20170311.m            |
| Comment                |                             |               |                       |
| Sample Group           | Info.                       |               |                       |
| Acquisition SW         | 6200 series TOF/6500 series |               |                       |
| Version                | Q-TOF B.05.01 (B5125.2)     |               |                       |

## User Spectra

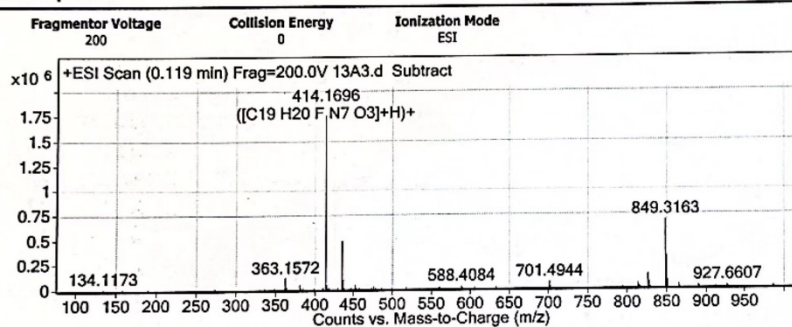

## Peak List

| m/z      | z | Abund      | Formula         | Ion    |
|----------|---|------------|-----------------|--------|
| 363.1572 | 1 | 114615.47  |                 |        |
| 414.1696 | 1 | 1763697.63 | C19 H20 F N7 O3 | (M+H)+ |
| 415.1732 | 1 | 390626.94  | C19 H20 F N7 O3 | (M+H)+ |
| 436.1522 | 1 | 483977.97  |                 |        |
| 437.1559 | 1 | 99911.38   |                 |        |
| 701.4944 | 1 | 64110.41   |                 |        |
| 827.3321 | 1 | 135149.81  |                 |        |
| 849.3163 | 1 | 688056.5   |                 |        |
| 850.3187 | 1 | 318098.16  |                 |        |
| 851.3188 | 1 | 70966.66   |                 |        |

## Formula Calculator Element Limits

| Element | Min | Max |
|---------|-----|-----|
| C       | 3   | 60  |
| H       | 0   | 120 |
| O       | 0   | 30  |
| N       | 0   | 30  |
| F       | 1   | 1   |

## Formula Calculator Results

| Formula         | Best | Mass     | Tgt Mass | Diff (ppm) | Ion Species     | Score |
|-----------------|------|----------|----------|------------|-----------------|-------|
| C19 H20 F N7 O3 | TRUE | 413.1625 | 413.1612 | -3.12      | C19 H21 F N7 O3 | 94.65 |

--- End Of Report ---



# Compound 13a-4

## Qualitative Analysis Report

Data Filename: 13A4.d Sample Name: 13A4  
 Sample Type: Sample Position: P1-D9  
 Instrument Name: Instrument 1 User Name:  
 Acq Method: ZHENG100-1000.m Acquired Time: 12/18/2021 9:16:02 AM  
 IRM Calibration Status: Success DA Method: 20170311.m  
 Comment:

Sample Group: Info.  
 Acquisition SW: 6200 series TOF/6500 series  
 Version: Q-TOF B.05.01 (B5125.2)

### User Spectra

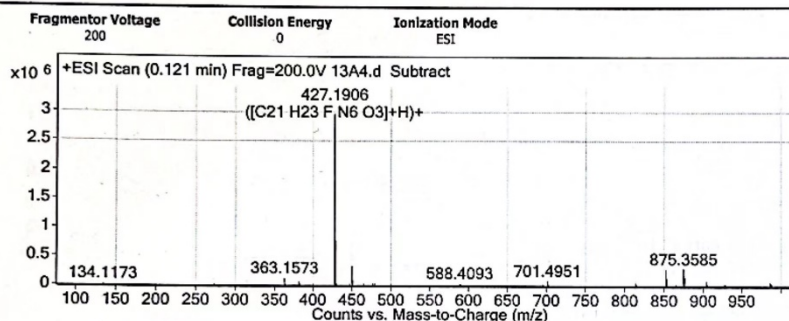

### Peak List

| m/z      | z | Abund      | Formula         | Ion    |
|----------|---|------------|-----------------|--------|
| 363.1573 | 1 | 111885.45  |                 |        |
| 427.1906 | 1 | 2973149.75 | C21 H23 F N6 O3 | (M+H)+ |
| 427.3464 |   | 200681.03  |                 |        |
| 428.1942 | 1 | 757066.56  | C21 H23 F N6 O3 | (M+H)+ |
| 429.1959 | 1 | 97924.82   | C21 H23 F N6 O3 | (M+H)+ |
| 449.173  | 1 | 319175.38  |                 |        |
| 853.3757 | 1 | 268360.16  |                 |        |
| 854.3769 | 1 | 127333.49  |                 |        |
| 875.3585 | 1 | 279387.84  |                 |        |
| 876.36   | 1 | 136366.22  |                 |        |

### Formula Calculator Element Limits

| Element | Min | Max |
|---------|-----|-----|
| C       | 3   | 60  |
| H       | 0   | 120 |
| O       | 0   | 30  |
| N       | 0   | 30  |
| F       | 1   | 1   |

### Formula Calculator Results

| Formula         | Best  | Mass     | Tgt Mass | Diff (ppm) | Ion Species     | Score |
|-----------------|-------|----------|----------|------------|-----------------|-------|
| C21 H23 F N6 O3 | FALSE | 426.1835 | 426.1816 | -4.45      | C21 H24 F N6 O3 | 91.32 |

--- End Of Report ---

# Compound 13a-5

## Qualitative Analysis Report

Data Filename: 13A5.d Sample Name: 13A5  
Sample Type: Sample Position: P1-E1  
Instrument Name: Instrument 1 User Name:  
Acq Method: ZHENG100-1000.m Acquired Time: 12/18/2021 9:18:56 AM  
IRM Calibration Status: Success DA Method: 20170311.m  
Comment:

Sample Group: Info.  
Acquisition SW: 6200 series TOF/6500 series  
Version: Q-TOF B.05.01 (B5125.2)

### User Spectra

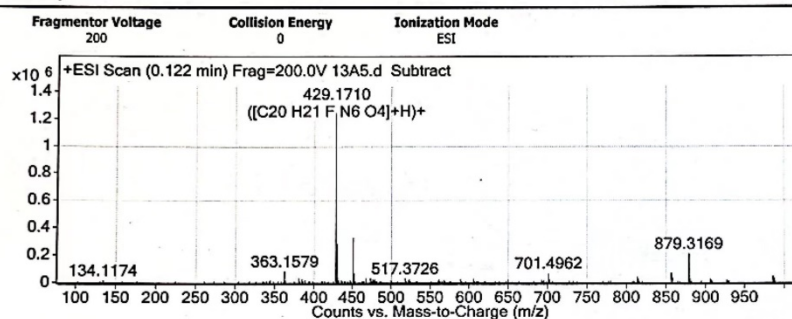

### Peak List

| m/z      | z | Abund      | Formula         | Ion    |
|----------|---|------------|-----------------|--------|
| 363.1579 | 1 | 79253.57   |                 |        |
| 429.171  | 1 | 1243426.88 | C20 H21 F N6 O4 | (M+H)+ |
| 429.3247 | 1 | 97262.33   |                 |        |
| 430.174  | 1 | 282953.06  | C20 H21 F N6 O4 | (M+H)+ |
| 451.153  | 1 | 328334.16  |                 |        |
| 452.1545 | 1 | 68005.76   |                 |        |
| 701.4962 | 1 | 63157.16   |                 |        |
| 857.333  | 1 | 70285.61   |                 |        |
| 879.3169 | 1 | 206611.66  |                 |        |
| 880.3186 | 1 | 94164.09   |                 |        |

### Formula Calculator Element Limits

| Element | Min | Max |
|---------|-----|-----|
| C       | 3   | 60  |
| H       | 0   | 120 |
| O       | 0   | 30  |
| N       | 0   | 30  |
| F       | 1   | 1   |

### Formula Calculator Results

| Formula         | Best  | Mass     | Tgt Mass | Diff (ppm) | Ion Species     | Score |
|-----------------|-------|----------|----------|------------|-----------------|-------|
| C20 H21 F N6 O4 | FALSE | 428.1638 | 428.1608 | -6.85      | C20 H22 F N6 O4 | 82.4  |

--- End Of Report ---

# Compound 13a-6

## Qualitative Analysis Report

|                               |                             |                      |                       |
|-------------------------------|-----------------------------|----------------------|-----------------------|
| <b>Data Filename</b>          | 13A6.d                      | <b>Sample Name</b>   | 13A6                  |
| <b>Sample Type</b>            | Sample                      | <b>Position</b>      | P1-E2                 |
| <b>Instrument Name</b>        | Instrument 1                | <b>User Name</b>     |                       |
| <b>Acq Method</b>             | ZHENG100-1000.m             | <b>Acquired Time</b> | 12/18/2021 9:21:53 AM |
| <b>IRM Calibration Status</b> | Success                     | <b>DA Method</b>     | 20170311.m            |
| <b>Comment</b>                |                             |                      |                       |
| <b>Sample Group</b>           | <b>Info.</b>                |                      |                       |
| <b>Acquisition SW</b>         | 6200 series TOF/6500 series |                      |                       |
| <b>Version</b>                | Q-TOF B.05.01 (B5125.2)     |                      |                       |

### User Spectra

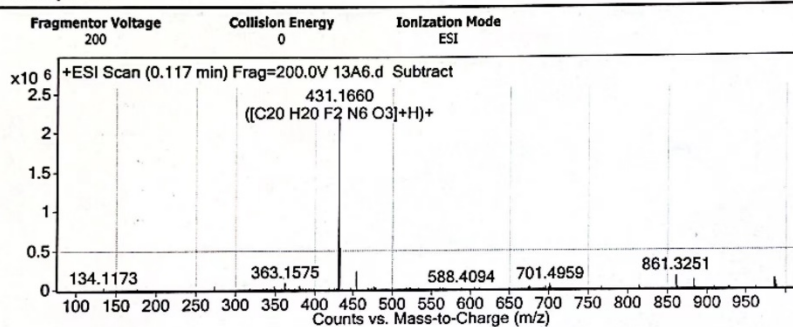

### Peak List

| m/z      | z | Abund      | Formula                                                                      | Ion                |
|----------|---|------------|------------------------------------------------------------------------------|--------------------|
| 363.1575 | 1 | 81944.73   |                                                                              |                    |
| 431.166  | 1 | 2232066.75 | C <sub>20</sub> H <sub>20</sub> F <sub>2</sub> N <sub>6</sub> O <sub>3</sub> | (M+H) <sup>+</sup> |
| 432.1696 | 1 | 536882.81  | C <sub>20</sub> H <sub>20</sub> F <sub>2</sub> N <sub>6</sub> O <sub>3</sub> | (M+H) <sup>+</sup> |
| 433.1756 | 1 | 66417.86   | C <sub>20</sub> H <sub>20</sub> F <sub>2</sub> N <sub>6</sub> O <sub>3</sub> | (M+H) <sup>+</sup> |
| 453.1483 | 1 | 230929.38  |                                                                              |                    |
| 861.3251 | 1 | 163516.08  |                                                                              |                    |
| 862.3271 | 1 | 70253.58   |                                                                              |                    |
| 883.3073 | 1 | 110482.97  |                                                                              |                    |
| 985.7164 | 1 | 117258.66  |                                                                              |                    |
| 986.7189 | 1 | 75622.13   |                                                                              |                    |

### Formula Calculator Element Limits

| Element | Min | Max |
|---------|-----|-----|
| C       | 3   | 60  |
| H       | 0   | 120 |
| O       | 0   | 30  |
| N       | 0   | 30  |
| F       | 2   | 2   |

### Formula Calculator Results

| Formula                                                                      | Best  | Mass    | Tgt Mass | Diff (ppm) | Ion Species                                                                  | Score |
|------------------------------------------------------------------------------|-------|---------|----------|------------|------------------------------------------------------------------------------|-------|
| C <sub>20</sub> H <sub>20</sub> F <sub>2</sub> N <sub>6</sub> O <sub>3</sub> | FALSE | 430.159 | 430.1565 | -5.76      | C <sub>20</sub> H <sub>21</sub> F <sub>2</sub> N <sub>6</sub> O <sub>3</sub> | 85.83 |

--- End Of Report ---



# Compound 13b-1

## Qualitative Analysis Report

|                               |                             |                      |                       |
|-------------------------------|-----------------------------|----------------------|-----------------------|
| <b>Data Filename</b>          | 13B1.d                      | <b>Sample Name</b>   | 13B1                  |
| <b>Sample Type</b>            | Sample                      | <b>Position</b>      | P1-E3                 |
| <b>Instrument Name</b>        | Instrument 1                | <b>User Name</b>     |                       |
| <b>Acq Method</b>             | ZHENG100-1000.m             | <b>Acquired Time</b> | 12/18/2021 9:24:50 AM |
| <b>IRM Calibration Status</b> | Success                     | <b>DA Method</b>     | 20170311.m            |
| <b>Comment</b>                |                             |                      |                       |
| <b>Sample Group</b>           | <b>Info.</b>                |                      |                       |
| <b>Acquisition SW</b>         | 6200 series TOF/6500 series |                      |                       |
| <b>Version</b>                | Q-TOF B.05.01 (B5125.2)     |                      |                       |

### User Spectra

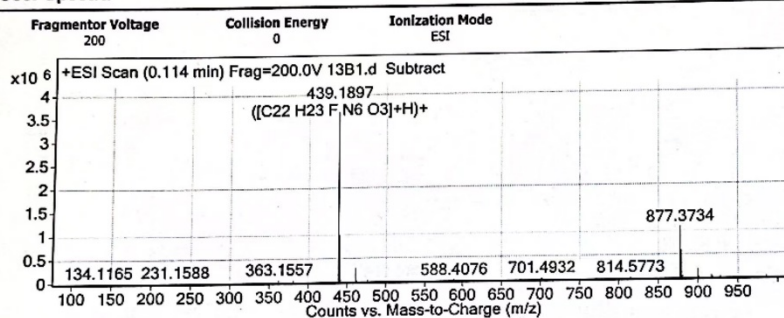

### Peak List

| m/z      | z | Abund      | Formula         | Ion    |
|----------|---|------------|-----------------|--------|
| 439.1897 | 1 | 3637362.75 | C22 H23 F N6 O3 | (M+H)+ |
| 440.1929 | 1 | 997847.75  | C22 H23 F N6 O3 | (M+H)+ |
| 441.1998 | 1 | 222824.33  | C22 H23 F N6 O3 | (M+H)+ |
| 461.1722 | 1 | 284863.44  |                 |        |
| 462.1742 | 1 | 64856.43   |                 |        |
| 877.3734 | 1 | 1085296.88 |                 |        |
| 878.3767 | 1 | 590897.81  |                 |        |
| 879.3806 | 1 | 200894.66  |                 |        |
| 899.3552 | 1 | 171019.92  |                 |        |
| 900.3566 | 1 | 86397.9    |                 |        |

### Formula Calculator Element Limits

| Element | Min | Max |
|---------|-----|-----|
| C       | 3   | 60  |
| H       | 0   | 120 |
| O       | 0   | 30  |
| N       | 0   | 30  |
| F       | 1   | 1   |

### Formula Calculator Results

| Formula         | Best | Mass     | Tgt Mass | Diff (ppm) | Ion Species     | Score |
|-----------------|------|----------|----------|------------|-----------------|-------|
| C22 H23 F N6 O3 | TRUE | 438.1828 | 438.1816 | -2.72      | C22 H24 F N6 O3 | 92.44 |

--- End Of Report ---

## Compound 13b-2

## Qualitative Analysis Report

|                        |                 |               |                       |
|------------------------|-----------------|---------------|-----------------------|
| Data Filename          | 13B2.d          | Sample Name   | 13B2                  |
| Sample Type            | Sample          | Position      | P1-E4                 |
| Instrument Name        | Instrument 1    | User Name     |                       |
| Acq Method             | ZHENG100-1000.m | Acquired Time | 12/18/2021 9:27:46 AM |
| IRM Calibration Status | Success         | DA Method     | 20170311.m            |
| Comment                |                 |               |                       |

|                |                             |
|----------------|-----------------------------|
| Sample Group   | Info.                       |
| Acquisition SW | 6200 series TOF/6500 series |
| Version        | Q-TOF B.05.01 (B5125.2)     |

## User Spectra

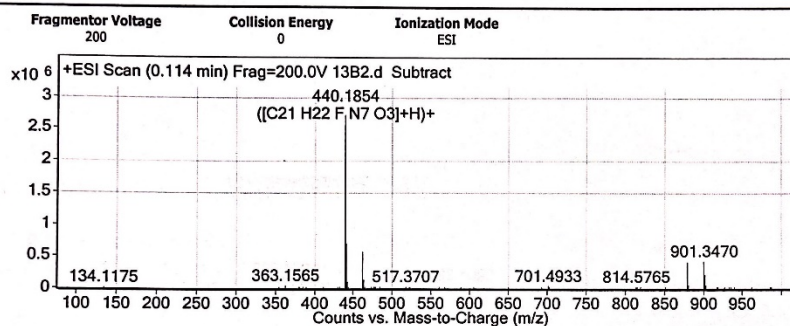

## Peak List

| m/z      | z | Abund      | Formula         | Ion    |
|----------|---|------------|-----------------|--------|
| 440.1854 | 1 | 2718939.75 | C21 H22 F N7 O3 | (M+H)+ |
| 441.1892 | 1 | 700480.69  | C21 H22 F N7 O3 | (M+H)+ |
| 442.1906 | 1 | 90884.5    | C21 H22 F N7 O3 | (M+H)+ |
| 462.1678 | 1 | 562085.31  |                 |        |
| 463.1698 | 1 | 128785.03  |                 |        |
| 879.3648 | 1 | 410518.78  |                 |        |
| 880.3671 | 1 | 202576.11  |                 |        |
| 901.347  | 1 | 424521.16  |                 |        |
| 902.3493 | 1 | 206448.8   |                 |        |
| 903.3498 | 1 | 50881.78   |                 |        |

## Formula Calculator Element Limits

| Element | Min | Max |
|---------|-----|-----|
| C       | 3   | 60  |
| H       | 0   | 120 |
| O       | 0   | 30  |
| N       | 0   | 30  |
| F       | 1   | 1   |

## Formula Calculator Results

| Formula         | Best  | Mass     | Tgt Mass | Diff (ppm) | Ion Species     | Score |
|-----------------|-------|----------|----------|------------|-----------------|-------|
| C21 H22 F N7 O3 | FALSE | 439.1784 | 439.1768 | -3.51      | C21 H23 F N7 O3 | 93.66 |

--- End Of Report ---

## Compound 13b-3

## Qualitative Analysis Report

|                        |                             |               |                       |
|------------------------|-----------------------------|---------------|-----------------------|
| Data Filename          | 13B3.d                      | Sample Name   | 13B3                  |
| Sample Type            | Sample                      | Position      | P1-E5                 |
| Instrument Name        | Instrument 1                | User Name     |                       |
| Acq Method             | ZHENG100-1000.m             | Acquired Time | 12/18/2021 9:30:43 AM |
| IRM Calibration Status | Success                     | DA Method     | 20170311.m            |
| Comment                |                             |               |                       |
| Sample Group           | Info.                       |               |                       |
| Acquisition SW         | 6200 series TOF/6500 series |               |                       |
| Version                | Q-TOF B.05.01 (B5125.2)     |               |                       |

## User Spectra

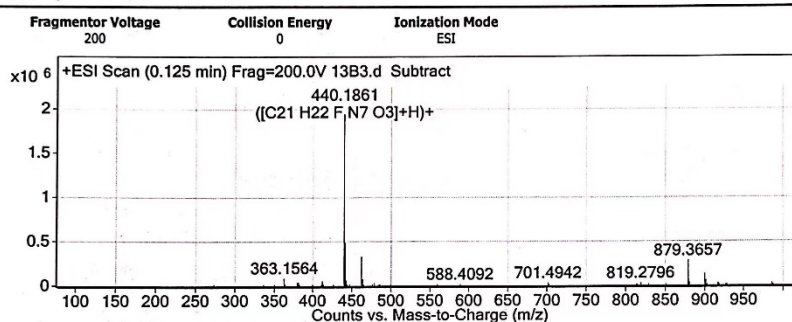

## Peak List

| m/z      | z | Abund      | Formula         | Ion    |
|----------|---|------------|-----------------|--------|
| 363.1564 | 1 | 82760.33   |                 |        |
| 440.1861 | 1 | 1943522.88 | C21 H22 F N7 O3 | (M+H)+ |
| 441.1893 | 1 | 486017.22  | C21 H22 F N7 O3 | (M+H)+ |
| 442.1903 | 1 | 63089.89   | C21 H22 F N7 O3 | (M+H)+ |
| 462.1681 | 1 | 320570.69  |                 |        |
| 463.1701 | 1 | 74666.16   |                 |        |
| 879.3657 | 1 | 277727.31  |                 |        |
| 880.3679 | 1 | 136823.73  |                 |        |
| 901.347  | 1 | 130375.75  |                 |        |
| 902.3488 | 1 | 62166.71   |                 |        |

## Formula Calculator Element Limits

| Element | Min | Max |
|---------|-----|-----|
| C       | 3   | 60  |
| H       | 0   | 120 |
| O       | 0   | 30  |
| N       | 0   | 30  |
| F       | 1   | 1   |

## Formula Calculator Results

| Formula         | Best  | Mass     | Tgt Mass | Diff (ppm) | Ion Species     | Score |
|-----------------|-------|----------|----------|------------|-----------------|-------|
| C21 H22 F N7 O3 | FALSE | 439.1789 | 439.1768 | -4.81      | C21 H23 F N7 O3 | 90.08 |

--- End Of Report ---



# Compound 13b-4

## Qualitative Analysis Report

|                        |                             |               |                       |
|------------------------|-----------------------------|---------------|-----------------------|
| Data Filename          | 13B4.d                      | Sample Name   | 13B4                  |
| Sample Type            | Sample                      | Position      | P1-E6                 |
| Instrument Name        | Instrument 1                | User Name     |                       |
| Acq Method             | ZHENG100-1000.m             | Acquired Time | 12/18/2021 9:33:39 AM |
| IRM Calibration Status | Success                     | DA Method     | 20170311.m            |
| Comment                |                             |               |                       |
| Sample Group           | Info.                       |               |                       |
| Acquisition SW         | 6200 series TOF/6500 series |               |                       |
| Version                | Q-TOF B.05.01 (B5125.2)     |               |                       |

### User Spectra

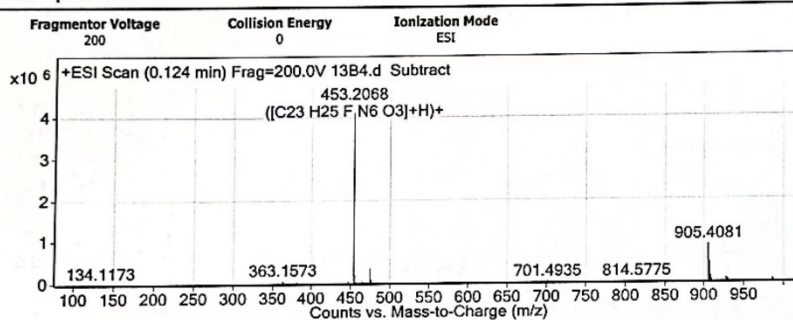

### Peak List

| m/z      | z | Abund     | Formula         | Ion    |
|----------|---|-----------|-----------------|--------|
| 363.1573 | 1 | 59242.88  |                 |        |
| 453.2068 | 1 | 4113850.5 | C23 H25 F N6 O3 | (M+H)+ |
| 454.2098 | 1 | 1158621.5 | C23 H25 F N6 O3 | (M+H)+ |
| 455.2126 | 1 | 171343.09 | C23 H25 F N6 O3 | (M+H)+ |
| 475.1892 | 1 | 338735.31 |                 |        |
| 476.1912 | 1 | 78905.31  |                 |        |
| 905.4081 | 1 | 886842.19 |                 |        |
| 906.4108 | 1 | 473592.84 |                 |        |
| 907.4119 | 1 | 128916.54 |                 |        |
| 927.388  | 1 | 77905.8   |                 |        |

### Formula Calculator Element Limits

| Element | Min | Max |
|---------|-----|-----|
| C       | 3   | 60  |
| H       | 0   | 120 |
| O       | 0   | 30  |
| N       | 0   | 30  |
| F       | 1   | 1   |

### Formula Calculator Results

| Formula         | Best  | Mass     | Tgt Mass | Diff (ppm) | Ion Species     | Score |
|-----------------|-------|----------|----------|------------|-----------------|-------|
| C23 H25 F N6 O3 | FALSE | 452.1996 | 452.1972 | -5.17      | C23 H26 F N6 O3 | 88.78 |

--- End Of Report ---

## Compound 13b-5

## Qualitative Analysis Report

|                        |                 |               |                       |
|------------------------|-----------------|---------------|-----------------------|
| Data Filename          | 1385.d          | Sample Name   | 1385                  |
| Sample Type            | Sample          | Position      | P1-E7                 |
| Instrument Name        | Instrument 1    | User Name     |                       |
| Acq Method             | ZHENG100-1000.m | Acquired Time | 12/18/2021 9:36:36 AM |
| IRM Calibration Status | Success         | DA Method     | 20170311.m            |
| Comment                |                 |               |                       |

|                |                             |
|----------------|-----------------------------|
| Sample Group   | Info.                       |
| Acquisition SW | 6200 series TOF/6500 series |
| Version        | Q-TOF B.05.01 (B5125.2)     |

## User Spectra

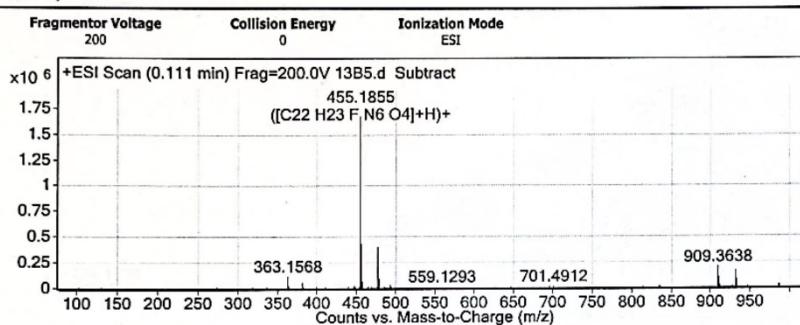

## Peak List

| m/z      | z | Abund      | Formula                                                         | Ion                |
|----------|---|------------|-----------------------------------------------------------------|--------------------|
| 363.1568 | 1 | 110080.06  |                                                                 |                    |
| 455.1855 | 1 | 1679279.75 | C <sub>22</sub> H <sub>23</sub> F N <sub>6</sub> O <sub>4</sub> | (M+H) <sup>+</sup> |
| 456.1885 | 1 | 435122.19  | C <sub>22</sub> H <sub>23</sub> F N <sub>6</sub> O <sub>4</sub> | (M+H) <sup>+</sup> |
| 457.1891 | 1 | 61238.46   | C <sub>22</sub> H <sub>23</sub> F N <sub>6</sub> O <sub>4</sub> | (M+H) <sup>+</sup> |
| 477.1675 | 1 | 400454.44  |                                                                 |                    |
| 478.1694 | 1 | 95284.05   |                                                                 |                    |
| 909.3638 | 1 | 196912.97  |                                                                 |                    |
| 910.3665 | 1 | 97425.66   |                                                                 |                    |
| 931.3461 | 1 | 156739.23  |                                                                 |                    |
| 932.3514 | 1 | 80171.13   |                                                                 |                    |

## Formula Calculator Element Limits

| Element | Min | Max |
|---------|-----|-----|
| C       | 3   | 60  |
| H       | 0   | 120 |
| O       | 0   | 30  |
| N       | 0   | 30  |
| F       | 1   | 1   |

## Formula Calculator Results

| Formula                                                         | Best  | Mass     | Tgt Mass | Diff (ppm) | Ion Species                                                     | Score |
|-----------------------------------------------------------------|-------|----------|----------|------------|-----------------------------------------------------------------|-------|
| C <sub>22</sub> H <sub>23</sub> F N <sub>6</sub> O <sub>4</sub> | FALSE | 454.1782 | 454.1765 | -3.68      | C <sub>22</sub> H <sub>24</sub> F N <sub>6</sub> O <sub>4</sub> | 93.68 |

--- End Of Report ---



## Compound 13b-6

## Qualitative Analysis Report

|                        |                 |               |                       |
|------------------------|-----------------|---------------|-----------------------|
| Data Filename          | 13B6.d          | Sample Name   | 13B6                  |
| Sample Type            | Sample          | Position      | P1-E8                 |
| Instrument Name        | Instrument 1    | User Name     |                       |
| Acq Method             | ZHENG100-1000.m | Acquired Time | 12/18/2021 9:39:33 AM |
| IRM Calibration Status | Success         | DA Method     | 20170311.m            |
| Comment                |                 |               |                       |

|                |                             |
|----------------|-----------------------------|
| Sample Group   | Info.                       |
| Acquisition SW | 6200 series TOF/6500 series |
| Version        | Q-TOF B.05.01 (B5125.2)     |

## User Spectra

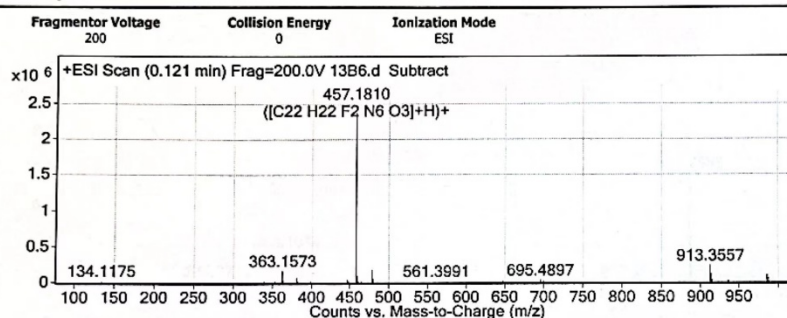

## Peak List

| m/z      | z | Abund     | Formula          | Ion    |
|----------|---|-----------|------------------|--------|
| 363.1573 | 1 | 152427.61 |                  |        |
| 381.1677 | 1 | 63828.09  |                  |        |
| 457.181  | 1 | 2374091.5 | C22 H22 F2 N6 O3 | (M+H)+ |
| 458.1847 | 1 | 623355.88 | C22 H22 F2 N6 O3 | (M+H)+ |
| 459.1867 | 1 | 82105.44  | C22 H22 F2 N6 O3 | (M+H)+ |
| 479.1637 | 1 | 170425.77 |                  |        |
| 913.3557 | 1 | 222924.61 |                  |        |
| 914.3575 | 1 | 110910.73 |                  |        |
| 985.715  | 1 | 99292.59  |                  |        |
| 986.717  | 1 | 62713.73  |                  |        |

## Formula Calculator Element Limits

| Element | Min | Max |
|---------|-----|-----|
| C       | 3   | 60  |
| H       | 0   | 120 |
| O       | 0   | 30  |
| N       | 0   | 30  |
| F       | 2   | 2   |

## Formula Calculator Results

| Formula          | Best  | Mass     | Tgt Mass | Diff (ppm) | Ion Species      | Score |
|------------------|-------|----------|----------|------------|------------------|-------|
| C22 H22 F2 N6 O3 | FALSE | 456.1739 | 456.1721 | -3.89      | C22 H23 F2 N6 O3 | 92.65 |

--- End Of Report ---

# Compound 14a-1

## Qualitative Analysis Report

|                        |                             |               |                       |
|------------------------|-----------------------------|---------------|-----------------------|
| Data Filename          | 14A1.d                      | Sample Name   | 14A1                  |
| Sample Type            | Sample                      | Position      | P1-A3                 |
| Instrument Name        | Instrument 1                | User Name     |                       |
| Acq Method             | ZHENG100-1000.m             | Acquired Time | 12/17/2021 7:33:21 PM |
| IRM Calibration Status | Success                     | DA Method     | 20170311.m            |
| Comment                |                             |               |                       |
| Sample Group           | Info.                       |               |                       |
| Acquisition SW         | 6200 series TOF/6500 series |               |                       |
| Version                | Q-TOF B.05.01 (B5125.2)     |               |                       |

### User Spectra

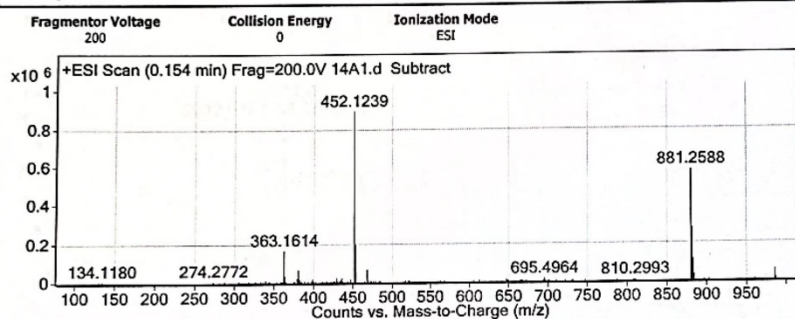

### Peak List

| m/z      | z | Abund     |
|----------|---|-----------|
| 363.1614 | 1 | 166778.67 |
| 381.171  | 1 | 62431.75  |
| 452.1239 | 1 | 896078.38 |
| 453.1267 | 1 | 198570.2  |
| 454.1231 | 1 | 54907.35  |
| 468.0965 | 1 | 65137.32  |
| 881.2588 | 1 | 579139.56 |
| 882.261  | 1 | 274355.19 |
| 883.2587 | 1 | 111827.21 |
| 985.725  | 1 | 52005.89  |

### Formula Calculator Element Limits

| Element | Min | Max |
|---------|-----|-----|
| C       | 3   | 60  |
| H       | 0   | 120 |
| O       | 0   | 30  |
| N       | 0   | 30  |
| F       | 1   | 1   |
| S       | 1   | 1   |

--- End Of Report ---

# Compound 14a-2

## Qualitative Analysis Report

|                        |                 |               |                       |
|------------------------|-----------------|---------------|-----------------------|
| Data Filename          | 14A2.d          | Sample Name   | 14A2                  |
| Sample Type            | Sample          | Position      | P1-F1                 |
| Instrument Name        | Instrument 1    | User Name     |                       |
| Acq Method             | ZHENG100-1000.m | Acquired Time | 12/18/2021 9:42:29 AM |
| IRM Calibration Status | Success         | DA Method     | 20170311.m            |
| Comment                |                 |               |                       |

|                |                             |
|----------------|-----------------------------|
| Sample Group   | Info.                       |
| Acquisition SW | 6200 series TOF/6500 series |
| Version        | Q-TOF B.05.01 (B5125.2)     |

### User Spectra

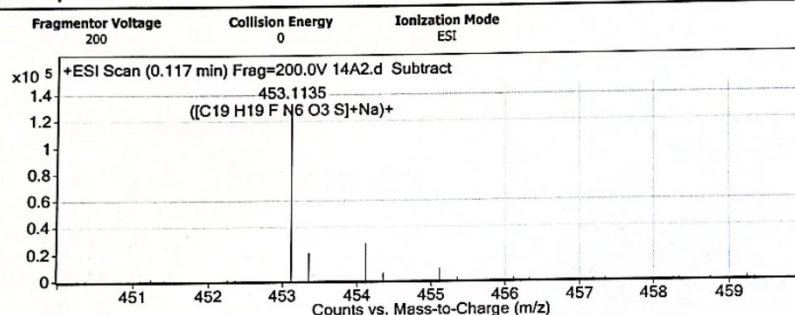

### Peak List

| m/z      | z | Abund      |
|----------|---|------------|
| 274.2752 | 1 | 880201.25  |
| 318.3019 | 1 | 631956.88  |
| 475.3283 | 2 | 789562.69  |
| 588.4122 | 1 | 1445558.13 |
| 589.4162 | 1 | 501825     |
| 701.497  | 1 | 2697659.25 |
| 702.5001 | 1 | 1181877.88 |
| 703.5032 | 1 | 273883     |
| 814.5823 | 1 | 1371627.75 |
| 815.5858 | 1 | 680633.13  |

### Formula Calculator Element Limits

| Element | Min | Max |
|---------|-----|-----|
| C       | 3   | 60  |
| H       | 0   | 120 |
| O       | 0   | 30  |
| N       | 0   | 30  |
| F       | 1   | 1   |
| S       | 1   | 1   |

### Formula Calculator Results

| Formula           | Best | Mass    | Tgt Mass | Diff (ppm) | Ion Species          | Score |
|-------------------|------|---------|----------|------------|----------------------|-------|
| C19 H19 F N6 O3 S | TRUE | 430.124 | 430.1223 | -3.9       | C19 H19 F N6 Na O3 S | 90.35 |

--- End Of Report ---



# Compound 14a-3

## Qualitative Analysis Report

|                        |                 |               |                       |
|------------------------|-----------------|---------------|-----------------------|
| Data Filename          | 14A3.d          | Sample Name   | 14A3                  |
| Sample Type            | Sample          | Position      | P1-F2                 |
| Instrument Name        | Instrument 1    | User Name     |                       |
| Acq Method             | ZHENG100-1000.m | Acquired Time | 12/18/2021 9:45:24 AM |
| IRM Calibration Status | Success         | DA Method     | 20170311.m            |
| Comment                |                 |               |                       |

|                |                             |
|----------------|-----------------------------|
| Sample Group   | Info.                       |
| Acquisition SW | 6200 series TOF/6500 series |
| Version        | Q-TOF B.05.01 (B5125.2)     |

### User Spectra

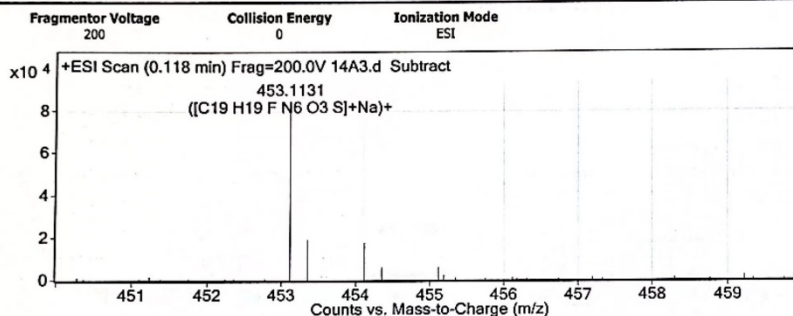

### Peak List

| m/z      | z | Abund      |
|----------|---|------------|
| 274.2752 | 1 | 805906.75  |
| 318.3016 | 1 | 603440.56  |
| 475.3277 | 2 | 829456.31  |
| 588.4116 | 1 | 1487310.38 |
| 589.4152 | 1 | 515069.84  |
| 701.4963 | 1 | 2830297.75 |
| 702.4995 | 1 | 1229214.75 |
| 703.5029 | 1 | 287015.81  |
| 814.5816 | 1 | 1509447.38 |
| 815.5855 | 1 | 748071.38  |

### Formula Calculator Element Limits

| Element | Min | Max |
|---------|-----|-----|
| C       | 3   | 60  |
| H       | 0   | 120 |
| O       | 0   | 30  |
| N       | 0   | 30  |
| F       | 1   | 1   |
| S       | 1   | 1   |

### Formula Calculator Results

| Formula           | Best | Mass     | Tgt Mass | Diff (ppm) | Ion Species       | Score |
|-------------------|------|----------|----------|------------|-------------------|-------|
| C19 H19 F N6 O3 S | TRUE | 430.1238 | 430.1223 | -3.38      | C19 H19 F N6 O3 S | 92.93 |

--- End Of Report ---

# Compound 14a-4

## Qualitative Analysis Report

Data Filename: 14A4.d Sample Name: 14A4  
Sample Type: Sample Position: P1-F3  
Instrument Name: Instrument 1 User Name:  
Acq Method: ZHENG100-1000.m Acquired Time: 12/18/2021 9:48:21 AM  
IRM Calibration Status: Success DA Method: 20170311.m  
Comment:

Sample Group: Info.

Acquisition SW: 6200 series TOF/6500 series  
Version: Q-TOF B.05.01 (B5125.2)

### User Spectra

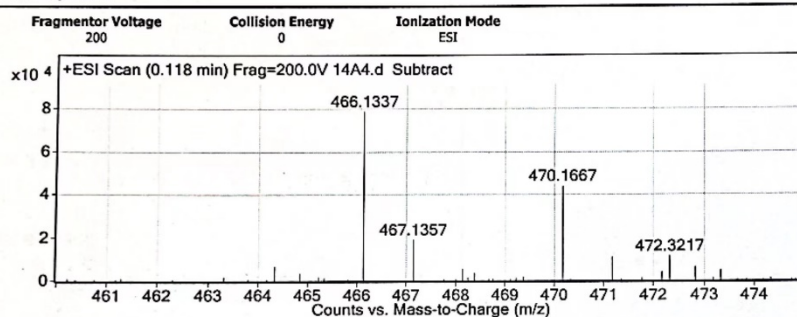

### Peak List

| m/z      | z | Abund      |
|----------|---|------------|
| 274.2753 | 1 | 1013364.5  |
| 318.302  | 1 | 709357.56  |
| 475.3283 | 2 | 914926.75  |
| 588.4124 | 1 | 1628655    |
| 589.4164 | 1 | 572134.81  |
| 701.4973 | 1 | 2998258.25 |
| 702.5004 | 1 | 1313458.38 |
| 703.5039 | 1 | 306086.88  |
| 814.5825 | 1 | 1540120.63 |
| 815.5864 | 1 | 772077.19  |

### Formula Calculator Element Limits

| Element | Min | Max |
|---------|-----|-----|
| C       | 3   | 60  |
| H       | 0   | 120 |
| O       | 0   | 30  |
| N       | 0   | 30  |
| F       | 1   | 1   |
| S       | 1   | 1   |

--- End Of Report ---

# Compound 14a-5

## Qualitative Analysis Report

Data Filename: 14A5.d Sample Name: 14A5  
 Sample Type: Sample Position: P1-F4  
 Instrument Name: Instrument 1 User Name:  
 Acq Method: ZHENG100-1000.m Acquired Time: 12/18/2021 9:51:18 AM  
 IRM Calibration Status: Success DA Method: 20170311.m  
 Comment:

Sample Group: Info.  
 Acquisition SW: 6200 series TOF/6500 series  
 Version: Q-TOF B.05.01 (B5125.2)

### User Spectra

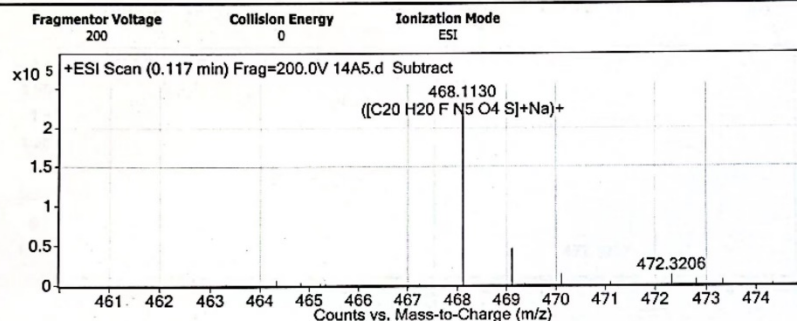

### Peak List

| m/z      | z | Abund      |
|----------|---|------------|
| 274.2752 | 1 | 999895.94  |
| 318.3017 | 1 | 665345.69  |
| 340.2834 | 1 | 304752.38  |
| 475.3278 | 2 | 741801.88  |
| 588.412  | 1 | 1374273.25 |
| 589.4157 | 1 | 472936.34  |
| 701.4965 | 1 | 2644920.75 |
| 702.4997 | 1 | 1144999.75 |
| 814.5817 | 1 | 1319037.13 |
| 815.5854 | 1 | 651833.63  |

### Formula Calculator Element Limits

| Element | Min | Max |
|---------|-----|-----|
| C       | 3   | 60  |
| H       | 0   | 120 |
| O       | 0   | 30  |
| N       | 0   | 30  |
| F       | 1   | 1   |
| S       | 1   | 1   |

### Formula Calculator Results

| Formula           | Best  | Mass     | Tgt Mass | Diff (ppm) | Ion Species          | Score |
|-------------------|-------|----------|----------|------------|----------------------|-------|
| C20 H20 F N5 O4 S | FALSE | 445.1236 | 445.122  | -3.48      | C20 H20 F N5 Na O4 S | 91.15 |

--- End Of Report ---

# Compound 14a-6

## Qualitative Analysis Report

Data Filename: 14A6.d Sample Name: 14A6  
 Sample Type: Sample Position: P1-F5  
 Instrument Name: Instrument 1 User Name:  
 Acq Method: ZHENG100-1000.m Acquired Time: 12/18/2021 9:54:15 AM  
 IRM Calibration Status: Success DA Method: 20170311.m  
 Comment:

Sample Group: Info.  
 Acquisition SW: 6200 series TOF/6500 series  
 Version: Q-TOF B.05.01 (B5125.2)

### User Spectra

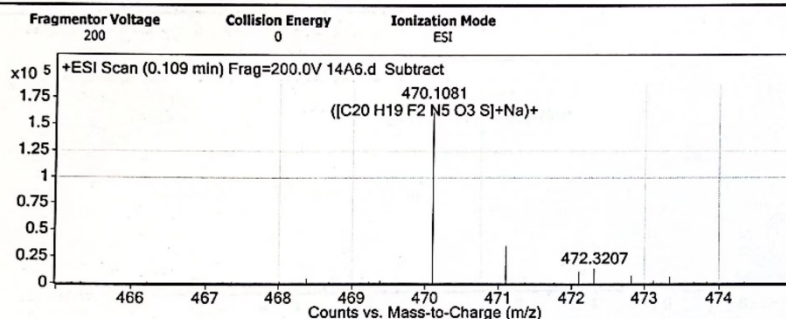

### Peak List

| m/z      | z | Abund      |
|----------|---|------------|
| 274.2749 | 1 | 952946.69  |
| 318.3015 | 1 | 640031.5   |
| 475.3276 | 2 | 881883.25  |
| 588.4115 | 1 | 1572009.13 |
| 589.4151 | 1 | 549769.88  |
| 701.4961 | 1 | 3168274.75 |
| 702.4995 | 1 | 1379356.88 |
| 814.5813 | 1 | 1688069    |
| 815.5851 | 1 | 856933.81  |
| 927.6666 | 1 | 346751.56  |

### Formula Calculator Element Limits

| Element | Min | Max |
|---------|-----|-----|
| C       | 3   | 60  |
| H       | 0   | 120 |
| O       | 0   | 30  |
| N       | 0   | 30  |
| F       | 2   | 2   |
| S       | 1   | 1   |

### Formula Calculator Results

| Formula            | Best | Mass     | Tgt Mass | Diff (ppm) | Ion Species           | Score |
|--------------------|------|----------|----------|------------|-----------------------|-------|
| C20 H19 F2 N5 O3 S | TRUE | 447.1187 | 447.1177 | -2.42      | C20 H19 F2 N5 Na O3 S | 95.05 |

--- End Of Report ---



# Compound 14b-1

## Qualitative Analysis Report

|                        |                             |               |                       |
|------------------------|-----------------------------|---------------|-----------------------|
| Data Filename          | 14B1.d                      | Sample Name   | 14B1                  |
| Sample Type            | Sample                      | Position      | P1-F6                 |
| Instrument Name        | Instrument 1                | User Name     |                       |
| Acq Method             | ZHENG100-1000.m             | Acquired Time | 12/18/2021 9:57:11 AM |
| IRM Calibration Status | Success                     | DA Method     | 20170311.m            |
| Comment                |                             |               |                       |
| Sample Group           | Info.                       |               |                       |
| Acquisition SW         | 6200 series TOF/6500 series |               |                       |
| Version                | Q-TOF B.05.01 (B5125.2)     |               |                       |

### User Spectra

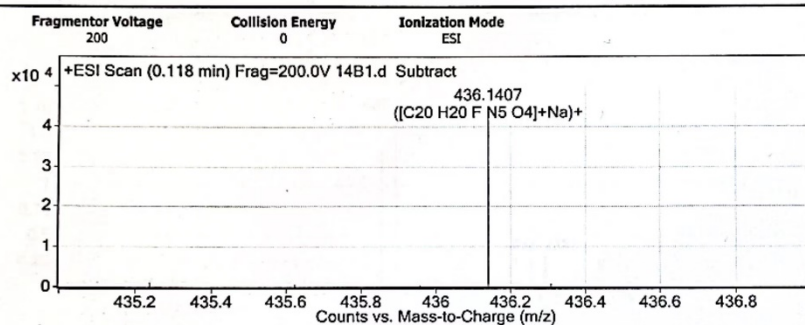

### Peak List

| m/z      | z | Abund      |
|----------|---|------------|
| 274.2756 | 1 | 940386.5   |
| 318.3025 | 1 | 640912.25  |
| 475.3288 | 2 | 921775.19  |
| 588.413  | 1 | 1616366.13 |
| 589.4169 | 1 | 565004.56  |
| 701.498  | 1 | 3043929.75 |
| 702.5012 | 1 | 1326821.75 |
| 814.5834 | 1 | 1599978.88 |
| 815.5873 | 1 | 799718.94  |
| 927.6688 | 1 | 314654.5   |

### Formula Calculator Element Limits

| Element | Min | Max |
|---------|-----|-----|
| C       | 3   | 60  |
| H       | 0   | 120 |
| O       | 0   | 30  |
| N       | 0   | 30  |
| F       | 1   | 1   |
| S       | 0   | 0   |

### Formula Calculator Results

| Formula         | Best  | Mass     | Tgt Mass | Diff (ppm) | Ion Species        | Score |
|-----------------|-------|----------|----------|------------|--------------------|-------|
| C20 H20 F N5 O4 | FALSE | 413.1515 | 413.1499 | -3.68      | C20 H20 F N5 Na O4 | 42.35 |

--- End Of Report ---



# Compound 14b-2

## Qualitative Analysis Report

|                        |                 |               |                        |
|------------------------|-----------------|---------------|------------------------|
| Data Filename          | 14B2.d          | Sample Name   | 14B2                   |
| Sample Type            | Sample          | Position      | P1-F7                  |
| Instrument Name        | Instrument 1    | User Name     |                        |
| Acq Method             | ZHENG100-1000.m | Acquired Time | 12/18/2021 10:00:08 AM |
| IRM Calibration Status | Success         | DA Method     | 20170311.m             |
| Comment                |                 |               |                        |

|                |                             |       |
|----------------|-----------------------------|-------|
| Sample Group   |                             | Info. |
| Acquisition SW | 6200 series TOF/6500 series |       |
| Version        | Q-TOF B.05.01 (B5125.2)     |       |

### User Spectra

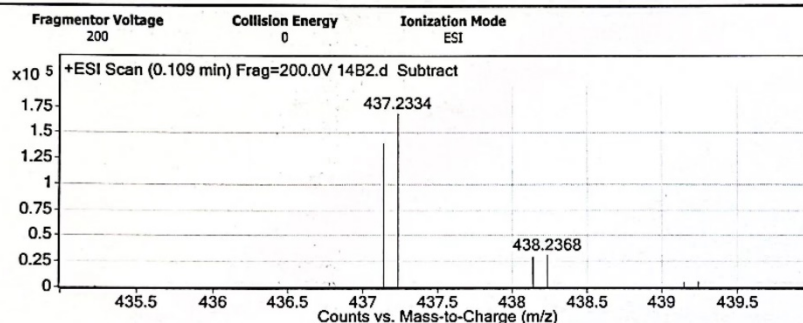

### Peak List

| m/z      | z | Abund      |
|----------|---|------------|
| 274.2756 | 1 | 842026.44  |
| 318.3019 | 1 | 572126.56  |
| 475.3283 | 2 | 981313.25  |
| 588.4123 | 1 | 1740758.38 |
| 589.4162 | 1 | 615434.06  |
| 701.497  | 1 | 3221402.75 |
| 702.5004 | 1 | 1397455    |
| 814.5823 | 1 | 1725972.75 |
| 815.5859 | 1 | 882205.88  |
| 927.6679 | 1 | 362921.09  |

### Formula Calculator Element Limits

| Element | Min | Max |
|---------|-----|-----|
| C       | 3   | 60  |
| H       | 0   | 120 |
| O       | 0   | 30  |
| N       | 0   | 30  |
| F       | 1   | 1   |
| S       | 0   | 0   |

### Formula Calculator Results

| Formula         | Best  | Mass     | Tgt Mass | Diff (ppm) | Ion Species        | Score |
|-----------------|-------|----------|----------|------------|--------------------|-------|
| C19 H19 F N6 O4 | FALSE | 414.1487 | 414.1452 | -8.45      | C19 H19 F N6 Na O4 | 71.24 |

--- End Of Report ---

# Compound 14b-3

## Qualitative Analysis Report

Data Filename: 14B3.d Sample Name: 14B3  
Sample Type: Sample Position: P1-F8  
Instrument Name: Instrument 1 User Name:  
Acq Method: ZHENG100-1000.m Acquired Time: 12/18/2021 10:03:04 AM  
IRM Calibration Status: Success DA Method: 20170311.m  
Comment:

Sample Group: Info.  
Acquisition SW: 6200 series TOF/6500 series  
Version: Q-TOF B.05.01 (B5125.2)

### User Spectra

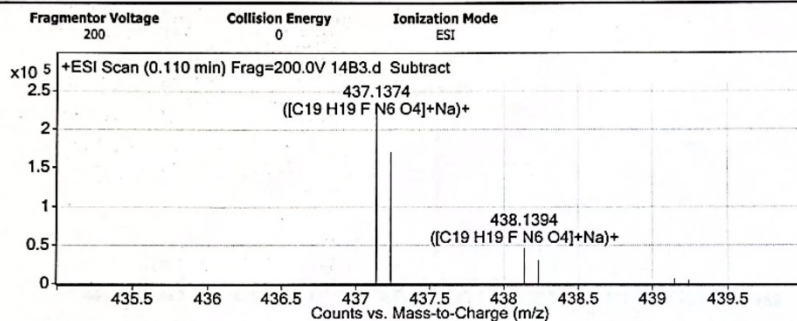

### Peak List

| m/z      | z | Abund      |
|----------|---|------------|
| 274.2756 | 1 | 733396.81  |
| 318.302  | 1 | 537000.38  |
| 475.3283 | 2 | 842461.13  |
| 588.4124 | 1 | 1506011.88 |
| 589.416  | 1 | 527113.63  |
| 701.4973 | 1 | 2950452.75 |
| 702.5003 | 1 | 1297365.5  |
| 814.5826 | 1 | 1642104.75 |
| 815.5861 | 1 | 829665.94  |
| 927.6681 | 1 | 352693.91  |

### Formula Calculator Element Limits

| Element | Min | Max |
|---------|-----|-----|
| C       | 3   | 60  |
| H       | 0   | 120 |
| O       | 0   | 30  |
| N       | 0   | 30  |
| F       | 1   | 1   |
| S       | 0   | 0   |

### Formula Calculator Results

| Formula                                                         | Best  | Mass    | Tgt Mass | Diff (ppm) | Ion Species                                                        | Score |
|-----------------------------------------------------------------|-------|---------|----------|------------|--------------------------------------------------------------------|-------|
| C <sub>19</sub> H <sub>19</sub> F N <sub>6</sub> O <sub>4</sub> | FALSE | 414.148 | 414.1452 | -6.89      | C <sub>19</sub> H <sub>19</sub> F N <sub>6</sub> Na O <sub>4</sub> | 81.81 |

--- End Of Report ---

# Compound 14b-5

## Qualitative Analysis Report

|                        |                             |               |                       |
|------------------------|-----------------------------|---------------|-----------------------|
| Data Filename          | 14B6.d                      | Sample Name   | 14B6                  |
| Sample Type            | Sample                      | Position      | P1-A2                 |
| Instrument Name        | Instrument 1                | User Name     |                       |
| Acq Method             | ZHENG100-1000.m             | Acquired Time | 12/17/2021 7:30:24 PM |
| IRM Calibration Status | Success                     | DA Method     | 20170311.m            |
| Comment                |                             |               |                       |
| Sample Group           | Info.                       |               |                       |
| Acquisition SW         | 6200 series TOF/6500 series |               |                       |
| Version                | Q-TOF B.05.01 (B5125.2)     |               |                       |

### User Spectra

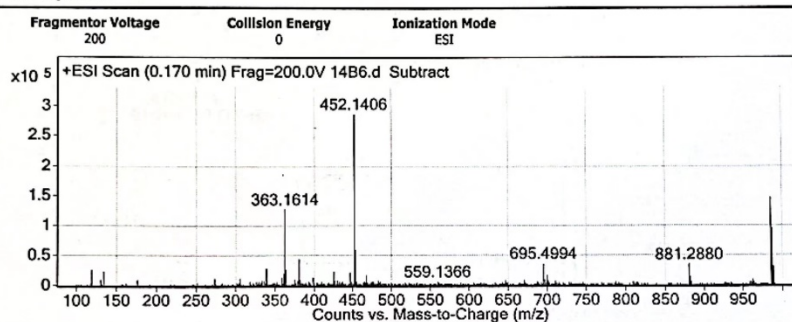

### Peak List

| m/z      | z | Abund     |
|----------|---|-----------|
| 339.2349 | 1 | 28188.79  |
| 363.1614 | 1 | 126276.76 |
| 381.1713 | 1 | 42973.77  |
| 452.1406 | 1 | 287194.75 |
| 453.1437 | 1 | 58531.06  |
| 695.4994 | 1 | 34942.29  |
| 881.288  | 1 | 33666.73  |
| 985.7261 | 1 | 145446.08 |
| 986.7291 | 1 | 94219.14  |
| 987.7296 | 1 | 30126.18  |

### Formula Calculator Element Limits

| Element | Min | Max |
|---------|-----|-----|
| C       | 3   | 60  |
| H       | 0   | 120 |
| O       | 0   | 30  |
| N       | 0   | 30  |
| F       | 2   | 2   |
| S       | 0   | 0   |

--- End Of Report ---



# Compound 14b-6

## Qualitative Analysis Report

|                        |                 |               |                       |
|------------------------|-----------------|---------------|-----------------------|
| Data Filename          | 14B5.d          | Sample Name   | 14B5                  |
| Sample Type            | Sample          | Position      | P1-A1                 |
| Instrument Name        | Instrument 1    | User Name     |                       |
| Acq Method             | ZHENG100-1000.m | Acquired Time | 12/17/2021 7:27:27 PM |
| IRM Calibration Status | Success         | DA Method     | 20170311.m            |
| Comment                |                 |               |                       |

  

|                |                             |       |
|----------------|-----------------------------|-------|
| Sample Group   |                             | Info. |
| Acquisition SW | 6200 series TOF/6500 series |       |
| Version        | Q-TOF B.05.01 (B5125.2)     |       |

### User Spectra

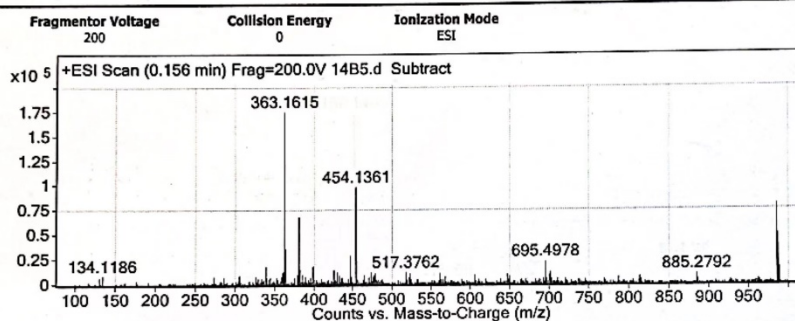

### Peak List

| m/z      | z | Abund     |
|----------|---|-----------|
| 363.1615 | 1 | 175003.34 |
| 364.1637 | 1 | 35270.89  |
| 381.1712 | 1 | 68031.12  |
| 399.1844 | 1 | 18222.71  |
| 447.2053 | 1 | 28160.41  |
| 454.1361 | 1 | 97984.98  |
| 455.1431 | 1 | 23152.24  |
| 695.4978 | 1 | 22431.54  |
| 985.7253 | 1 | 79402.95  |
| 986.7271 | 1 | 50751.21  |

### Formula Calculator Element Limits

| Element | Min | Max |
|---------|-----|-----|
| C       | 3   | 60  |
| H       | 0   | 120 |
| O       | 0   | 30  |
| N       | 0   | 30  |
| F       | 1   | 1   |
| S       | 0   | 0   |

--- End Of Report ---
